# Supplementary material
Source: PubMed Central journal article supplement (PMC7883471)
Supplement: ml0c00649_si_001.pdf [file ml0c00649_si_001.pdf]

## Supporting Information

# Novel Linker Variants of Antileishmanial / Antitubercular 7-Substituted 2-Nitroimidazooxazines Offer Enhanced Solubility

Andrew M. Thompson,<sup>\*,†</sup> Patrick D. O'Connor,<sup>†,^</sup> Vanessa Yardley,<sup>‡</sup> Louis Maes,<sup>||</sup> Delphine Launay,<sup>#</sup> Stephanie Braillard,<sup>#</sup> Eric Chatelain,<sup>#</sup> Baojie Wan,<sup>§</sup> Scott G. Franzblau,<sup>§</sup> Zhenkun Ma,<sup>‡,@</sup> Christopher B. Cooper,<sup>‡</sup> and William A. Denny<sup>†</sup>

<sup>†</sup>*Auckland Cancer Society Research Centre, School of Medical Sciences, The University of Auckland, Private Bag 92019, Auckland 1142, New Zealand*

<sup>‡</sup>*Faculty of Infectious & Tropical Diseases, London School of Hygiene & Tropical Medicine, Keppel Street, London WC1E 7HT, United Kingdom*

<sup>||</sup>*Laboratory for Microbiology, Parasitology and Hygiene, Faculty of Pharmaceutical, Biomedical and Veterinary Sciences, University of Antwerp, Universiteitsplein 1, B-2610 Antwerp, Belgium*

<sup>#</sup>*Drugs for Neglected Diseases initiative, 15 Chemin Louis Dunant, 1202 Geneva, Switzerland*

<sup>§</sup>*Institute for Tuberculosis Research, College of Pharmacy, University of Illinois at Chicago, 833 South Wood Street, Chicago, Illinois 60612, United States*

<sup>‡</sup>*Global Alliance for TB Drug Development, 40 Wall St, New York 10005, United States*

Current addresses

<sup>^</sup>*Helmholtz Zentrum München, Ingolstädter Landstr. 1, 85764 Neuherberg, Germany*

<sup>@</sup>*TenNor Therapeutics Ltd, 218 Xinghu Street, Suzhou Industrial Park, Suzhou 215123, China*

\*Corresponding author

Email: am.thompson@auckland.ac.nz

## Contents

Table S1. Complete (mean  $\pm$  standard deviation) *in vitro* antiparasitic and antitubercular data for the compounds of Table 1 (p S3)

Table S2. Complete (mean  $\pm$  standard deviation) comparative *in vitro* antiparasitic and antitubercular data for some recently reported analogues of **8** (p S4)

Additional SAR discussion (p S4)

Table S3. Complete (mean  $\pm$  standard deviation) *in vivo* efficacy data for selected analogues in the *L. don* mouse model (p S5)

Figure S1. Comparative *in vivo* efficacy of selected analogues against *L. don* in the VL mouse model at 50 mg/kg and 25 mg/kg (p S5)

Figure S2. Plasma concentration-time profiles for **65** and **66** in BALB/c mice, following intravenous dosing at 1 mg/kg or oral dosing at 25 mg/kg (p S6)

Figure S3. Plasma concentration-time profiles for **8** and **10** in Swiss Albino mice, following intravenous dosing at 1 mg/kg or oral dosing at 25 mg/kg (p S7)

Figure S4. Effect of lipophilicity on potency against *L. inf* or *Mycobacterium tuberculosis* (*M. tb*) for the compounds of Table 1 (p S8)

Schemes S1-S3. More detailed depictions of synthetic routes to the new linker analogues of Table 1 (pp S9-S11)

Experimental procedures and characterizations for the new compounds of Table 1, and assay protocols (pp S12-S27)

References for Supporting Information (pp S28-S29)

Table S4. Combustion analyses for the new compounds of Table 1 and intermediates (p S30)

Copies of  $^1\text{H}$  and  $^{13}\text{C}$  NMR spectra for representative examples, including key compounds (pp S31-S65)

**Table S1.** Complete *in vitro* antiparasitic and antitubercular data for the compounds of Table 1 (all data for **8**, **10**, **59** and **60** from ref S1; all data for **11** and **12** from ref S2).

| Compd     | IC <sub>50</sub> (μM) <sup>a,b</sup> |                            |                        |                      | Select. Index <sup>c</sup> | MIC <sub>90</sub> (μM) <sup>b,d</sup> |                        |
|-----------|--------------------------------------|----------------------------|------------------------|----------------------|----------------------------|---------------------------------------|------------------------|
|           | <i>L. infantum</i>                   | <i>T. cruzi</i>            | <i>T. brucei</i>       | MRC-5                |                            | MABA                                  | LORA                   |
| <b>10</b> | 0.047 ± 0.021 <sup>e</sup>           | 0.061 ± 0.028 <sup>f</sup> | >64                    | >64                  | >1362                      | 5.2 ± 2.6 <sup>g</sup>                | 4.7 ± 2.6 <sup>h</sup> |
| <b>8</b>  | 0.13 ± 0.05 <sup>e</sup>             | 0.14 ± 0                   | >64                    | >64                  | >492                       | 0.94 ± 0.04                           | 6.8 ± 3.1 <sup>f</sup> |
| <b>11</b> | 0.13 ± 0.07 <sup>f</sup>             | 0.18 ± 0.05                | >64                    | >64                  | >492                       | 0.86 ± 0.10                           | 7.0 ± 5.1              |
| <b>12</b> | 0.45 ± 0.05 <sup>f</sup>             | 0.45 ± 0.15                | >64                    | >64                  | >142                       | 1.3 ± 0.4                             | 5.0 ± 3.2              |
| <b>15</b> | 0.15 ± 0.02 <sup>f</sup>             | 0.45 ± 0.03                | >64                    | >64                  | >427                       | 1.7 ± 0.3                             | 10 ± 6                 |
| <b>18</b> | 0.18 ± 0.07 <sup>i</sup>             | 0.50 ± 0.29                | >64                    | >64                  | >356                       | 0.17 ± 0.07                           | 8.1 ± 5.0              |
| <b>20</b> | 0.29 ± 0.07 <sup>f</sup>             | 0.45 ± 0.24                | >64                    | >64                  | >221                       | 0.65 ± 0.21                           | 10 ± 6                 |
| <b>22</b> | 0.93 ± 0.54                          | 1.2 ± 0.3                  | >64                    | >64                  | >69                        | 7.2 ± 3.2                             | 36 ± 5                 |
| <b>24</b> | 0.22 ± 0.02 <sup>f</sup>             | 1.1 ± 0.5 <sup>f</sup>     | >64                    | >64                  | >291                       | 0.11 ± 0.01                           | 6.5 ± 3.9 <sup>f</sup> |
| <b>26</b> | 0.27 ± 0.02 <sup>f</sup>             | 0.65 ± 0.32 <sup>f</sup>   | 23 ± 0                 | 52 ± 18 <sup>f</sup> | 193                        | 0.091 ± 0.034                         | 6.9 ± 3.8              |
| <b>28</b> | 0.31 ± 0.02 <sup>f</sup>             | 0.51 ± 0.08                | >64                    | >64                  | >206                       | 0.23 ± 0.02                           | 3.9 ± 2.6 <sup>f</sup> |
| <b>30</b> | 0.48 ± 0.19                          | 0.59 ± 0.34                | >64                    | >64                  | >133                       | 1.3 ± 0.4                             | 8.2 ± 6.2              |
| <b>35</b> | 2.2 ± 0.5                            | 4.2 ± 0.4                  | >64                    | >64                  | >29                        | 12 ± 0                                | 31 ± 10                |
| <b>40</b> | 0.13 ± 0                             | 0.55 ± 0.02                | >64                    | >64                  | >492                       | 0.24 ± 0.01                           | 7.1 ± 0.8              |
| <b>43</b> | 1.5 ± 0.8 <sup>f</sup>               | 3.8 ± 1.2                  | 56 ± 5 <sup>f</sup>    | >64                  | >43                        | (2.2)                                 | (31)                   |
| <b>44</b> | 1.4 ± 0.1                            | 6.1 ± 0.6                  | 59 ± 5                 | >64                  | >46                        | (2.5)                                 | (32)                   |
| <b>45</b> | 1.3 ± 0.2                            | 4.4 ± 0.9                  | >64                    | >64                  | >49                        | 0.82 ± 0.16                           | 22 ± 9                 |
| <b>46</b> | 9.9 ± 3.6                            | 2.7 ± 0.8                  | >64                    | >64                  | >6.5                       | (31)                                  | (54)                   |
| <b>47</b> | 2.0 ± 0.1                            | 6.5 ± 2.5                  | >64                    | >64                  | >32                        | 1.8 ± 0.1                             | 12 ± 1                 |
| <b>48</b> | 1.7 ± 0.5                            | 20 ± 11                    | >64                    | >64                  | >38                        | 3.9 ± 0.3                             | 14 ± 2                 |
| <b>49</b> | 3.3 ± 1.2                            | 3.6 ± 0.9                  | 1.4 ± 0.7 <sup>f</sup> | >64                  | >19                        | 0.61 ± 0.20 <sup>f</sup>              | 3.8 ± 0                |
| <b>51</b> | 1.4 ± 0                              | 2.8 ± 0.1                  | 9.2 ± 1.6              | 40 ± 12              | 29                         | 0.82 ± 0.13                           | 8.6 ± 1.9              |
| <b>53</b> | 1.8 ± 0.3                            | 4.0 ± 0.3                  | 36 ± 6                 | >64                  | >36                        | 0.90 ± 0                              | 19 ± 5                 |
| <b>55</b> | 0.16 ± 0.02                          | 1.8 ± 0.4                  | >64                    | >64                  | >400                       | 0.90 ± 0.07                           | 5.3 ± 0.1              |
| <b>57</b> | 2.2 ± 1.0                            | 3.8 ± 1.4                  | >64                    | >64                  | >29                        | 0.88 ± 0.06                           | 14 ± 2                 |
| <b>58</b> | 2.0 ± 0.1                            | 2.0 ± 0.4                  | >64                    | >64                  | >32                        | 5.5 ± 1.1                             | 24 ± 2                 |
| <b>59</b> | 0.12 ± 0.05 <sup>g</sup>             | 1.2 ± 0.7 <sup>f</sup>     | >64                    | >64                  | >533                       | 1.0 ± 0.5 <sup>f</sup>                | 7.5 ± 3.4 <sup>f</sup> |
| <b>60</b> | 0.30 ± 0.07 <sup>f</sup>             | 0.75 ± 0.41 <sup>f</sup>   | >64                    | >64                  | >213                       | 0.55 ± 0.23 <sup>f</sup>              | 3.3 ± 1.7 <sup>f</sup> |
| <b>64</b> | 0.49 ± 0.04                          | 2.2 ± 0.5                  | 46 ± 18                | >64                  | >131                       | 0.55 ± 0.30                           | 3.7 ± 0.1              |
| <b>65</b> | 0.36 ± 0.22                          | 0.88 ± 0.53                | 5.5 ± 1.6 <sup>f</sup> | >64                  | >178                       | 0.58 ± 0.21                           | 12 ± 3                 |
| <b>66</b> | 0.36 ± 0.04                          | 1.6 ± 0.3                  | 33 ± 1 <sup>f</sup>    | >64                  | >178                       | 0.34 ± 0.02                           | 7.3 ± 0.4              |
| <b>68</b> | 0.14 ± 0.01                          | 2.3 ± 0.8                  | 19 ± 11                | >64                  | >457                       | 0.085 ± 0.036                         | 1.0 ± 0.1              |
| <b>69</b> | 0.20 ± 0                             | 4.3 ± 2.1                  | 48 ± 16                | >64                  | >320                       | 0.39 ± 0.21                           | 2.9 ± 0.6              |
| <b>70</b> | 0.64 ± 0.10                          | 1.7 ± 0.1                  | >64                    | >64                  | >100                       | (3.6)                                 | (37)                   |
| <b>71</b> | 0.18 ± 0.03                          | 2.8 ± 0.3                  | 32 ± 8                 | >64                  | >356                       | 0.94 ± 0.01                           | 7.3 ± 0.1              |
| <b>72</b> | 0.32 ± 0                             | 1.7 ± 0.1                  | >64                    | 44 ± 20              | 138                        | 1.8 ± 0                               | 6.3 ± 0.3              |
| <b>73</b> | 0.79 ± 0                             | 1.6 ± 0.1                  | 8.0 ± 0.3              | 43 ± 21              | 54                         | 2.8 ± 0.8                             | 3.4 ± 0.1              |
| <b>74</b> | 1.3 ± 0.8                            | 2.1 ± 0.1                  | 8.2 ± 0.1              | >64                  | >49                        | 1.7 ± 0.2                             | 46 ± 18                |

<sup>a</sup>IC<sub>50</sub> values for inhibiting the growth of *Leishmania infantum* (in mouse macrophages), *Trypanosoma cruzi* (on MRC-5 cells), and *Trypanosoma brucei*, or for cytotoxicity toward human lung fibroblasts (MRC-5 cells). <sup>b</sup>Each value (except the single test MIC data in parentheses) is the mean of N=2 measurements (± SD), unless noted. <sup>c</sup>Selectivity index: ratio of MRC-5 to *L. inf* IC<sub>50</sub> values. <sup>d</sup>MIC<sub>90</sub> against *M. tb* under aerobic (MABA) or hypoxic (LORA) conditions. <sup>e</sup>N=7. <sup>f</sup>N=3. <sup>g</sup>N=4. <sup>h</sup>N=5. <sup>i</sup>N=6.

**Table S2.** Complete comparative *in vitro* antiparasitic and antitubercular data for some recently reported analogues of **8** (all data for **75** and **76** from ref S2).<sup>S2,S3</sup>

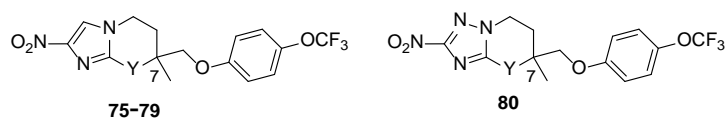

| Compd     | Y               | IC <sub>50</sub> (μM) <sup>a,b</sup> |                          |                  |       | MIC <sub>90</sub> (μM) <sup>b,c</sup> |                        |
|-----------|-----------------|--------------------------------------|--------------------------|------------------|-------|---------------------------------------|------------------------|
|           |                 | <i>L. infantum</i>                   | <i>T. cruzi</i>          | <i>T. brucei</i> | MRC-5 | MABA                                  | LORA                   |
| <b>8</b>  | O               | 0.13 ± 0.05 <sup>d</sup>             | 0.14 ± 0                 | >64              | >64   | 0.94 ± 0.04                           | 6.8 ± 3.1 <sup>e</sup> |
| <b>75</b> | O <sup>f</sup>  | 0.098 ± 0.049 <sup>g</sup>           | 0.052 ± 0.001            | >64              | >64   | 0.59 ± 0.36                           | 1.4 ± 0.2              |
| <b>76</b> | O <sup>h</sup>  | 0.17 ± 0.09 <sup>i</sup>             | 0.34 ± 0.03              | >64              | >64   | 3.6 ± 0.8                             | 18 ± 12                |
| <b>77</b> | S               | 62 ± 3 <sup>j</sup>                  | 0.46 ± 0.13 <sup>j</sup> | >64              | >64   | 0.54 ± 0.35 <sup>e</sup>              | 4.3 ± 0.2              |
| <b>78</b> | SO              | 41 ± 23 <sup>j</sup>                 | 2.4 ± 1.0 <sup>j</sup>   | 18 ± 6           | >64   | (16)                                  | (61)                   |
| <b>79</b> | SO <sub>2</sub> | >64                                  | 0.69 ± 0.01              | >64              | >64   | (12)                                  | >128                   |
| <b>80</b> | O               | >64                                  | 0.54 ± 0                 | 33 ± 1           | >64   | (29)                                  | >128                   |

<sup>a</sup>IC<sub>50</sub> values for inhibiting the growth of *Leishmania infantum* (in mouse macrophages), *Trypanosoma cruzi* (on MRC-5 cells), and *Trypanosoma brucei*, or for cytotoxicity toward human lung fibroblasts (MRC-5 cells). <sup>b</sup>Each value (except the single test MIC data in parentheses) is the mean of N=2 measurements (± SD), unless otherwise noted. <sup>c</sup>MIC<sub>90</sub> against *M. tb* under aerobic (MABA) or hypoxic (LORA) conditions. <sup>d</sup>N=7. <sup>e</sup>N=3. <sup>f</sup>(7*R*)-Enantiomer. <sup>g</sup>N=8. <sup>h</sup>(7*S*)-Enantiomer. <sup>i</sup>N=6. <sup>j</sup>N=4.

### Additional discussion

Following on from our observation (in the manuscript) that “across all 7-Me linker derivatives, the association between VL potency and effectiveness against TB was only moderate”, we note that further SAR variances were encountered for a few heterocyclic analogues of **8** that we had recently studied<sup>S3</sup> for Chagas disease (**77-80**; Table S2). In particular, replacement of the oxygen atom in the oxadiazole ring of **8** by sulfur (**77**) led to a 477-fold reduction in potency against *L. inf*, compared to a 1.6- to 1.7-fold *increased* effectiveness against *Mycobacterium tuberculosis* (*M. tb*), although this latter activity was greatly reduced (14- to >30-fold) upon S-oxidation (**78** and **79**). However, switching the nitroimidazole ring to a nitrotriazole ring (**80**) was poorly tolerated for both VL and TB, as noted previously for other structurally related scaffolds.<sup>S4,S5</sup>

**Table S3.** Complete *in vivo* efficacy data for selected analogues in the *L. don* mouse model.

| Compd     | <i>In Vivo</i> Efficacy Against <i>L. don</i> (% Parasite Load Reduction at Dose in mg/kg) <sup>a</sup> |             |             |             |             | ED <sub>50</sub> (95% C.I.) <sup>b</sup> |
|-----------|---------------------------------------------------------------------------------------------------------|-------------|-------------|-------------|-------------|------------------------------------------|
|           | 50                                                                                                      | 25          | 12.5        | 6.25        | 3.13        |                                          |
| <b>8</b>  |                                                                                                         | 100 ± 0     | 100 ± 0     | 82.7 ± 8.0  | 25.1 ± 20.6 | 4.2 (3.7-4.6)                            |
| <b>10</b> |                                                                                                         | 86.9 ± 5.9  |             |             |             |                                          |
| <b>18</b> | 99.7 ± 0.2                                                                                              |             |             | 29.5 ± 37.1 |             |                                          |
| <b>26</b> | 58.3 ± 6.9                                                                                              |             |             |             |             |                                          |
| <b>44</b> | 70.6 ± 18.9                                                                                             |             |             |             |             |                                          |
| <b>51</b> | 36.0 ± 15.5                                                                                             |             |             |             |             |                                          |
| <b>66</b> | 99.95 ± 0.06                                                                                            | 97.0 ± 3.4  | 7.1 ± 15.1  |             |             | 16.3 (14.5-18.4)                         |
| <b>68</b> |                                                                                                         | 88.6 ± 7.5  | 40.4 ± 22.3 |             |             |                                          |
| <b>69</b> |                                                                                                         | 51.0 ± 11.1 | 31.0 ± 8.4  |             |             |                                          |

<sup>a</sup>Dosing was orally, once daily for 5 days consecutively; data are the mean percentage reduction of parasite burden in the liver (± standard deviation). <sup>b</sup>Dose in mg/kg required to achieve a mean 50% reduction in parasite burden (with 95% confidence interval).

**Figure S1.** Comparative *in vivo* efficacy of selected analogues against *L. don* in the VL mouse model (liver burden only): (a) 50 mg/kg and (b) 25 mg/kg.

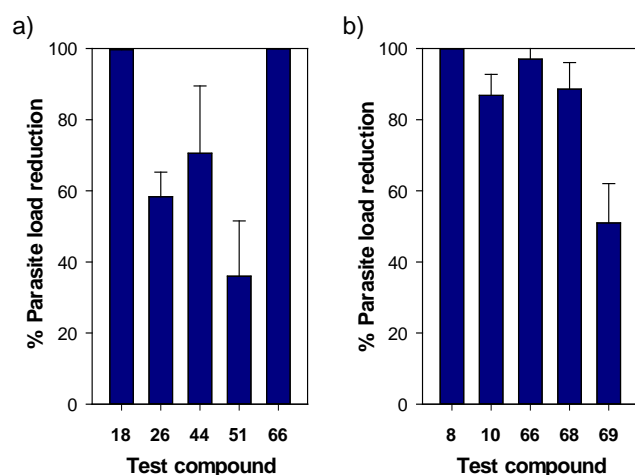

**Figure S2.** Plasma concentration-time profiles for **65** and **66** in BALB/c mice, following a single intravenous dose of 1 mg/kg or a single oral dose of 25 mg/kg in each case.

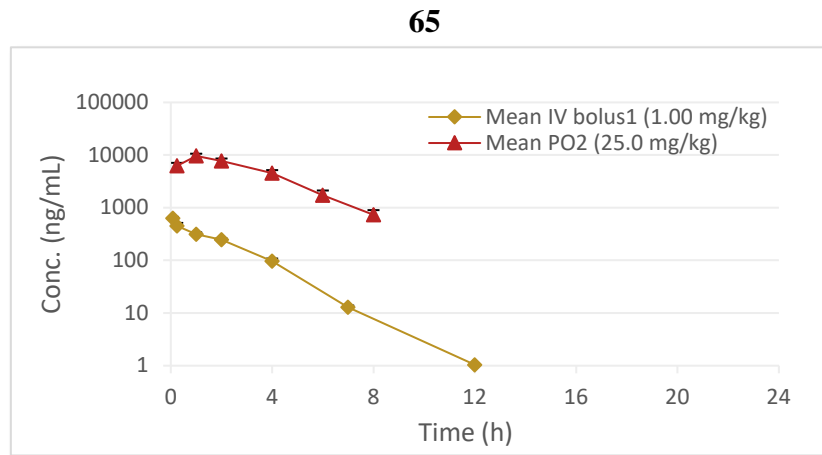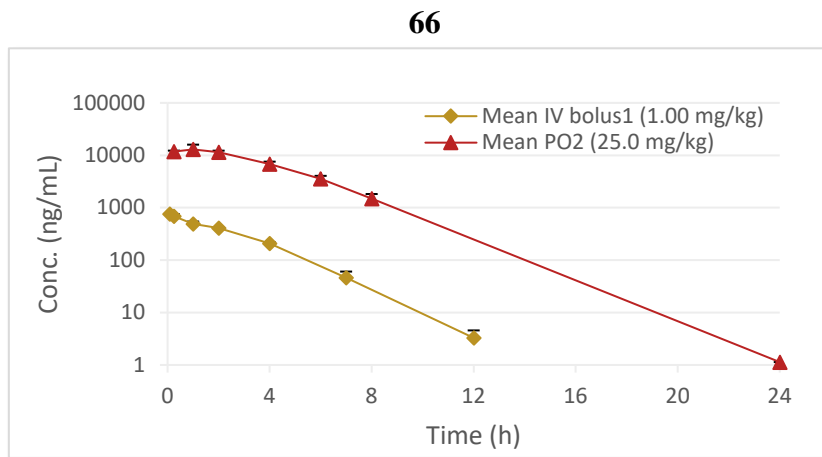

**Figure S3.** Plasma concentration-time profiles for **8** and **10** in Swiss Albino mice, following a single intravenous dose of 1 mg/kg or a single oral dose of 25 mg/kg in each case.

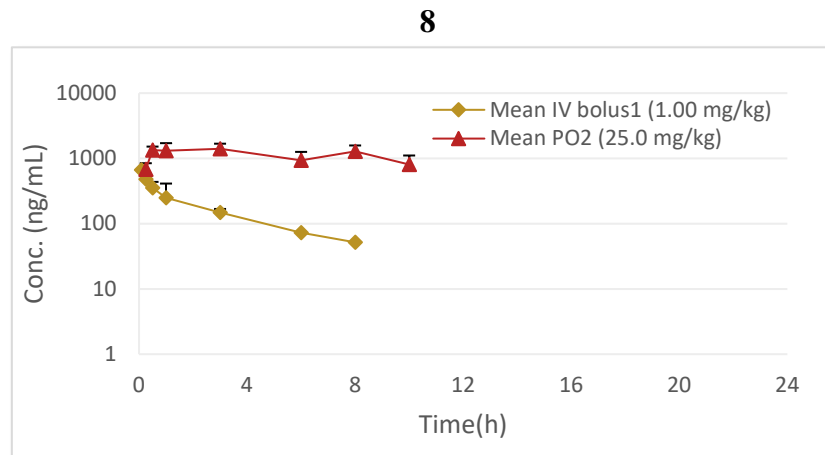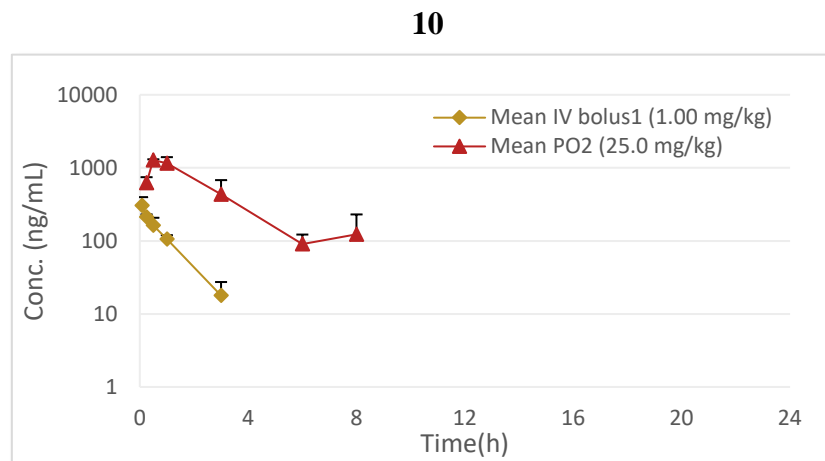

**Figure S4.** Effect of lipophilicity on potency against *L. inf* or *M. tb* for the compounds of Table 1.

a) CLogP vs potency against *L. inf* (complete dataset)

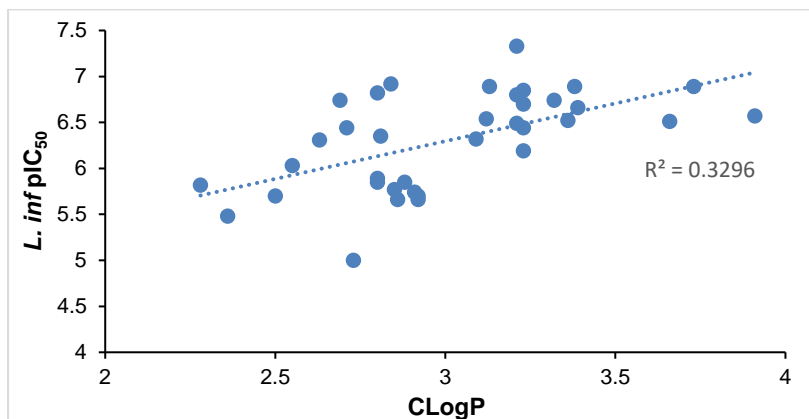

b) CLogP vs potency against *M. tb* (MABA assay; 7-Me subset only)

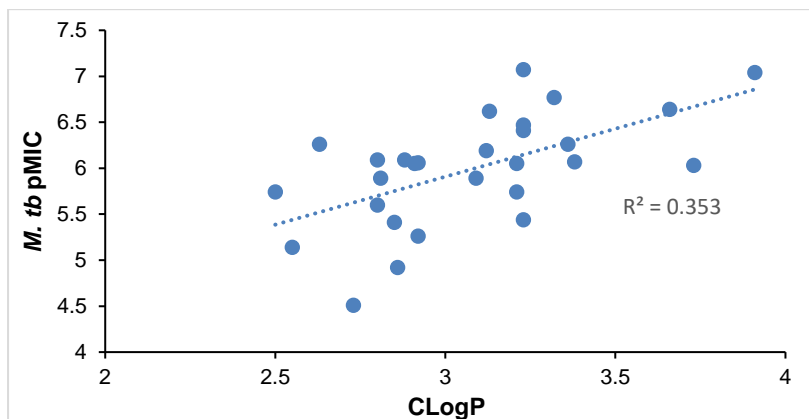



### Scheme S1<sup>a</sup>

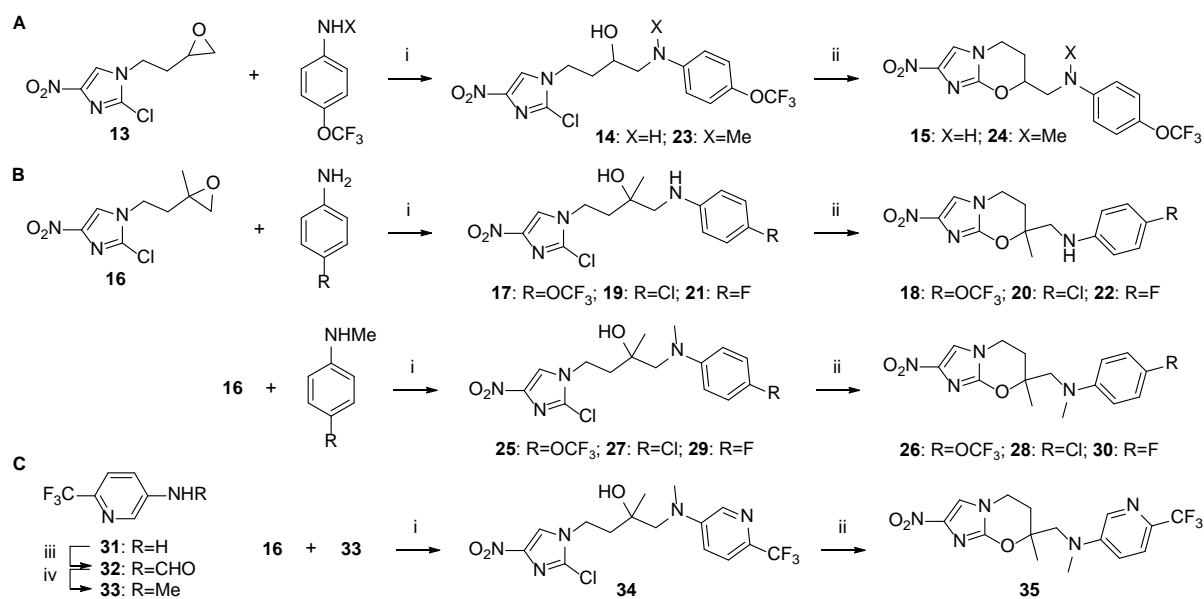

<sup>a</sup>Reagents and conditions: (i) CoCl<sub>2</sub>, CH<sub>3</sub>CN, 65-75 °C, 1-3 d (17-97%); (ii) NaH, DMF, 0-20 °C, 2-4.3 h (or 50-70 °C, 2-3 h) (9-63%); (iii) HCOOH/Ac<sub>2</sub>O, THF, 20 °C, 23 h (97%); (iv) Me<sub>2</sub>S·BH<sub>3</sub>, THF, 0-20 °C, 0.5 h, then 65 °C, 3.5 h (72%).

## Scheme S2<sup>a</sup>

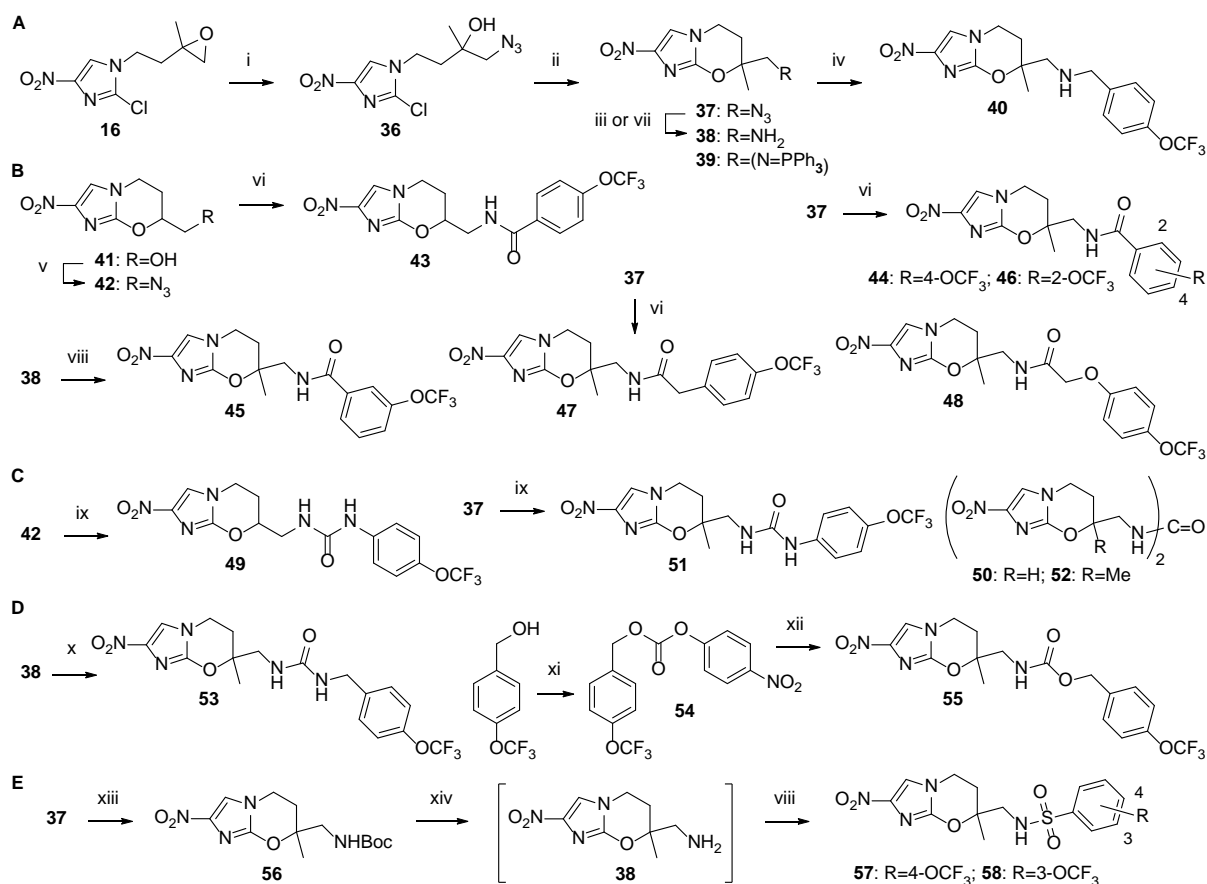

<sup>a</sup>Reagents and conditions: (i) NaN<sub>3</sub>, CTAB, MeOH, 20 °C, 45 min, then 40 °C, 17 h (73%); (ii) NaH, DMF, 0-20 °C, 2.5 h (70%); (iii) PPh<sub>3</sub>, aq dioxane, 12-20 °C, 1 d (**38**: 48%, **39**: 32%); (iv) 4-OCF<sub>3</sub>PhCHO, NaBH<sub>3</sub>CN, AcOH, DMF, 0-20 °C, 21 h (50%); (v) PPh<sub>3</sub>, DEAD, DPPA, DMF, 0-20 °C, 45 h (83%); (vi) PPh<sub>3</sub>, ArCOCl (or 4-OCF<sub>3</sub>PhOCH<sub>2</sub>COCl), CH<sub>2</sub>Cl<sub>2</sub>, 20 °C, 1.5-2.2 h (51-84%); (vii) HS(CH<sub>2</sub>)<sub>3</sub>SH, Et<sub>3</sub>N, MeOH, CH<sub>2</sub>Cl<sub>2</sub>, 15-20 °C, 12 h (83%); (viii) 3-OCF<sub>3</sub>PhCOCl or RPhSO<sub>2</sub>Cl, DIPEA, DMF, 0-20 °C, 3-19 h (46-81%); (ix) PPh<sub>3</sub>, 4-OCF<sub>3</sub>PhNH<sub>2</sub>, 2 M TEAB, dioxane, 12-20 °C, 35 h (14-17%); (x) 4-OCF<sub>3</sub>BnNCO, DIPEA, Bu<sub>2</sub>Sn(OAc)<sub>2</sub>, DMF, 20 °C, 16 h (93%); (xi) 4-NO<sub>2</sub>PhOCOCl, pyridine, CH<sub>2</sub>Cl<sub>2</sub>, 0-20 °C, 20 h (98%); (xii) **38**, DMAP, DIPEA, DMF, 20 °C, 44 h (71%); (xiii) PPh<sub>3</sub>, Boc-ON, CH<sub>2</sub>Cl<sub>2</sub>, 0-20 °C, 1 d (67%); (xiv) TFA, CH<sub>2</sub>Cl<sub>2</sub>, 20 °C, 7 h (100%).

### Scheme S3<sup>a</sup>

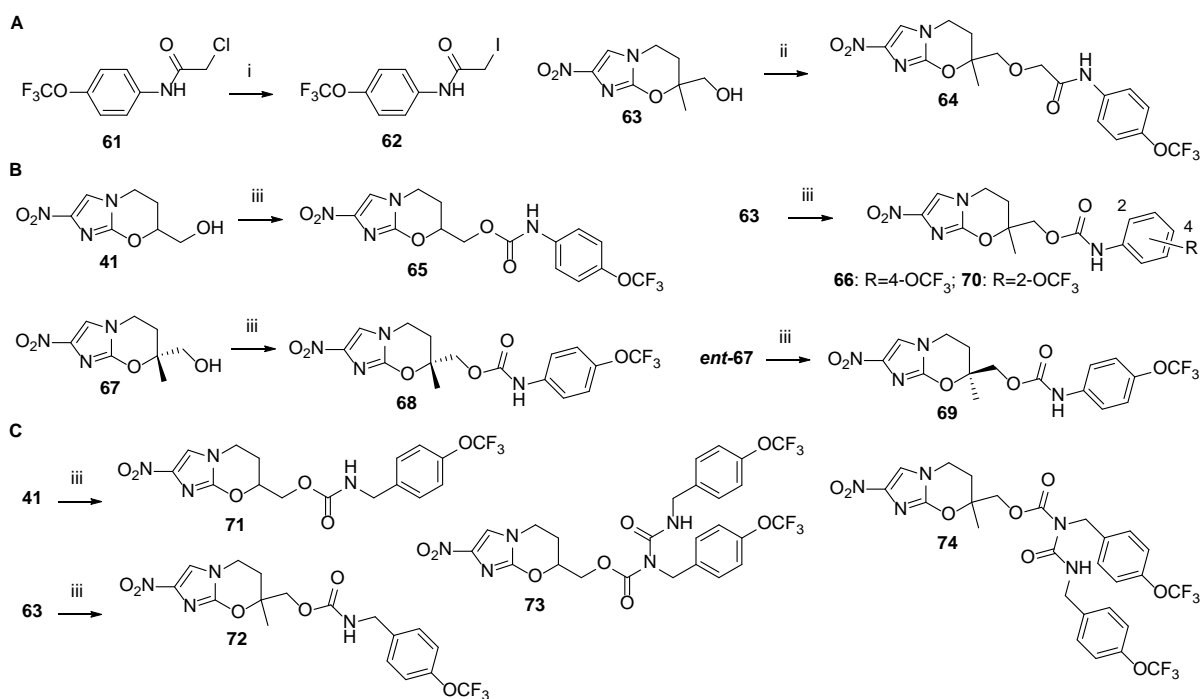

<sup>a</sup>Reagents and conditions: (i) NaI, acetone, 56 °C, 2 h, then 20 °C, 15 h (96%); (ii) **62**, NaH, DMF, 0-20 °C, 80 min (4%); (iii) ArNCO, CuCl, DMF, 20 °C, 32-52 h (44-98%).

## Experimental Section

Combustion analyses were executed by the Campbell Microanalytical Laboratory, University of Otago, Dunedin, New Zealand. Melting points were measured using an Electrothermal IA9100 melting point apparatus and are as read. NMR spectra were recorded on a Bruker Avance 400 spectrometer at 400 MHz for  $^1\text{H}$  and 100 MHz for  $^{13}\text{C}$  and were referenced to  $\text{Me}_4\text{Si}$  or solvent resonances. Chemical shifts and coupling constants were listed in units of ppm and hertz, respectively. High-resolution electrospray ionisation mass spectrometry (HRESIMS) was performed on a Bruker micrOTOF-Q II mass spectrometer or an Agilent 6530 Q-TOF mass spectrometer coupled to an Agilent 1200 series HPLC system. Low-resolution atmospheric pressure chemical ionisation (APCI) mass spectra were determined for organic solutions using either a ThermoFinnigan Surveyor MSQ mass spectrometer coupled to a Gilson autosampler or an Agilent 6120 Quadrupole LC/MS connected to an Agilent 1260 Infinity autosampler and quaternary pump. Optical rotations were measured on a Schmidt + Haensch Polartronic NH8 polarimeter. Column chromatography was carried out on silica gel (Merck 230-400 mesh) and thin-layer chromatography was completed on aluminum-backed silica gel plates (Merck 60 F<sub>254</sub>), with visualization of components by UV light (254 nm),  $\text{I}_2$ , or  $\text{KMnO}_4$  staining. Tested compounds (including batches screened *in vivo*) were  $\geq 95\%$  pure, as verified by combustion analysis and/or by HPLC performed on an Agilent 1100 system with diode array detection, using a 150 mm x 3.2 mm Altima 5  $\mu\text{m}$  reversed phase C8 or C18 column. Combustion analyses indicated by the symbols of the elements were within  $\pm 0.4\%$  of the theoretical values.

### General Procedure A: Synthesis of arylamino alcohols from epoxides (intermediates 14, 17, 19, 21, 23, 25, 27, 29 and 34)

A mixture of the epoxide (**13** or **16**, 600 mg, 1.0 equiv), aryl amine (1.2-2.4 equiv) and anhydrous cobalt(II) chloride (0.2-0.9 equiv) in anhydrous acetonitrile (10 mL) was stirred at 70 °C for 48 h. The resulting cooled mixture was added to ice-water (100 mL) and extracted with  $\text{CH}_2\text{Cl}_2$  (5 x 100 mL). The combined extracts were evaporated to dryness under reduced pressure and the residue was chromatographed on silica gel (0-2%  $\text{MeOH}/\text{CH}_2\text{Cl}_2$ ) to afford the required products.

### General Procedure B: Ring closure of arylamino alcohols (target compounds 15, 18, 20, 22, 24, 26, 28, 30 and 35)

Sodium hydride (60% in mineral oil, 1.5 equiv) was added to a solution of the alcohol (**14**, **17**, **19**, **21**, **23**, **25**, **27**, **29**, or **34**, 1.0 equiv) in anhydrous DMF (1 mL/60 mg of alcohol) under  $\text{N}_2$  at 0 °C. The mixture was quickly degassed and resealed under  $\text{N}_2$  and then stirred at 20 °C for 4.3 h. The resulting mixture was rapidly cooled ( $\text{CO}_2$ /acetone), quenched with ice/aqueous  $\text{NaHCO}_3$  (10 mL), added to brine (100 mL), and extracted with  $\text{CH}_2\text{Cl}_2$  (6 x 100 mL). The combined extracts were evaporated to dryness under reduced pressure (at 30 °C) and the residue was repeatedly chromatographed on silica gel ( $\text{CH}_2\text{Cl}_2$  or 0-2%  $\text{MeOH}/\text{CH}_2\text{Cl}_2$  or 33-67%  $\text{Et}_2\text{O}$ /petroleum ether and  $\text{Et}_2\text{O}$  or 0-50%  $\text{EtOAc}$ /petroleum ether) as necessary to afford the required products.

### General Procedure C: Direct synthesis of amides from azides (target compounds 43, 44, and 46-48)

A solution of triphenylphosphine (1.2 equiv) in anhydrous  $\text{CH}_2\text{Cl}_2$  (2 x 0.5 mL) was added dropwise to a stirred mixture of the azide (**37** or **42**, 120 mg, 1.0 equiv) and the acid chloride (2.0 equiv) in anhydrous  $\text{CH}_2\text{Cl}_2$  (3 mL) under  $\text{N}_2$ . The mixture was stirred at 20 °C for 100

min, then added to ice/aq NaHCO<sub>3</sub> (50 mL), and extracted with CH<sub>2</sub>Cl<sub>2</sub> (4 x 50 mL). The combined extracts were evaporated to dryness under reduced pressure (at 30 °C) and the residue was chromatographed on silica gel (0-75% EtOAc/petroleum ether and EtOAc) to afford the required products.

#### **General Procedure D: Direct synthesis of ureas from azides (target compounds 49 and 51)**

A fresh solution of triethylammonium bicarbonate (~2 M, 3.3 equiv) and triphenylphosphine (1.8 equiv) were successively added to a mixture of the azide (**37** or **42**, 1.0 equiv) and 4-(trifluoromethoxy)aniline (1.3-3.0 equiv) in dioxane (1 mL/14 mg of azide) at 12 °C. The mixture was stirred at 20 °C for 35 h in a sealed vial, then transferred to a flask (in MeOH/CH<sub>2</sub>Cl<sub>2</sub>) and evaporated to dryness under reduced pressure (at 30 °C). The residue was chromatographed on silica gel (0-10% MeOH/CH<sub>2</sub>Cl<sub>2</sub>) to afford the required products.

#### **General Procedure E: Synthesis of sulfonamides from the Boc-protected amine (target compounds 57 and 58)**

Trifluoroacetic acid (1.2 mL) was added to a stirred suspension of Boc derivative **56** (58 mg, 1.0 equiv) in anhydrous CH<sub>2</sub>Cl<sub>2</sub> (1.2 mL). The resulting solution was stirred at 20 °C for 7 h in a sealed vial and then the solvents were removed under a stream of N<sub>2</sub> gas. The oily residue was treated with sodium carbonate (10 equiv) in MeOH (3 mL), stirring at 20 °C for 3 min, then transferred to a flask (in MeOH/CH<sub>2</sub>Cl<sub>2</sub>) and evaporated to dryness under reduced pressure (at 30 °C). The residue was chromatographed on silica gel (0-8% MeOH/CH<sub>2</sub>Cl<sub>2</sub>) to afford amine **38** as a hygroscopic yellow oil. This oil was evaporated twice from toluene, then dissolved in anhydrous DMF (2 mL), sealed under N<sub>2</sub>, and cooled in ice. *N,N*-Diisopropylethylamine (5.3 equiv) and the required arylsulfonyl chloride (3.2 equiv) were successively added (dropwise with stirring), and the mixture was stirred at 20 °C for 3 h, then quenched with ice/aqueous NaHCO<sub>3</sub> (50 mL) and extracted with CH<sub>2</sub>Cl<sub>2</sub> (5 x 50 mL). The combined extracts were evaporated to dryness under reduced pressure (at 30 °C) and the residue was chromatographed on silica gel (0-0.5% MeOH/CH<sub>2</sub>Cl<sub>2</sub>) to afford the required products.

#### **General Procedure F: Synthesis of O-carbamates from alcohols (target compounds 65, 66 and 68-74)**

The aryl isocyanate (1.6 equiv) was added to a solution of the alcohol (**41**, **63**, **67**, or *ent*-**67**, 1.0 equiv) in anhydrous DMF (1 mL/80 mg of alcohol) under N<sub>2</sub>. Copper(I) chloride (0.1-0.2 equiv) was added and the mixture was quickly degassed and resealed under N<sub>2</sub> and then stirred at 20 °C for 33 h. The resulting mixture was diluted with ice-water (5 mL) and then added to brine (50 mL) and extracted with CH<sub>2</sub>Cl<sub>2</sub> (6 x 50 mL). The combined extracts were evaporated to dryness under reduced pressure (at 30 °C) and the residue was chromatographed on silica gel (0-10% EtOAc/CH<sub>2</sub>Cl<sub>2</sub>) to afford the required products.

#### **Syntheses of arylamino derivatives 15-35 (Scheme 1)**

**4-(2-Chloro-4-nitro-1*H*-imidazol-1-yl)-1-[[4-(trifluoromethoxy)phenyl]amino]butan-2-ol (14)**. Reaction of 2-chloro-4-nitro-1-[2-(oxiran-2-yl)ethyl]-1*H*-imidazole<sup>S1</sup> (**13**) (216 mg, 0.992 mmol), 4-(trifluoromethoxy)aniline (316 mg, 1.78 mmol) and anhydrous cobalt(II) chloride (100 mg, 0.770 mmol), using General Procedure A, gave **14** (303 mg, 77%) as a yellow oil; <sup>1</sup>H NMR [(CD<sub>3</sub>)<sub>2</sub>SO] δ 8.55 (s, 1 H), 7.03 (br d, *J* = 8.5 Hz, 2 H), 6.61 (br d, *J* =

9.0 Hz, 2 H), 5.83 (br t,  $J = 5.7$  Hz, 1 H), 5.04 (d,  $J = 5.3$  Hz, 1 H), 4.25-4.10 (m, 2 H), 3.72-3.55 (m, 1 H), 3.04 (ddd,  $J = 13.6, 6.3, 6.0$  Hz, 1 H), 2.99 (ddd,  $J = 13.7, 6.5, 6.0$  Hz, 1 H), 2.09-1.97 (m, 1 H), 1.89-1.73 (m, 1 H); APCI MS calcd for  $C_{14}H_{14}Cl_2F_3N_4O_4$   $m/z$   $[M + Cl]^-$  431, 429, found 431, 429.

***N*-[(2-Nitro-6,7-dihydro-5*H*-imidazo[2,1-*b*][1,3]oxazin-7-yl)methyl]-4-**

**(trifluoromethoxy)aniline (15).** Reaction of alcohol **14** (302 mg, 0.765 mmol) and NaH (48 mg, 1.20 mmol), using General Procedure B at 20 °C for 2 h, gave **15** (26 mg, 9%) as a pale yellow solid: mp 181-183 °C;  $^1H$  NMR  $[(CD_3)_2SO]$   $\delta$  8.06 (s, 1 H), 7.07 (br d,  $J = 8.3$  Hz, 2 H), 6.71 (br d,  $J = 9.0$  Hz, 2 H), 6.23 (br t,  $J = 6.2$  Hz, 1 H), 4.69-4.60 (m, 1 H), 4.15 (ddd,  $J = 12.6, 5.8, 2.6$  Hz, 1 H), 4.05 (ddd,  $J = 12.5, 11.3, 5.0$  Hz, 1 H), 3.49-3.35 (m, 2 H), 2.33-2.23 (m, 1 H), 2.12-1.99 (m, 1 H). Anal. ( $C_{14}H_{13}F_3N_4O_4$ ) C, H, N (see Table S4).

**4-(2-Chloro-4-nitro-1*H*-imidazol-1-yl)-2-methyl-1-[[4-(trifluoromethoxy)phenyl]-**

**amino]butan-2-ol (17).** Reaction of 2-chloro-1-[2-(2-methyloxiran-2-yl)ethyl]-4-nitro-1*H*-imidazole<sup>S1</sup> (**16**) (600 mg, 2.59 mmol), 4-(trifluoromethoxy)aniline (460  $\mu$ L, 3.43 mmol), and anhydrous cobalt(II) chloride (70.7 mg, 0.545 mmol), using General Procedure A at 68 °C, gave **17** (887 mg, 84%) as a yellow oil;  $^1H$  NMR ( $CDCl_3$ )  $\delta$  7.79 (s, 1 H), 7.06 (br d,  $J = 8.9$  Hz, 2 H), 6.66 (br d,  $J = 9.0$  Hz, 2 H), 4.32-4.16 (m, 2 H), 3.98 (br t,  $J = 6.7$  Hz, 1 H), 3.19 (dd,  $J = 13.2, 7.3$  Hz, 1 H), 3.13 (dd,  $J = 13.1, 6.0$  Hz, 1 H), 2.13 (ddd,  $J = 13.8, 9.7, 6.2$  Hz, 1 H), 1.98 (ddd,  $J = 13.5, 10.0, 6.2$  Hz, 1 H), 1.88 (br s, 1 H), 1.37 (s, 3 H); HRESIMS calcd for  $C_{15}H_{16}ClF_3N_4NaO_4$   $m/z$   $[M + Na]^+$  433.0680, 431.0704, found 433.0668, 431.0691.

***N*-[(7-Methyl-2-nitro-6,7-dihydro-5*H*-imidazo[2,1-*b*][1,3]oxazin-7-yl)methyl]-4-**

**(trifluoromethoxy)aniline (18).** Reaction of alcohol **17** (886 mg, 2.17 mmol) and NaH (131 mg, 3.28 mmol), using General Procedure B, gave **18** (143 mg, 18%) as a light yellow solid: mp ( $CH_2Cl_2$ /pentane) 149-150 °C;  $^1H$  NMR  $[(CD_3)_2SO]$   $\delta$  8.06 (s, 1 H), 7.04 (br d,  $J = 8.3$  Hz, 2 H), 6.75 (br d,  $J = 9.1$  Hz, 2 H), 6.11 (br t,  $J = 6.5$  Hz, 1 H), 4.16 (ddd,  $J = 13.0, 5.9, 4.7$  Hz, 1 H), 4.08 (ddd,  $J = 13.1, 9.7, 5.3$  Hz, 1 H), 3.38 (d,  $J = 6.5$  Hz, 2 H), 2.26 (ddd,  $J = 14.4, 9.7, 6.1$  Hz, 1 H), 2.08 (dt,  $J = 14.2, 4.9$  Hz, 1 H), 1.40 (s, 3 H);  $^{13}C$  NMR  $[(CD_3)_2SO]$   $\delta$  148.2, 147.4, 142.2, 138.4 (q,  $J_{C-F} = 1.9$  Hz), 121.9 (2 C), 120.3 (q,  $J_{C-F} = 254.0$  Hz), 117.7, 112.5 (2 C), 82.5, 50.6, 39.5, 27.2, 21.6. Anal. ( $C_{15}H_{15}F_3N_4O_4$ ) C, H, N (see Table S4).

**4-(2-Chloro-4-nitro-1*H*-imidazol-1-yl)-1-[(4-chlorophenyl)amino]-2-methylbutan-2-ol**

**(19).** Reaction of epoxide **16** (152 mg, 0.656 mmol), 4-chloroaniline (110 mg, 0.862 mmol), and anhydrous cobalt(II) chloride (58.3 mg, 0.449 mmol), using General Procedure A at 65 °C for 33 h, gave **19** (186 mg, 79%) as a yellow oil;  $^1H$  NMR ( $CDCl_3$ )  $\delta$  7.78 (s, 1 H), 7.15 (br d,  $J = 8.9$  Hz, 2 H), 6.61 (br d,  $J = 8.9$  Hz, 2 H), 4.32-4.16 (m, 2 H), 3.92 (br t,  $J = 5.9$  Hz, 1 H), 3.17 (dd,  $J = 13.4, 7.2$  Hz, 1 H), 3.12 (dd,  $J = 13.3, 5.7$  Hz, 1 H), 2.12 (ddd,  $J = 13.8, 9.6, 6.1$  Hz, 1 H), 1.98 (ddd,  $J = 13.7, 9.8, 6.5$  Hz, 1 H), 1.88 (s, 1 H), 1.36 (s, 3 H); HRESIMS calcd for  $C_{14}H_{16}Cl_2N_4NaO_3$   $m/z$   $[M + Na]^+$  385.0441, 383.0465, 381.0492, found 385.0429, 383.0453, 381.0482.

**4-Chloro-*N*-[(7-methyl-2-nitro-6,7-dihydro-5*H*-imidazo[2,1-*b*][1,3]oxazin-7-**

**yl)methyl]aniline (20).** Reaction of alcohol **19** (184 mg, 0.512 mmol) and NaH (32.0 mg, 0.800 mmol), using General Procedure B at 20 °C for 3.5 h, gave **20** (25 mg, 15%) as a yellow-orange solid: mp ( $CH_2Cl_2$ /pentane) 179-182 °C;  $^1H$  NMR  $[(CD_3)_2SO]$   $\delta$  8.06 (s, 1 H), 7.07 (br d,  $J = 8.9$  Hz, 2 H), 6.71 (br d,  $J = 8.9$  Hz, 2 H), 6.03 (br t,  $J = 6.5$  Hz, 1 H), 4.15 (ddd,  $J = 13.1, 5.9, 4.7$  Hz, 1 H), 4.07 (ddd,  $J = 13.0, 9.7, 5.4$  Hz, 1 H), 3.36 (d,  $J = 6.5$  Hz, 2 H), 2.24 (ddd,  $J = 14.2, 9.8, 6.0$  Hz, 1 H), 2.07 (dt,  $J = 14.4, 4.9$  Hz, 1 H), 1.39 (s, 3 H). Anal. ( $C_{14}H_{15}ClN_4O_3$ ) C, H, N (see Table S4).

**4-(2-Chloro-4-nitro-1*H*-imidazol-1-yl)-1-[(4-fluorophenyl)amino]-2-methylbutan-2-ol (21).** Reaction of epoxide **16** (150 mg, 0.648 mmol), 4-fluoroaniline (85  $\mu$ L, 0.897 mmol), and anhydrous cobalt(II) chloride (49.3 mg, 0.380 mmol), using General Procedure A at 67 °C for 37 h, gave **21** (189 mg, 85%) as a yellow oil; <sup>1</sup>H NMR (CDCl<sub>3</sub>)  $\delta$  7.79 (s, 1 H), 6.91 (br dd,  $J$  = 8.9, 8.5 Hz, 2 H), 6.64 (br dd,  $J$  = 9.0, 4.3 Hz, 2 H), 4.32-4.16 (m, 2 H), 3.79 (br s, 1 H), 3.15 (d,  $J$  = 13.0 Hz, 1 H), 3.11 (d,  $J$  = 13.1 Hz, 1 H), 2.12 (ddd,  $J$  = 13.7, 9.9, 5.9 Hz, 1 H), 2.02 (br s, 1 H), 1.98 (ddd,  $J$  = 13.7, 10.0, 6.3 Hz, 1 H), 1.36 (s, 3 H); HRESIMS calcd for C<sub>14</sub>H<sub>17</sub>ClFN<sub>4</sub>O<sub>3</sub>  $m/z$  [M + H]<sup>+</sup> 345.0943, 343.0968, found 345.0942, 343.0967.

**4-Fluoro-*N*-[(7-methyl-2-nitro-6,7-dihydro-5*H*-imidazo[2,1-*b*][1,3]oxazin-7-yl)methyl]aniline (22).** Reaction of alcohol **21** (187 mg, 0.546 mmol) and NaH (30.0 mg, 0.750 mmol), using General Procedure B at 20 °C for 200 min, gave **22** (35 mg, 21%) as a yellow-orange solid: mp (CH<sub>2</sub>Cl<sub>2</sub>/pentane) 193 °C (dec); <sup>1</sup>H NMR [(CD<sub>3</sub>)<sub>2</sub>SO]  $\delta$  8.06 (s, 1 H), 6.90 (br t,  $J$  = 8.9 Hz, 2 H), 6.69 (br dd,  $J$  = 9.1, 4.6 Hz, 2 H), 5.73 (br t,  $J$  = 6.6 Hz, 1 H), 4.15 (ddd,  $J$  = 13.0, 5.9, 4.8 Hz, 1 H), 4.07 (ddd,  $J$  = 13.1, 9.6, 5.4 Hz, 1 H), 3.33 (d,  $J$  = 6.6 Hz, 2 H), 2.26 (ddd,  $J$  = 14.4, 9.5, 6.1 Hz, 1 H), 2.07 (dt,  $J$  = 14.3, 5.0 Hz, 1 H), 1.40 (s, 3 H). Anal. (C<sub>14</sub>H<sub>15</sub>FN<sub>4</sub>O<sub>3</sub>) C, H, N (see Table S4).

**4-(2-Chloro-4-nitro-1*H*-imidazol-1-yl)-1-{methyl[4-(trifluoromethoxy)phenyl]amino}-butan-2-ol (23).** Reaction of epoxide **13** (192 mg, 0.882 mmol), *N*-methyl-4-(trifluoromethoxy)aniline (253 mg, 1.32 mmol), and anhydrous cobalt(II) chloride (98 mg, 0.755 mmol), using General Procedure A at 65 °C for 64 h, gave **23** (170 mg, 47%) as a yellow oil; <sup>1</sup>H NMR (CDCl<sub>3</sub>)  $\delta$  7.83 (s, 1 H), 7.11 (br d,  $J$  = 9.2 Hz, 2 H), 6.78 (br d,  $J$  = 9.2 Hz, 2 H), 4.34-4.24 (m, 2 H), 3.91-3.82 (m, 1 H), 3.28 (dd,  $J$  = 14.6, 9.0 Hz, 1 H), 3.21 (dd,  $J$  = 14.5, 3.9 Hz, 1 H), 2.93 (s, 3 H), 2.46 (dd,  $J$  = 2.3, 1.7 Hz, 1 H), 2.07-1.95 (m, 1 H), 1.95-1.83 (m, 1 H); APCI MS calcd for C<sub>15</sub>H<sub>17</sub>ClF<sub>3</sub>N<sub>4</sub>O<sub>4</sub>  $m/z$  [M + H]<sup>+</sup> 411, 409, found 411, 409.

***N*-Methyl-*N*-[(2-nitro-6,7-dihydro-5*H*-imidazo[2,1-*b*][1,3]oxazin-7-yl)methyl]-4-(trifluoromethoxy)aniline (24).** Reaction of alcohol **23** (169 mg, 0.413 mmol) and NaH (108 mg, 2.70 mmol), using General Procedure B at 20 °C for 2 h, gave **24** (98 mg, 63%) as a pale yellow solid: mp 141-143 °C; <sup>1</sup>H NMR [(CD<sub>3</sub>)<sub>2</sub>SO]  $\delta$  8.06 (s, 1 H), 7.16 (br d,  $J$  = 8.5 Hz, 2 H), 6.82 (br d,  $J$  = 9.3 Hz, 2 H), 4.81-4.71 (m, 1 H), 4.14 (ddd,  $J$  = 12.6, 5.8, 2.4 Hz, 1 H), 4.03 (ddd,  $J$  = 12.4, 11.5, 5.0 Hz, 1 H), 3.77 (dd,  $J$  = 15.6, 4.0 Hz, 1 H), 3.67 (dd,  $J$  = 15.6, 7.6 Hz, 1 H), 3.01 (s, 3 H), 2.31-2.23 (m, 1 H), 2.10-1.97 (m, 1 H). Anal. (C<sub>15</sub>H<sub>15</sub>F<sub>3</sub>N<sub>4</sub>O<sub>4</sub>) C, H, N (see Table S4).

**4-(2-Chloro-4-nitro-1*H*-imidazol-1-yl)-2-methyl-1-{methyl[4-(trifluoromethoxy)phenyl]amino}butan-2-ol (25).** Reaction of epoxide **16** (400 mg, 1.73 mmol), *N*-methyl-4-(trifluoromethoxy)aniline (305  $\mu$ L, 2.07 mmol), and anhydrous cobalt(II) chloride (50.3 mg, 0.387 mmol), using General Procedure A at 67 °C for 45 h, gave **25** (589 mg, 81%) as a yellow oil; <sup>1</sup>H NMR (CDCl<sub>3</sub>)  $\delta$  7.78 (s, 1 H), 7.10 (br d,  $J$  = 9.2 Hz, 2 H), 6.83 (br d,  $J$  = 9.3 Hz, 2 H), 4.29 (ddd,  $J$  = 14.3, 9.9, 6.3 Hz, 1 H), 4.24 (ddd,  $J$  = 14.2, 9.6, 6.5 Hz, 1 H), 3.39 (d,  $J$  = 15.2 Hz, 1 H), 3.28 (d,  $J$  = 15.3 Hz, 1 H), 3.04 (s, 3 H), 2.07 (ddd,  $J$  = 13.6, 9.8, 6.1 Hz, 1 H), 1.97 (ddd,  $J$  = 13.6, 9.8, 6.4 Hz, 1 H), 1.89 (s, 1 H), 1.35 (s, 3 H); HRESIMS calcd for C<sub>16</sub>H<sub>18</sub>ClF<sub>3</sub>N<sub>4</sub>NaO<sub>4</sub>  $m/z$  [M + Na]<sup>+</sup> 447.0837, 445.0861, found 447.0829, 445.0851.

***N*-Methyl-*N*-[(7-methyl-2-nitro-6,7-dihydro-5*H*-imidazo[2,1-*b*][1,3]oxazin-7-yl)methyl]-4-(trifluoromethoxy)aniline (26).** Reaction of alcohol **25** (585 mg, 1.38 mmol) and NaH (87 mg, 2.18 mmol), using General Procedure B for 4 h, gave **26** (247 mg, 46%) as a light yellow solid: mp (Et<sub>2</sub>O/pentane triturate) 157-158 °C; <sup>1</sup>H NMR [(CD<sub>3</sub>)<sub>2</sub>SO]  $\delta$  8.06 (s, 1 H), 7.14 (br d,  $J$  = 8.6 Hz, 2 H), 6.87 (br d,  $J$  = 9.3 Hz, 2 H), 4.14 (ddd,  $J$  = 13.0, 5.4, 4.6 Hz, 1 H), 4.06

(ddd,  $J = 13.1, 8.9, 6.6$  Hz, 1 H), 3.71 (d,  $J = 16.2$  Hz, 1 H), 3.67 (d,  $J = 16.3$  Hz, 1 H), 2.98 (s, 3 H), 2.22-2.09 (m, 2 H), 1.36 (s, 3 H);  $^{13}\text{C}$  NMR  $[(\text{CD}_3)_2\text{SO}]$   $\delta$  148.9, 147.2, 142.2, 138.7 (q,  $J_{\text{C-F}} = 1.8$  Hz), 121.8 (2 C), 120.3 (q,  $J_{\text{C-F}} = 254.0$  Hz), 117.7, 112.5 (2 C), 84.4, 59.2, 40.2, 39.4, 27.3, 21.2. Anal. ( $\text{C}_{16}\text{H}_{17}\text{F}_3\text{N}_4\text{O}_4$ ) C, H, N (see Table S4).

**4-(2-Chloro-4-nitro-1*H*-imidazol-1-yl)-1-[(4-chlorophenyl)(methyl)amino]-2-methylbutan-2-ol (27).** Reaction of epoxide **16** (281 mg, 1.21 mmol), 4-chloro-*N*-methylaniline (240 mg, 1.69 mmol), and anhydrous cobalt(II) chloride (101 mg, 0.778 mmol), using General Procedure A at 75 °C for 24 h, gave **27** (427 mg, 94%) as a yellow oil;  $^1\text{H}$  NMR  $[(\text{CD}_3)_2\text{SO}]$   $\delta$  8.55 (s, 1 H), 7.13 (br d,  $J = 9.1$  Hz, 2 H), 6.78 (br d,  $J = 9.2$  Hz, 2 H), 4.71 (s, 1 H), 4.23-4.13 (m, 2 H), 3.35-3.24 (m, 2 H), 2.95 (s, 3 H), 2.02-1.84 (m, 2 H), 1.13 (s, 3 H); APCI MS calcd for  $\text{C}_{15}\text{H}_{18}\text{Cl}_3\text{N}_4\text{O}_3$   $m/z$   $[\text{M} + \text{Cl}]^-$  411, 409, 407, found 411, 409, 407.

**4-Chloro-*N*-methyl-*N*-[(7-methyl-2-nitro-6,7-dihydro-5*H*-imidazo[2,1-*b*][1,3]oxazin-7-yl)methyl]aniline (28).** Reaction of alcohol **27** (267 mg, 0.715 mmol) and NaH (57 mg, 1.43 mmol), using General Procedure B at 55 °C for 2 h, gave **28** (102 mg, 42%) as a yellow solid: mp 183-185 °C;  $^1\text{H}$  NMR  $[(\text{CD}_3)_2\text{SO}]$   $\delta$  8.06 (s, 1 H), 7.17 (br d,  $J = 9.0$  Hz, 2 H), 6.83 (br d,  $J = 9.1$  Hz, 2 H), 4.13 (ddd,  $J = 12.9, 5.3, 4.8$  Hz, 1 H), 4.06 (ddd,  $J = 13.1, 8.8, 6.7$  Hz, 1 H), 3.73-3.62 (m, 2 H), 2.96 (s, 3 H), 2.20-2.05 (m, 2 H), 1.35 (s, 3 H). Anal. ( $\text{C}_{15}\text{H}_{17}\text{ClN}_4\text{O}_3$ ) C, H, N (see Table S4).

**4-(2-Chloro-4-nitro-1*H*-imidazol-1-yl)-1-[(4-fluorophenyl)(methyl)amino]-2-methylbutan-2-ol (29).** Reaction of epoxide **16** (378 mg, 1.63 mmol), 4-fluoro-*N*-methylaniline (285 mg, 2.28 mmol), and anhydrous cobalt(II) chloride (111 mg, 0.855 mmol), using General Procedure A at 75 °C for 24 h, gave **29** (565 mg, 97%) as a yellow oil;  $^1\text{H}$  NMR ( $\text{CDCl}_3$ )  $\delta$  7.77 (s, 1 H), 6.96 (br dd,  $J = 9.3, 8.2$  Hz, 2 H), 6.82 (br dd,  $J = 9.3, 4.3$  Hz, 2 H), 4.33-4.18 (m, 2 H), 3.32 (d,  $J = 15.2$  Hz, 1 H), 3.23 (d,  $J = 15.1$  Hz, 1 H), 2.99 (s, 3 H), 2.11-2.01 (m, 2 H), 2.01-1.91 (m, 1 H), 1.34 (s, 3 H); APCI MS calcd for  $\text{C}_{15}\text{H}_{19}\text{ClFN}_4\text{O}_3$   $m/z$   $[\text{M} + \text{H}]^+$  359, 357, found 359, 357.

**4-Fluoro-*N*-methyl-*N*-[(7-methyl-2-nitro-6,7-dihydro-5*H*-imidazo[2,1-*b*][1,3]oxazin-7-yl)methyl]aniline (30).** Reaction of alcohol **29** (563 mg, 1.58 mmol) and NaH (101 mg, 2.53 mmol), using General Procedure B at 50 °C for 3 h, gave **30** (137 mg, 27%) as a yellow solid: mp 149-151 °C;  $^1\text{H}$  NMR  $[(\text{CD}_3)_2\text{SO}]$   $\delta$  8.06 (s, 1 H), 7.00 (br dd,  $J = 9.1, 8.7$  Hz, 2 H), 6.82 (br dd,  $J = 9.3, 4.4$  Hz, 2 H), 4.14 (ddd,  $J = 13.0, 5.7, 4.3$  Hz, 1 H), 4.06 (ddd,  $J = 13.0, 9.6, 5.9$  Hz, 1 H), 3.65 (d,  $J = 16.1$  Hz, 1 H), 3.60 (d,  $J = 16.2$  Hz, 1 H), 2.94 (s, 3 H), 2.23-2.07 (m, 2 H), 1.36 (s, 3 H). Anal. ( $\text{C}_{15}\text{H}_{17}\text{FN}_4\text{O}_3$ ) C, H, N (see Table S4).

***N*-[6-(Trifluoromethyl)pyridin-3-yl]formamide (32).** A mixture of formic acid (1.25 mL, 33.1 mmol) and acetic anhydride (2.5 mL, 26.5 mmol) was stirred at 50 °C for 2 h, then cooled to 20 °C and added to a solution of 6-(trifluoromethyl)pyridin-3-amine (**31**) (821 mg, 5.06 mmol) in anhydrous THF (2 mL) under  $\text{N}_2$ , rinsing in residues with additional anhydrous THF (2 mL). The mixture was stirred at 20 °C for 23 h and then added to ice/aq  $\text{NaHCO}_3$  (100 mL) and extracted with  $\text{CH}_2\text{Cl}_2$  (6 x 100 mL). The combined extracts were evaporated to dryness under reduced pressure (at 30 °C) and the residue was chromatographed on silica gel. Elution with 0-0.5% MeOH/ $\text{CH}_2\text{Cl}_2$  first gave foreruns, and then further elution with 0.5-1% MeOH/ $\text{CH}_2\text{Cl}_2$  gave **32** (930 mg, 97%) as a white solid: mp ( $\text{CH}_2\text{Cl}_2$ /hexane) 110-113 °C;  $^1\text{H}$  NMR ( $\text{CDCl}_3$ )  $\delta$  8.67 (d,  $J = 2.4$  Hz, 1 H), 8.51 (d,  $J = 0.9$  Hz, 1 H), 8.44 (dd,  $J = 8.6, 2.3$  Hz, 1 H), 7.70 (d,  $J = 8.6$  Hz, 1 H), 7.45 (br s, 1 H). Anal. ( $\text{C}_7\text{H}_5\text{F}_3\text{N}_2\text{O}$ ) C, H, N (see Table S4).



***N*-Methyl-6-(trifluoromethyl)pyridin-3-amine (33).** Borane-dimethyl sulfide complex (5.4 mL of 2 M solution in THF, 10.8 mmol) was added dropwise to a stirred solution of formamide **32** (800 mg, 4.21 mmol) in anhydrous THF (3 mL) under N<sub>2</sub> at 0 °C. The mixture was stirred at 20 °C for 30 min and then at 65 °C for 3.5 h, before being recooled to 0 °C. MeOH (2.2 mL) was added, and the mixture was stirred at 0-20 °C for 22 h, then saturated with anhydrous HCl gas and stirred at 65 °C for 1 h. After cooling to 20 °C, MeOH (20 mL) was added, and the solvents were removed under reduced pressure (at 30 °C). The oily residue was treated with 2 M NaOH (30 mL) and water (20 mL) and extracted with CH<sub>2</sub>Cl<sub>2</sub> (4 x 50 mL). The combined extracts were evaporated to dryness under reduced pressure (at 30 °C) and the residue was chromatographed on silica gel. Elution with CH<sub>2</sub>Cl<sub>2</sub> first gave foreruns and then **33**<sup>S6</sup> (533 mg, 72%) as a colourless oil; <sup>1</sup>H NMR (CDCl<sub>3</sub>) δ 8.06 (d, *J* = 2.8 Hz, 1 H), 7.47 (d, *J* = 8.6 Hz, 1 H), 6.88 (dd, *J* = 8.6, 2.8 Hz, 1 H), 4.16 (br s, 1 H), 2.91 (d, *J* = 5.2 Hz, 3 H); HRESIMS calcd for C<sub>7</sub>H<sub>8</sub>F<sub>3</sub>N<sub>2</sub> *m/z* [M + H]<sup>+</sup> 177.0634, found 177.0631.

**4-(2-Chloro-4-nitro-1*H*-imidazol-1-yl)-2-methyl-1-{methyl[6-(trifluoromethyl)pyridin-3-yl]amino}butan-2-ol (34).** Reaction of epoxide **16** (293 mg, 1.26 mmol), methylaminopyridine **33** (536 mg, 3.04 mmol), and anhydrous cobalt(II) chloride (125 mg, 0.963 mmol), using General Procedure A at 70 °C for 3 d, gave **34** (89 mg, 17%) as a yellow oil; <sup>1</sup>H NMR (CDCl<sub>3</sub>) δ 8.31 (d, *J* = 3.0 Hz, 1 H), 7.80 (s, 1 H), 7.49 (d, *J* = 8.9 Hz, 1 H), 7.16 (dd, *J* = 8.8, 2.9 Hz, 1 H), 4.35-4.19 (m, 2 H), 3.52 (d, *J* = 15.4 Hz, 1 H), 3.39 (d, *J* = 15.4 Hz, 1 H), 3.14 (s, 3 H), 2.15-2.05 (m, 1 H), 2.04-1.93 (m, 1 H), 1.86 (s, 1 H), 1.38 (s, 3 H); APCI MS calcd for C<sub>15</sub>H<sub>17</sub>Cl<sub>2</sub>F<sub>3</sub>N<sub>5</sub>O<sub>3</sub> *m/z* [M + Cl]<sup>-</sup> 444, 442, found 444, 442.

***N*-Methyl-*N*-[(7-methyl-2-nitro-6,7-dihydro-5*H*-imidazo[2,1-*b*][1,3]oxazin-7-yl)methyl]-6-(trifluoromethyl)pyridin-3-amine (35).** Reaction of alcohol **34** (103 mg, 0.253 mmol) and NaH (15 mg, 0.375 mmol), using General Procedure B at 70 °C for 2 h, gave **35** (44 mg, 47%) as a pale yellow solid: mp (Et<sub>2</sub>O/CH<sub>2</sub>Cl<sub>2</sub>/pentane triturate) 106-109 °C; <sup>1</sup>H NMR (CDCl<sub>3</sub>) δ 8.22 (d, *J* = 3.0 Hz, 1 H), 7.52 (d, *J* = 8.8 Hz, 1 H), 7.45 (s, 1 H), 7.11 (dd, *J* = 8.9, 3.0 Hz, 1 H), 4.19-4.06 (m, 2 H), 3.79 (d, *J* = 16.1 Hz, 1 H), 3.74 (d, *J* = 16.1 Hz, 1 H), 3.18 (s, 3 H), 2.30 (ddd, *J* = 14.2, 9.9, 8.1 Hz, 1 H), 2.05 (ddd, *J* = 14.2, 4.3, 3.3 Hz, 1 H), 1.48 (s, 3 H); HRESIMS calcd for C<sub>15</sub>H<sub>17</sub>F<sub>3</sub>N<sub>5</sub>O<sub>3</sub> *m/z* [M + H]<sup>+</sup> 372.1278, found 372.1271; HPLC purity: 97.8%.

#### *Synthesis of benzylamine 40 (Scheme 2A)*

**1-Azido-4-(2-chloro-4-nitro-1*H*-imidazol-1-yl)-2-methylbutan-2-ol (36).** A mixture of epoxide **16** (281 mg, 1.21 mmol), sodium azide (332 mg, 5.11 mmol), and *N*-cetyl-*N,N,N*-trimethylammonium bromide (446 mg, 1.22 mmol) in MeOH (10 mL) was stirred at 20 °C for 45 min and then at 40 °C for 17 h. The resulting cooled mixture was treated with excess NaHCO<sub>3</sub> (0.15 g, 1.79 mmol), then added to brine (50 mL), and extracted with CH<sub>2</sub>Cl<sub>2</sub> (5 x 50 mL). The combined extracts were evaporated to dryness under reduced pressure (at 30 °C) and the residue was chromatographed on silica gel. Elution with 0-0.25% MeOH/CH<sub>2</sub>Cl<sub>2</sub> first gave foreruns and then further elution with 0.25% MeOH/CH<sub>2</sub>Cl<sub>2</sub> gave **36** (242 mg, 73%) as a colourless oil; <sup>1</sup>H NMR (CDCl<sub>3</sub>) δ 7.80 (s, 1 H), 4.28-4.13 (m, 2 H), 3.39 (d, *J* = 12.2 Hz, 1 H), 3.34 (d, *J* = 12.2 Hz, 1 H), 2.06 (ddd, *J* = 13.7, 9.5, 6.4 Hz, 1 H), 1.94 (s, 1 H), 1.92 (ddd, *J* = 13.8, 9.5, 6.7 Hz, 1 H), 1.32 (s, 3 H); HRESIMS calcd for C<sub>8</sub>H<sub>12</sub>ClN<sub>6</sub>O<sub>3</sub> *m/z* [M + H]<sup>+</sup> 277.0627, 275.0654, found 277.0632, 275.0648.

**7-(Azidomethyl)-7-methyl-2-nitro-6,7-dihydro-5*H*-imidazo[2,1-*b*][1,3]oxazine (37).** Reaction of alcohol **36** (2.42 g, 8.81 mmol) and NaH (508 mg, 12.7 mmol), using General Procedure B for 2.5 h, gave **37** (1.48 g, 70%) as a cream solid: mp (CH<sub>2</sub>Cl<sub>2</sub>/pentane) 138-139

°C; <sup>1</sup>H NMR (CDCl<sub>3</sub>) δ 7.45 (s, 1 H), 4.15 (ddd, *J* = 12.7, 6.2, 4.9 Hz, 1 H), 4.09 (ddd, *J* = 12.8, 9.3, 5.5 Hz, 1 H), 3.59 (d, *J* = 12.9 Hz, 1 H), 3.47 (d, *J* = 12.9 Hz, 1 H), 2.39 (ddd, *J* = 14.4, 9.2, 6.2 Hz, 1 H), 2.05 (dt, *J* = 14.4, 5.1 Hz, 1 H), 1.49 (s, 3 H). Anal. (C<sub>8</sub>H<sub>10</sub>N<sub>6</sub>O<sub>3</sub>) C, H, N (see Table S4).

**1-(7-Methyl-2-nitro-6,7-dihydro-5H-imidazo[2,1-*b*][1,3]oxazin-7-yl)methanamine (38) and *N*-[(7-methyl-2-nitro-6,7-dihydro-5H-imidazo[2,1-*b*][1,3]oxazin-7-yl)methyl]-1,1,1-triphenyl-λ<sup>5</sup>-phosphanimine (39).** Triphenylphosphine (605 mg, 2.31 mmol) was added to a suspension of azide **37** (181 mg, 0.760 mmol) in dioxane (13.5 mL) and water (1.5 mL) at 12 °C. The mixture was stirred at 20 °C for 24 h in a sealed vial, then transferred to a flask (in MeOH/CH<sub>2</sub>Cl<sub>2</sub>) and evaporated to dryness under reduced pressure (at 30 °C), and the residue was chromatographed on silica gel. Elution with 0-5% MeOH/CH<sub>2</sub>Cl<sub>2</sub> first gave foreruns, and then further elution with 5-6% MeOH/CH<sub>2</sub>Cl<sub>2</sub> gave **38** (78 mg, 48%) as a light yellow solid (following Et<sub>2</sub>O trituration): mp 118-120 °C; <sup>1</sup>H NMR [(CD<sub>3</sub>)<sub>2</sub>SO] δ 8.05 (s, 1 H), 4.11 (dt, *J* = 13.0, 5.9 Hz, 1 H), 4.04 (ddd, *J* = 13.1, 8.4, 5.5 Hz, 1 H), 2.76 (d, *J* = 13.5 Hz, 1 H), 2.71 (d, *J* = 13.5 Hz, 1 H), 2.22 (ddd, *J* = 14.4, 8.4, 6.0 Hz, 1 H), 1.97 (dt, *J* = 14.4, 5.6 Hz, 1 H), 1.79 (br s, 2 H), 1.32 (s, 3 H); HRESIMS calcd for C<sub>8</sub>H<sub>12</sub>N<sub>4</sub>NaO<sub>3</sub> *m/z* [M + Na]<sup>+</sup> 235.0802, found 235.0791.

Further elution of the above column with 6-7% MeOH/CH<sub>2</sub>Cl<sub>2</sub> gave a mixture of **38** and **39** (24 mg) and then elution with 10% MeOH/CH<sub>2</sub>Cl<sub>2</sub> containing 1% concd NH<sub>3</sub> gave crude **39** (114 mg, 32%) as a light orange solid (following Et<sub>2</sub>O/pentane trituration): mp 135 °C (dec); <sup>1</sup>H NMR [(CD<sub>3</sub>)<sub>2</sub>SO] δ 8.03 (s, 1 H), 7.92-7.71 (m, 15 H), 4.08 (dt, *J* = 13.1, 5.6 Hz, 1 H), 4.00 (ddd, *J* = 13.2, 8.8, 5.4 Hz, 1 H), 3.27 (d, <sup>3</sup>*J*<sub>H-P</sub> = 10.9 Hz, 2 H), 2.20 (ddd, *J* = 14.4, 8.6, 6.1 Hz, 1 H), 1.93 (dt, *J* = 14.4, 5.2 Hz, 1 H), 1.20 (s, 3 H); HRESIMS calcd for C<sub>26</sub>H<sub>26</sub>N<sub>4</sub>O<sub>3</sub>P *m/z* [M + H]<sup>+</sup> 473.1737, found 473.1735.

**1-(7-Methyl-2-nitro-6,7-dihydro-5H-imidazo[2,1-*b*][1,3]oxazin-7-yl)-*N*-[4-(trifluoromethoxy)benzyl]methanamine (40).** 4-(Trifluoromethoxy)benzaldehyde (60 μL, 0.420 mmol) was added to a mixture of amine **38** (26.5 mg, 0.125 mmol) and AcOH (25 μL, 0.437 mmol) in anhydrous DMF (1.8 mL) under N<sub>2</sub>. The mixture was stirred at 20 °C for 20 min and then cooled to 0 °C. Sodium cyanoborohydride (30 mg, 0.477 mmol) was added and the mixture was quickly degassed and resealed under N<sub>2</sub>, and then stirred at 20 °C for 21 h. The resulting mixture was rapidly cooled (CO<sub>2</sub>/acetone), quenched with ice/aqueous sodium carbonate (10 mL), added to brine (40 mL), and extracted with CH<sub>2</sub>Cl<sub>2</sub> (5 x 50 mL) and EtOAc (50 mL). The combined extracts were evaporated to dryness under reduced pressure (at 30 °C) and the residue was chromatographed on silica gel. Elution with 0-0.4% MeOH/CH<sub>2</sub>Cl<sub>2</sub> first gave foreruns, and then further elution with 0.5-0.6% MeOH/CH<sub>2</sub>Cl<sub>2</sub> gave **40** (24 mg, 50%) as a light yellow solid: mp (CH<sub>2</sub>Cl<sub>2</sub>/pentane) 70-71 °C; <sup>1</sup>H NMR (CDCl<sub>3</sub>) δ 7.42 (s, 1 H), 7.33 (br d, *J* = 8.6 Hz, 2 H), 7.17 (br d, *J* = 7.9 Hz, 2 H), 4.06 (dd, *J* = 8.1, 4.9 Hz, 2 H), 3.84 (s, 2 H), 2.90 (d, *J* = 12.7 Hz, 1 H), 2.78 (d, *J* = 12.7 Hz, 1 H), 2.55 (dt, *J* = 14.6, 8.0 Hz, 1 H), 1.95 (dt, *J* = 14.4, 4.9 Hz, 1 H), 1.45 (s, 3 H); <sup>13</sup>C NMR (CDCl<sub>3</sub>) δ 148.5, 147.9, 144.0, 138.8, 129.5 (2 C), 121.2 (2 C), 120.7 (q, *J*<sub>C-F</sub> = 257.3 Hz), 114.5, 81.9, 56.8, 53.3, 40.0, 28.4, 22.7; HRESIMS calcd for C<sub>16</sub>H<sub>18</sub>F<sub>3</sub>N<sub>4</sub>O<sub>4</sub> *m/z* [M + H]<sup>+</sup> 387.1275, found 387.1276; HPLC purity: 97.4%.

### *Syntheses of amides 43-48 (Scheme 2B)*

**7-(Azidomethyl)-2-nitro-6,7-dihydro-5H-imidazo[2,1-*b*][1,3]oxazine (42).** Diethyl azodicarboxylate (0.175 mL, 1.13 mmol) was added dropwise to a stirred solution of (2-nitro-

6,7-dihydro-5*H*-imidazo[2,1-*b*][1,3]oxazin-7-yl)methanol<sup>S1</sup> (**41**) (200 mg, 1.00 mmol) and triphenylphosphine (291 mg, 1.11 mmol) in anhydrous DMF (2 mL) under N<sub>2</sub> at 0 °C. The mixture was stirred at 0 °C for 30 min and then diphenylphosphoryl azide (0.250 mL, 1.16 mmol) was added dropwise. After being stirred at 0 °C for 1 h and then at 20 °C for 44 h, the mixture was concentrated under reduced pressure (at 30 °C) to give an oil, which was chromatographed on silica gel. Elution with 0-50% EtOAc/petroleum ether first gave foreruns, and then further elution with 50-75% EtOAc/petroleum ether gave the crude product, which was further purified by chromatography on silica gel. Elution with 0-1% EtOAc/CH<sub>2</sub>Cl<sub>2</sub> first gave foreruns, and then further elution with 1-3% EtOAc/CH<sub>2</sub>Cl<sub>2</sub> gave **42** (187 mg, 83%) as a white solid: mp (CH<sub>2</sub>Cl<sub>2</sub>/hexane) 98-101 °C; <sup>1</sup>H NMR (CDCl<sub>3</sub>) δ 7.44 (s, 1 H), 4.59-4.49 (m, 1 H), 4.18 (ddd, *J* = 12.5, 5.4, 3.2 Hz, 1 H), 4.10 (ddd, *J* = 12.5, 10.5, 6.0 Hz, 1 H), 3.68 (dd, *J* = 13.3, 4.9 Hz, 1 H), 3.64 (dd, *J* = 13.2, 4.9 Hz, 1 H), 2.37-2.22 (m, 2 H). Anal. (C<sub>7</sub>H<sub>8</sub>N<sub>6</sub>O<sub>3</sub>) C, H, N (see Table S4).

***N*-[(2-Nitro-6,7-dihydro-5*H*-imidazo[2,1-*b*][1,3]oxazin-7-yl)methyl]-4-(trifluoromethoxy)benzamide (43)**. Reaction of azide **42** (40.7 mg, 0.182 mmol) with 4-(trifluoromethoxy)benzoyl chloride (60 μL, 0.381 mmol) and triphenylphosphine (61.0 mg, 0.233 mmol), using General Procedure C for 130 min, gave **43** (35.5 mg, 51%) as a cream solid: mp (Et<sub>2</sub>O/pentane triturate) 89-91 °C (dec); <sup>1</sup>H NMR (CDCl<sub>3</sub>) δ 7.85 (br d, *J* = 8.8 Hz, 2 H), 7.44 (s, 1 H), 7.29 (br d, *J* = 8.8 Hz, 2 H), 6.82 (br t, *J* = 5.9 Hz, 1 H), 4.70-4.60 (m, 1 H), 4.22-4.01 (m, 3 H), 3.69 (ddd, *J* = 14.5, 7.1, 5.6 Hz, 1 H), 2.42-2.32 (m, 1 H), 2.27-2.12 (m, 1 H). Anal. (C<sub>15</sub>H<sub>13</sub>F<sub>3</sub>N<sub>4</sub>O<sub>5</sub>·0.5H<sub>2</sub>O) C, H, N (see Table S4). HPLC purity: 99.8%.

***N*-[(7-Methyl-2-nitro-6,7-dihydro-5*H*-imidazo[2,1-*b*][1,3]oxazin-7-yl)methyl]-4-(trifluoromethoxy)benzamide (44)**. Reaction of azide **37** (120 mg, 0.504 mmol) with 4-(trifluoromethoxy)benzoyl chloride (160 μL, 1.02 mmol) and triphenylphosphine (161 mg, 0.614 mmol), using General Procedure C, gave **44** (148 mg, 73%) as a pale yellow solid: mp (Et<sub>2</sub>O/pentane triturate) 99-100 °C (dec); <sup>1</sup>H NMR [(CD<sub>3</sub>)<sub>2</sub>SO] δ 8.85 (br t, *J* = 6.0 Hz, 1 H), 8.08 (s, 1 H), 8.01 (br d, *J* = 8.6 Hz, 2 H), 7.47 (br d, *J* = 8.3 Hz, 2 H), 4.21 (dt, *J* = 13.1, 5.3 Hz, 1 H), 4.07 (ddd, *J* = 13.0, 8.1, 5.4 Hz, 1 H), 3.64 (dd, *J* = 14.1, 5.9 Hz, 1 H), 3.59 (dd, *J* = 14.1, 6.2 Hz, 1 H), 2.18 (ddd, *J* = 14.3, 8.2, 6.1 Hz, 1 H), 2.08 (dt, *J* = 14.3, 5.2 Hz, 1 H), 1.39 (s, 3 H); <sup>13</sup>C NMR [(CD<sub>3</sub>)<sub>2</sub>SO] δ 165.9, 150.3, 147.3, 142.2, 133.3, 129.8 (2 C), 120.6 (2 C), 119.9 (q, *J*<sub>C-F</sub> = 257.1 Hz), 117.7, 81.8, 46.0, 39.5, 27.4, 22.1. Anal. (C<sub>16</sub>H<sub>15</sub>F<sub>3</sub>N<sub>4</sub>O<sub>5</sub>·0.5H<sub>2</sub>O) C, H, N (see Table S4). HPLC purity: 98.7%.

***N*-[(7-Methyl-2-nitro-6,7-dihydro-5*H*-imidazo[2,1-*b*][1,3]oxazin-7-yl)methyl]-3-(trifluoromethoxy)benzamide (45)**. Propane-1,3-dithiol (106 μL, 1.06 mmol) was added to a mixture of azide **37** (126 mg, 0.529 mmol) and triethylamine (150 μL, 1.08 mmol) in anhydrous MeOH (2.5 mL) under N<sub>2</sub> at 15 °C. After being stirred at 20 °C for 45 min, the mixture was diluted with anhydrous CH<sub>2</sub>Cl<sub>2</sub> (2 mL), and stirring was continued for 7 h. Further triethylamine (230 μL, 1.65 mmol) and propane-1,3-dithiol (160 μL, 1.59 mmol) were added, and the mixture was stirred at 20 °C for 4 h. The resulting mixture was then added to excess petroleum ether (100 mL) above the top of a silica gel column (20 g packed in petroleum ether), rinsing on with minimal 10% MeOH/CH<sub>2</sub>Cl<sub>2</sub>. Elution with 0-75% CH<sub>2</sub>Cl<sub>2</sub>/petroleum ether and 0-3% MeOH/CH<sub>2</sub>Cl<sub>2</sub> first gave foreruns, and then further elution with 3-5% MeOH/CH<sub>2</sub>Cl<sub>2</sub> gave crude amine **38** (93 mg, 83%) as a yellow solid, which was dissolved in anhydrous DMF (2 mL), sealed under N<sub>2</sub>, and cooled in an ice bath. *N,N*-Diisopropylethylamine (185 μL, 1.06 mmol) and 3-(trifluoromethoxy)benzoyl chloride (105 mg, 0.468 mmol) were added, and the mixture was stirred at 20 °C for 19 h. The reaction was quenched with ice (5 mL), then added to brine (40 mL) and extracted with CH<sub>2</sub>Cl<sub>2</sub> (5 x 50

mL). The combined extracts were evaporated to dryness under reduced pressure (at 30 °C) and the residue was chromatographed on silica gel. Elution with 0-0.5% MeOH/CH<sub>2</sub>Cl<sub>2</sub> first gave foreruns, and then further elution with 0.5-0.67% MeOH/CH<sub>2</sub>Cl<sub>2</sub> gave **45** (80 mg, 46%) as a cream solid: mp (Et<sub>2</sub>O/pentane triturate) 160-161 °C; <sup>1</sup>H NMR [(CD<sub>3</sub>)<sub>2</sub>SO] δ 8.91 (br t, *J* = 6.2 Hz, 1 H), 8.08 (s, 1 H), 7.94 (dt, *J* = 7.7, 1.2 Hz, 1 H), 7.86-7.82 (m, 1 H), 7.63 (t, *J* = 7.9 Hz, 1 H), 7.59-7.54 (m, 1 H), 4.21 (dt, *J* = 13.0, 5.6 Hz, 1 H), 4.07 (ddd, *J* = 13.1, 8.7, 5.6 Hz, 1 H), 3.65 (dd, *J* = 14.0, 6.4 Hz, 1 H), 3.60 (dd, *J* = 14.0, 6.2 Hz, 1 H), 2.18 (ddd, *J* = 14.5, 8.6, 5.9 Hz, 1 H), 2.09 (dt, *J* = 14.4, 5.4 Hz, 1 H), 1.40 (s, 3 H); <sup>13</sup>C NMR [(CD<sub>3</sub>)<sub>2</sub>SO] δ 165.5, 148.2 (q, *J*<sub>C-F</sub> = 1.9 Hz), 147.3, 142.2, 136.3, 130.5, 126.6, 123.9, 120.04 (q, *J*<sub>C-F</sub> = 256.8 Hz), 119.97, 117.7, 81.8, 46.1, 39.5, 27.4, 22.1. Anal. (C<sub>16</sub>H<sub>15</sub>F<sub>3</sub>N<sub>4</sub>O<sub>5</sub>) C, H, N (see Table S4).

***N*-[(7-Methyl-2-nitro-6,7-dihydro-5*H*-imidazo[2,1-*b*][1,3]oxazin-7-yl)methyl]-2-(trifluoromethoxy)benzamide (46)**. Reaction of azide **37** (119 mg, 0.500 mmol) with 2-(trifluoromethoxy)benzoyl chloride (230 mg, 1.02 mmol) and triphenylphosphine (161 mg, 0.614 mmol), using General Procedure C for 90 min, gave **46** (163 mg, 82%) as a cream foam (after trituration in Et<sub>2</sub>O/pentane and drying under vacuum); <sup>1</sup>H NMR (CDCl<sub>3</sub>) δ 7.89 (dd, *J* = 7.8, 1.8 Hz, 1 H), 7.54 (ddd, *J* = 8.2, 7.6, 1.7 Hz, 1 H), 7.45 (s, 1 H), 7.41 (td, *J* = 7.6, 1.0 Hz, 1 H), 7.33 (br dd, *J* = 8.3, 1.2 Hz, 1 H), 6.85 (br t, *J* = 5.9 Hz, 1 H), 4.21 (ddd, *J* = 12.8, 6.2, 3.8 Hz, 1 H), 4.11 (ddd, *J* = 12.7, 10.4, 5.4 Hz, 1 H), 3.86 (dd, *J* = 14.3, 6.7 Hz, 1 H), 3.81 (dd, *J* = 14.4, 6.2 Hz, 1 H), 2.33 (ddd, *J* = 14.6, 10.3, 6.2 Hz, 1 H), 2.12 (ddd, *J* = 14.6, 5.3, 3.8 Hz, 1 H), 1.51 (s, 3 H). Anal. (C<sub>16</sub>H<sub>15</sub>F<sub>3</sub>N<sub>4</sub>O<sub>5</sub>·0.25Et<sub>2</sub>O) C, H, N (see Table S4). HPLC purity: 99.7%.

***N*-[(7-Methyl-2-nitro-6,7-dihydro-5*H*-imidazo[2,1-*b*][1,3]oxazin-7-yl)methyl]-2-[4-(trifluoromethoxy)phenyl]acetamide (47)**. Reaction of azide **37** (121 mg, 0.508 mmol) with [4-(trifluoromethoxy)phenyl]acetyl chloride<sup>S7</sup> (252 mg, 1.06 mmol) and triphenylphosphine (159 mg, 0.606 mmol), using General Procedure C, gave **47** (176 mg, 84%) as a cream solid: mp (CH<sub>2</sub>Cl<sub>2</sub>/pentane) 139-141 °C; <sup>1</sup>H NMR [(CD<sub>3</sub>)<sub>2</sub>SO] δ 8.43 (br t, *J* = 6.1 Hz, 1 H), 8.06 (s, 1 H), 7.38 (br d, *J* = 8.7 Hz, 2 H), 7.28 (br d, *J* = 7.9 Hz, 2 H), 4.14 (dt, *J* = 13.1, 5.5 Hz, 1 H), 4.04 (ddd, *J* = 13.1, 8.6, 5.6 Hz, 1 H), 3.56 (d, *J* = 14.6 Hz, 1 H), 3.52 (d, *J* = 14.5 Hz, 1 H), 3.43 (dd, *J* = 14.1, 6.2 Hz, 1 H), 3.38 (dd, *J* = 14.2, 6.2 Hz, 1 H), 2.07 (ddd, *J* = 14.5, 8.6, 5.9 Hz, 1 H), 1.99 (dt, *J* = 14.4, 5.5 Hz, 1 H), 1.30 (s, 3 H); <sup>13</sup>C NMR [(CD<sub>3</sub>)<sub>2</sub>SO] δ 170.5, 147.2, 147.0 (q, *J*<sub>C-F</sub> = 1.6 Hz), 142.2, 135.8, 130.8 (2 C), 120.8 (2 C), 120.1 (q, *J*<sub>C-F</sub> = 255.8 Hz), 117.7, 81.6, 45.5, 41.2, 39.5, 27.2, 21.8; HRESIMS calcd for C<sub>17</sub>H<sub>18</sub>F<sub>3</sub>N<sub>4</sub>O<sub>5</sub> *m/z* [M + H]<sup>+</sup> 415.1224, found 415.1232; HPLC purity: 100%.

***N*-[(7-Methyl-2-nitro-6,7-dihydro-5*H*-imidazo[2,1-*b*][1,3]oxazin-7-yl)methyl]-2-[4-(trifluoromethoxy)phenoxy]acetamide (48)**. Reaction of azide **37** (139 mg, 0.584 mmol) with [4-(trifluoromethoxy)phenoxy]acetyl chloride (312 mg, 1.23 mmol) and triphenylphosphine (186 mg, 0.709 mmol), using General Procedure C for 95 min, gave **48** (200 mg, 80%) as a cream solid: mp (MeOH/CH<sub>2</sub>Cl<sub>2</sub>/hexane) 198-200 °C; <sup>1</sup>H NMR (CDCl<sub>3</sub>) δ 7.44 (s, 1 H), 7.18 (br d, *J* = 9.1 Hz, 2 H), 6.99 (br t, *J* = 6.3 Hz, 1 H), 6.95 (br d, *J* = 9.2 Hz, 2 H), 4.56 (d, *J* = 15.2 Hz, 1 H), 4.52 (d, *J* = 15.2 Hz, 1 H), 4.14 (ddd, *J* = 12.8, 6.5, 3.5 Hz, 1 H), 4.08 (ddd, *J* = 12.8, 10.5, 5.3 Hz, 1 H), 3.73 (dd, *J* = 14.4, 6.7 Hz, 1 H), 3.68 (dd, *J* = 14.4, 6.5 Hz, 1 H), 2.17 (ddd, *J* = 14.5, 10.3, 6.5 Hz, 1 H), 2.05 (ddd, *J* = 14.5, 5.2, 3.5 Hz, 1 H), 1.43 (s, 3 H); HRESIMS calcd for C<sub>17</sub>H<sub>18</sub>F<sub>3</sub>N<sub>4</sub>O<sub>6</sub> *m/z* [M + H]<sup>+</sup> 431.1173, found 431.1186; HPLC purity: 100%.

**Syntheses of ureas 49-53 (Scheme 2C and 2D)**

**1-[(2-Nitro-6,7-dihydro-5H-imidazo[2,1-b][1,3]oxazin-7-yl)methyl]-3-[4-(trifluoromethoxy)phenyl]urea (49) and 1,3-bis[(2-nitro-6,7-dihydro-5H-imidazo[2,1-b][1,3]oxazin-7-yl)methyl]urea (50).** Reaction of azide **42** (137 mg, 0.611 mmol) with 4-(trifluoromethoxy)aniline (250  $\mu$ L, 1.86 mmol), triphenylphosphine (282 mg, 1.08 mmol) and triethylammonium bicarbonate (1 mL of  $\sim$ 2 M,  $\sim$ 2.0 mmol), using General Procedure D, gave (via chromatography on silica gel, eluting with 1% MeOH/CH<sub>2</sub>Cl<sub>2</sub>) **49** (41 mg, 17%) as a light yellow solid: mp (Et<sub>2</sub>O/pentane triturate) 126 °C (dec); <sup>1</sup>H NMR [(CD<sub>3</sub>)<sub>2</sub>SO]  $\delta$  8.82 (br s, 1 H), 8.07 (s, 1 H), 7.49 (br d,  $J$  = 9.1 Hz, 2 H), 7.23 (br d,  $J$  = 8.4 Hz, 2 H), 6.55 (br t,  $J$  = 5.9 Hz, 1 H), 4.63-4.53 (m, 1 H), 4.14 (ddd,  $J$  = 12.5, 5.8, 2.6 Hz, 1 H), 4.05 (ddd,  $J$  = 12.5, 11.3, 5.0 Hz, 1 H), 3.52 (ddd,  $J$  = 14.3, 6.0, 4.5 Hz, 1 H), 3.43 (dt,  $J$  = 14.3, 6.2 Hz, 1 H), 2.28-2.14 (m, 1 H), 2.07-1.90 (m, 1 H); <sup>13</sup>C NMR [(CD<sub>3</sub>)<sub>2</sub>SO]  $\delta$  155.1, 147.9, 142.1 (q,  $J_{C-F}$  = 1.6 Hz), 142.0, 139.6, 121.6 (2 C), 120.2 (q,  $J_{C-F}$  = 254.8 Hz), 118.7 (2 C), 117.8, 77.3, 42.1, 41.7, 23.4. Anal. (C<sub>15</sub>H<sub>14</sub>F<sub>3</sub>N<sub>5</sub>O<sub>5</sub>) C, H, N (see Table S4).

Further elution of the silica gel column with 10% MeOH/CH<sub>2</sub>Cl<sub>2</sub> gave **50** (39 mg, 15%) as a yellow solid: mp (Et<sub>2</sub>O/pentane triturate) 172 °C (dec); <sup>1</sup>H NMR [(CD<sub>3</sub>)<sub>2</sub>SO]  $\delta$  8.06 (s, 2 H), 6.40 (br t,  $J$  = 6.0 Hz, 2 H), 4.55-4.44 (m, 2 H), 4.13 (ddd,  $J$  = 12.6, 5.7, 2.5 Hz, 2 H), 4.03 (ddd,  $J$  = 12.4, 11.3, 5.0 Hz, 2 H), 3.43 (ddd,  $J$  = 14.4, 5.9, 4.9 Hz, 2 H), 3.37 (ddd,  $J$  = 14.5, 8.6, 6.1 Hz, 2 H), 2.23-2.11 (m, 2 H), 2.02-1.87 (m, 2 H); HRESIMS calcd for C<sub>15</sub>H<sub>18</sub>N<sub>8</sub>NaO<sub>7</sub>  $m/z$  [M + Na]<sup>+</sup> 445.1191, found 445.1182.

**1-[(7-Methyl-2-nitro-6,7-dihydro-5H-imidazo[2,1-b][1,3]oxazin-7-yl)methyl]-3-[4-(trifluoromethoxy)phenyl]urea (51) and 1,3-bis[(7-methyl-2-nitro-6,7-dihydro-5H-imidazo[2,1-b][1,3]oxazin-7-yl)methyl]urea (52).** Reaction of azide **37** (180 mg, 0.756 mmol) with 4-(trifluoromethoxy)aniline (135  $\mu$ L, 1.01 mmol), triphenylphosphine (350 mg, 1.33 mmol) and triethylammonium bicarbonate (1 mL of  $\sim$ 2 M,  $\sim$ 2.0 mmol), using General Procedure D, gave (via chromatography on silica gel, eluting with 1.5% MeOH/CH<sub>2</sub>Cl<sub>2</sub>) **51** (45 mg, 14%) as a pale yellow solid: mp (Et<sub>2</sub>O/pentane) 161-163 °C; <sup>1</sup>H NMR [(CD<sub>3</sub>)<sub>2</sub>SO]  $\delta$  8.78 (br s, 1 H), 8.08 (s, 1 H), 7.48 (br d,  $J$  = 9.1 Hz, 2 H), 7.23 (br d,  $J$  = 8.3 Hz, 2 H), 6.55 (br t,  $J$  = 6.2 Hz, 1 H), 4.19 (dt,  $J$  = 13.0, 5.4 Hz, 1 H), 4.07 (ddd,  $J$  = 13.1, 9.1, 5.6 Hz, 1 H), 3.45 (d,  $J$  = 6.2 Hz, 2 H), 2.14 (ddd,  $J$  = 14.5, 9.0, 5.9 Hz, 1 H), 2.05 (dt,  $J$  = 14.5, 5.3 Hz, 1 H), 1.36 (s, 3 H); <sup>13</sup>C NMR [(CD<sub>3</sub>)<sub>2</sub>SO]  $\delta$  155.2, 147.2, 142.2, 142.1 (q,  $J_{C-F}$  = 1.6 Hz), 139.5, 121.7 (2 C), 120.2 (q,  $J_{C-F}$  = 255.3 Hz), 118.7 (2 C), 117.7, 82.0, 46.1, 39.5, 27.2, 21.5. Anal. (C<sub>16</sub>H<sub>16</sub>F<sub>3</sub>N<sub>5</sub>O<sub>5</sub>) C, H, N (see Table S4).

Further elution of the silica gel column with 10% MeOH/CH<sub>2</sub>Cl<sub>2</sub> gave **52** (57 mg, 17%) as a light yellow solid: mp (MeOH/CH<sub>2</sub>Cl<sub>2</sub>/hexane) 217 °C (dec); <sup>1</sup>H NMR [(CD<sub>3</sub>)<sub>2</sub>SO]  $\delta$  8.06 (s, 2 H), 6.36 (br t,  $J$  = 6.2 Hz, 2 H), 4.17 (dt,  $J$  = 13.0, 5.5 Hz, 2 H), 4.05 (ddd,  $J$  = 13.1, 8.9, 5.6 Hz, 2 H), 3.36 (br d,  $J$  = 6.3 Hz, 4 H), 2.09 (ddd,  $J$  = 14.4, 8.8, 5.9 Hz, 2 H), 2.00 (dt,  $J$  = 14.4, 5.3 Hz, 2 H), 1.31 (s, 6 H); HRESIMS calcd for C<sub>17</sub>H<sub>22</sub>N<sub>8</sub>NaO<sub>7</sub>  $m/z$  [M + Na]<sup>+</sup> 473.1504, found 473.1488.

**1-[(7-Methyl-2-nitro-6,7-dihydro-5H-imidazo[2,1-b][1,3]oxazin-7-yl)methyl]-3-[4-(trifluoromethoxy)benzyl]urea (53).** 1-(Isocyanatomethyl)-4-(trifluoromethoxy)benzene<sup>S8</sup> (0.11 mL, 0.66 mmol) and dibutyltin diacetate (9.3 mg, 0.026 mmol) were successively added to a stirred solution of amine **38** (40.0 mg, 0.188 mmol) and DIPEA (0.10 mL, 0.574 mmol) in anhydrous DMF (2 mL) under N<sub>2</sub>. The mixture was stirred at 20 °C for 16 h and then treated with ice-water (5 mL), added to brine (40 mL), and extracted with CH<sub>2</sub>Cl<sub>2</sub> (5 x 50 mL). The combined extracts were evaporated to dryness under reduced pressure (at 30 °C) and the residue was chromatographed on silica gel. Elution with 0-1% MeOH/CH<sub>2</sub>Cl<sub>2</sub> first

gave foreruns, and then further elution with 1-1.5% MeOH/CH<sub>2</sub>Cl<sub>2</sub> gave **53** (75 mg, 93%) as a light yellow solid: mp (Et<sub>2</sub>O/pentane triturate) 111-114 °C (dec); <sup>1</sup>H NMR (CDCl<sub>3</sub>) δ 7.43 (s, 1 H), 7.34 (br d, *J* = 8.7 Hz, 2 H), 7.12 (br d, *J* = 7.9 Hz, 2 H), 6.36 (br t, *J* = 5.8 Hz, 1 H), 6.11 (br dd, *J* = 6.6, 5.8 Hz, 1 H), 4.44 (dd, *J* = 15.2, 6.4 Hz, 1 H), 4.38 (dd, *J* = 15.3, 6.1 Hz, 1 H), 4.15 (ddd, *J* = 12.7, 6.2, 3.9 Hz, 1 H), 4.03 (ddd, *J* = 12.7, 10.5, 5.4 Hz, 1 H), 3.85 (dd, *J* = 14.8, 7.7 Hz, 1 H), 3.36 (dd, *J* = 14.9, 5.3 Hz, 1 H), 2.40 (ddd, *J* = 14.7, 10.5, 6.3 Hz, 1 H), 2.09 (ddd, *J* = 14.7, 5.3, 3.9 Hz, 1 H), 1.43 (s, 3 H); HRESIMS calcd for C<sub>17</sub>H<sub>19</sub>F<sub>3</sub>N<sub>5</sub>O<sub>5</sub> *m/z* [M + H]<sup>+</sup> 430.1333, found 430.1336; HPLC purity: 97.2%.

#### *Synthesis of N-carbamate 55 (Scheme 2D)*

**4-Nitrophenyl [4-(trifluoromethoxy)benzyl] carbonate (54).** 4-(Trifluoromethoxy)benzyl alcohol (0.25 mL, 1.73 mmol) was added to a solution of 4-nitrophenyl chloroformate (354 mg, 1.76 mmol) in anhydrous CH<sub>2</sub>Cl<sub>2</sub> (8 mL) under N<sub>2</sub>. The mixture was cooled to 0 °C and a solution of anhydrous pyridine (0.15 mL, 1.85 mmol) in anhydrous CH<sub>2</sub>Cl<sub>2</sub> (1.5 mL) was added dropwise, with stirring. The resulting mixture was stirred at 0-20 °C for 20 h and then concentrated under reduced pressure. The residue was dissolved in EtOAc (15 mL) and washed successively with 10% citric acid (2 x 6 mL), water (15 mL), saturated aq NaHCO<sub>3</sub> (2 x 10 mL), and brine (10 mL). The organic phase was evaporated to dryness under reduced pressure (at 25 °C), and then the residue was diluted with benzene (20 mL) and again evaporated to dryness under reduced pressure, to give crude **54** (605 mg, 98%) as a pale yellow solid, which was used directly; <sup>1</sup>H NMR (CDCl<sub>3</sub>) δ 8.28 (br d, *J* = 9.3 Hz, 2 H), 7.49 (br d, *J* = 8.7 Hz, 2 H), 7.39 (br d, *J* = 9.2 Hz, 2 H), 7.27 (br d, *J* = 7.9 Hz, 2 H), 5.30 (s, 2 H).

**4-(Trifluoromethoxy)benzyl [(7-methyl-2-nitro-6,7-dihydro-5H-imidazo[2,1-*b*][1,3]oxazin-7-yl)methyl]carbamate (55).** Carbonate **54** (93.5 mg crude, <0.262 mmol) was added to a mixture of amine **38** (35.2 mg, 0.166 mmol), DIPEA (30 μL, 0.172 mmol), and DMAP (7.3 mg, 0.060 mmol) in anhydrous DMF (1 mL) under N<sub>2</sub>. The mixture was quickly degassed and resealed under N<sub>2</sub> and stirred at 20 °C for 44 h, then treated with ice/aq NaHCO<sub>3</sub> (10 mL), added to brine (40 mL), and extracted with CH<sub>2</sub>Cl<sub>2</sub> (5 x 50 mL). The combined extracts were evaporated to dryness under reduced pressure (at 30 °C) and the residue was chromatographed on silica gel. Elution with 25-60% EtOAc/petroleum ether first gave foreruns, and then further elution with 60-75% EtOAc/petroleum ether gave **55** (51 mg, 71%) as a pale yellow solid: mp (CH<sub>2</sub>Cl<sub>2</sub>/pentane) 100-103 °C; <sup>1</sup>H NMR [(CD<sub>3</sub>)<sub>2</sub>SO] δ 8.06 (s, 1 H), 7.71 (br t, *J* = 6.4 Hz, 1 H), 7.49 (br d, *J* = 8.7 Hz, 2 H), 7.37 (br d, *J* = 8.1 Hz, 2 H), 5.09 (d, *J* = 13.0 Hz, 1 H), 5.06 (d, *J* = 13.0 Hz, 1 H), 4.15 (dt, *J* = 13.0, 5.5 Hz, 1 H), 4.04 (ddd, *J* = 13.1, 8.7, 5.6 Hz, 1 H), 3.38-3.27 (m, 2 H), 2.11 (ddd, *J* = 14.5, 8.5, 6.0 Hz, 1 H), 2.02 (dt, *J* = 14.4, 5.4 Hz, 1 H), 1.32 (s, 3 H); <sup>13</sup>C NMR [(CD<sub>3</sub>)<sub>2</sub>SO] δ 156.6, 147.8, 147.2, 142.2, 136.6, 129.6 (2 C), 121.0 (2 C), 120.0 (q, *J*<sub>C-F</sub> = 255.0 Hz), 117.7, 81.4, 64.6, 47.5, 39.4, 27.2, 21.8; HRESIMS calcd for C<sub>17</sub>H<sub>18</sub>F<sub>3</sub>N<sub>4</sub>O<sub>6</sub> *m/z* [M + H]<sup>+</sup> 431.1173, found 431.1163; HPLC purity: 98.9%.

#### *Syntheses of sulfonamides 57 and 58 (Scheme 2E)*

**tert-Butyl [(7-methyl-2-nitro-6,7-dihydro-5H-imidazo[2,1-*b*][1,3]oxazin-7-yl)methyl]carbamate (56).** A solution of triphenylphosphine (262 mg, 0.999 mmol) in anhydrous CH<sub>2</sub>Cl<sub>2</sub> (2 x 0.75 mL) was added dropwise to a stirred mixture of azide **37** (201 mg, 0.844 mmol) and Boc-ON (246 mg, 0.999 mmol) in anhydrous CH<sub>2</sub>Cl<sub>2</sub> (4 mL) under N<sub>2</sub> at 0 °C. The mixture was stirred at 20 °C for 24 h, then added to ice/aq NaHCO<sub>3</sub> (50 mL), and extracted with 10% MeOH/CH<sub>2</sub>Cl<sub>2</sub> (50 mL) and CH<sub>2</sub>Cl<sub>2</sub> (3 x 50 mL). The combined

extracts were evaporated to dryness under reduced pressure (at 30 °C) and the residue was chromatographed on silica gel. Elution with CH<sub>2</sub>Cl<sub>2</sub> first gave foreruns and then further elution with 2% MeOH/CH<sub>2</sub>Cl<sub>2</sub> gave a mixture (0.48 g), which was dried onto silica gel and chromatographed again on silica gel. Elution with 20-40% EtOAc/petroleum ether gave foreruns, and then further elution with 45% EtOAc/petroleum ether first gave a product-containing mixture (28 mg). Further elution with 45-50% EtOAc/petroleum ether gave **56** (53 mg, 20%) as a cream solid: mp (MeOH/CH<sub>2</sub>Cl<sub>2</sub>/hexane) 217-219 °C; <sup>1</sup>H NMR [(CD<sub>3</sub>)<sub>2</sub>SO] δ 8.06 (s, 1 H), 7.20 (br t, *J* = 6.3 Hz, 1 H), 4.15 (dt, *J* = 13.1, 5.6 Hz, 1 H), 4.03 (ddd, *J* = 13.1, 8.3, 5.8 Hz, 1 H), 3.23 (d, *J* = 6.4 Hz, 2 H), 2.15-1.94 (m, 2 H), 1.39 (s, 9 H), 1.30 (s, 3 H); HRESIMS calcd for C<sub>13</sub>H<sub>21</sub>N<sub>4</sub>O<sub>5</sub> *m/z* [M + H]<sup>+</sup> 313.1506, found 313.1499.

Further elution of the above column with 55% EtOAc/petroleum ether and EtOAc gave a product-containing mixture (142 mg). Repeat chromatography of the mixed fractions and fractional crystallization (MeOH/CH<sub>2</sub>Cl<sub>2</sub>/pentane) gave additional **56** (123 mg, 47%).

***N*-[(7-Methyl-2-nitro-6,7-dihydro-5*H*-imidazo[2,1-*b*][1,3]oxazin-7-yl)methyl]-4-(trifluoromethoxy)benzene-1-sulfonamide (57)**. Deprotection of Boc derivative **56** (58 mg, 0.186 mmol) with 1:1 TFA/CH<sub>2</sub>Cl<sub>2</sub> and then reaction of the chromatographed crude amine **38** with 4-(trifluoromethoxy)benzenesulfonyl chloride (0.10 mL, 0.589 mmol) and DIPEA (0.17 mL, 0.976 mmol), using General Procedure E, gave **57** (54 mg, 67%) as a cream solid: mp (MeOH/CH<sub>2</sub>Cl<sub>2</sub>/hexane) 200-201 °C; <sup>1</sup>H NMR [(CD<sub>3</sub>)<sub>2</sub>SO] δ 8.24 (br s, 1 H), 8.05 (s, 1 H), 7.96 (br d, *J* = 8.9 Hz, 2 H), 7.59 (br d, *J* = 8.9 Hz, 2 H), 4.14 (dt, *J* = 13.0, 5.6 Hz, 1 H), 4.05 (ddd, *J* = 13.1, 9.0, 5.4 Hz, 1 H), 3.13 (d, *J* = 14.0 Hz, 1 H), 3.06 (d, *J* = 14.0 Hz, 1 H), 2.20 (ddd, *J* = 14.5, 8.9, 6.0 Hz, 1 H), 2.02 (dt, *J* = 14.4, 5.3 Hz, 1 H), 1.34 (s, 3 H); <sup>13</sup>C NMR [(CD<sub>3</sub>)<sub>2</sub>SO] δ 150.8 (q, *J*<sub>C-F</sub> = 1.6 Hz), 147.0, 142.2, 139.7, 129.1 (2 C), 121.5 (2 C), 119.9 (q, *J*<sub>C-F</sub> = 257.4 Hz), 117.7, 80.9, 49.4, 39.3, 27.0, 21.7; HRESIMS calcd for C<sub>15</sub>H<sub>16</sub>F<sub>3</sub>N<sub>4</sub>O<sub>6</sub>S *m/z* [M + H]<sup>+</sup> 437.0737, found 437.0736; HPLC purity: 99.9%.

***N*-[(7-Methyl-2-nitro-6,7-dihydro-5*H*-imidazo[2,1-*b*][1,3]oxazin-7-yl)methyl]-3-(trifluoromethoxy)benzene-1-sulfonamide (58)**. Deprotection of Boc derivative **56** (57.4 mg, 0.184 mmol) with 1:1 TFA/CH<sub>2</sub>Cl<sub>2</sub> and then reaction of the chromatographed crude amine **38** with 3-(trifluoromethoxy)benzenesulfonyl chloride (0.10 mL, 0.587 mmol) and DIPEA (0.17 mL, 0.976 mmol), using General Procedure E, gave **58** (65 mg, 81%) as a pale yellow solid: mp (MeOH/CH<sub>2</sub>Cl<sub>2</sub>/pentane) 162-163 °C; <sup>1</sup>H NMR [(CD<sub>3</sub>)<sub>2</sub>SO] δ 8.32 (br s, 1 H), 8.06 (s, 1 H), 7.87 (br d, *J* = 7.8 Hz, 1 H), 7.77 (br s, 1 H), 7.75 (t, *J* = 8.0 Hz, 1 H), 7.68 (br d, *J* = 8.2 Hz, 1 H), 4.14 (dt, *J* = 13.0, 5.5 Hz, 1 H), 4.05 (ddd, *J* = 13.1, 9.1, 5.5 Hz, 1 H), 3.14 (d, *J* = 14.0 Hz, 1 H), 3.08 (d, *J* = 14.0 Hz, 1 H), 2.19 (ddd, *J* = 14.4, 9.0, 6.0 Hz, 1 H), 2.02 (dt, *J* = 14.4, 5.3 Hz, 1 H), 1.34 (s, 3 H); HRESIMS calcd for C<sub>15</sub>H<sub>16</sub>F<sub>3</sub>N<sub>4</sub>O<sub>6</sub>S *m/z* [M + H]<sup>+</sup> 437.0737, found 437.0740; HPLC purity: 99.9%.

### ***Synthesis of ether-linked amide 64 (Scheme 3A)***

**2-Iodo-*N*-[4-(trifluoromethoxy)phenyl]acetamide (62)**. A mixture of 2-chloro-*N*-[4-(trifluoromethoxy)phenyl]acetamide (**61**) (801 mg, 3.16 mmol) and sodium iodide (5.00 g, 33.4 mmol) in acetone (20 mL) under N<sub>2</sub> was stirred at 56 °C for 2 h and then at 20 °C for 15 h. The resulting mixture was evaporated to dryness under reduced pressure (at 30 °C) and the residue was chromatographed on silica gel. Elution with CH<sub>2</sub>Cl<sub>2</sub> first gave foreruns and then **62**<sup>S9</sup> (1.05 g, 96%) as a white solid: mp (CH<sub>2</sub>Cl<sub>2</sub>/hexane) 140-142 °C (lit.<sup>S9</sup> mp 140 °C); <sup>1</sup>H NMR (CDCl<sub>3</sub>) δ 7.66 (br s, 1 H), 7.54 (br d, *J* = 9.0 Hz, 2 H), 7.21 (br d, *J* = 8.5 Hz, 2 H), 3.86 (s, 2 H); HRESIMS calcd for C<sub>9</sub>H<sub>8</sub>F<sub>3</sub>INO<sub>2</sub> *m/z* [M + H]<sup>+</sup> 345.9546, found 345.9548.

**2-[(7-Methyl-2-nitro-6,7-dihydro-5H-imidazo[2,1-*b*][1,3]oxazin-7-yl)methoxy]-*N*-[4-(trifluoromethoxy)phenyl]acetamide (64).** Sodium hydride (60% in mineral oil, 70 mg, 1.75 mmol) was added to a mixture of 7-methyl-2-nitro-6,7-dihydro-5H-imidazo[2,1-*b*][1,3]oxazin-7-yl)methanol<sup>S1</sup> (**63**) (150 mg, 0.704 mmol) and iodide **62** (320 mg, 0.927 mmol) in anhydrous DMF (3 mL) under N<sub>2</sub> at 0 °C. The mixture was immediately degassed and resealed under N<sub>2</sub>, and then stirred at 20 °C for 80 min. The resulting mixture was rapidly cooled (CO<sub>2</sub>/acetone), quenched with ice/aqueous NaHCO<sub>3</sub> (10 mL), added to brine (40 mL), and extracted with 10% MeOH/CH<sub>2</sub>Cl<sub>2</sub> (2 x 50 mL) and CH<sub>2</sub>Cl<sub>2</sub> (6 x 50 mL). The combined extracts were evaporated to dryness under reduced pressure (at 30 °C) and the residue was chromatographed on silica gel. Elution with 0-0.5% MeOH/CH<sub>2</sub>Cl<sub>2</sub> first gave foreruns, and then further elution with 0.75% MeOH/CH<sub>2</sub>Cl<sub>2</sub> gave the crude product, which was further purified by chromatography on silica gel. Elution with 75% EtOAc/petroleum ether first gave foreruns, and then further elution with EtOAc gave **64** (13 mg, 4%) as a cream solid: mp (CH<sub>2</sub>Cl<sub>2</sub>/pentane) 122-124 °C; <sup>1</sup>H NMR [(CD<sub>3</sub>)<sub>2</sub>SO] δ 9.91 (br s, 1 H), 8.08 (s, 1 H), 7.73 (br d, *J* = 9.1 Hz, 2 H), 7.32 (br d, *J* = 8.3 Hz, 2 H), 4.20 (d, *J* = 15.3 Hz, 1 H), 4.19 (dt, *J* = 12.8, 5.9 Hz, 1 H), 4.15 (d, *J* = 15.3 Hz, 1 H), 4.09 (ddd, *J* = 13.0, 8.1, 5.6 Hz, 1 H), 3.74 (d, *J* = 10.7 Hz, 1 H), 3.70 (d, *J* = 10.7 Hz, 1 H), 2.34 (ddd, *J* = 14.5, 8.0, 5.8 Hz, 1 H), 2.09 (dt, *J* = 14.4, 5.8 Hz, 1 H), 1.41 (s, 3 H); <sup>13</sup>C NMR [(CD<sub>3</sub>)<sub>2</sub>SO] δ 168.1, 147.4, 143.7 (q, *J*<sub>C-F</sub> = 1.5 Hz), 142.2, 137.6, 121.5 (2 C), 121.0 (2 C), 120.1 (q, *J*<sub>C-F</sub> = 255.6 Hz), 117.7, 81.2, 75.3, 70.5, 39.6, 26.9, 21.5; HRESIMS calcd for C<sub>17</sub>H<sub>18</sub>F<sub>3</sub>N<sub>4</sub>O<sub>6</sub> *m/z* [M + H]<sup>+</sup> 431.1173, found 431.1174; HPLC purity: 99.5%.

#### Syntheses of *O*-carbamates **65**, **66**, and **68-74** (Scheme 3B)

**(2-Nitro-6,7-dihydro-5H-imidazo[2,1-*b*][1,3]oxazin-7-yl)methyl [4-(trifluoromethoxy)phenyl]carbamate (65).** Reaction of alcohol **41**<sup>S1</sup> (80.3 mg, 0.403 mmol), 1-isocyanato-4-(trifluoromethoxy)benzene (95 μL, 0.630 mmol), and copper(I) chloride (6.5 mg, 0.066 mmol), using General Procedure F, gave **65** (159 mg, 98%) as a cream solid: mp (MeOH/CH<sub>2</sub>Cl<sub>2</sub>/hexane) 156-158 °C; <sup>1</sup>H NMR [(CD<sub>3</sub>)<sub>2</sub>SO] δ 10.07 (br s, 1 H), 8.08 (s, 1 H), 7.57 (br d, *J* = 9.1 Hz, 2 H), 7.31 (br d, *J* = 8.5 Hz, 2 H), 4.87-4.78 (m, 1 H), 4.45 (dd, *J* = 12.3, 2.9 Hz, 1 H), 4.37 (dd, *J* = 12.3, 6.2 Hz, 1 H), 4.17 (ddd, *J* = 12.5, 5.7, 2.5 Hz, 1 H), 4.08 (ddd, *J* = 12.4, 11.4, 5.0 Hz, 1 H), 2.32-2.21 (m, 1 H), 2.18-2.04 (m, 1 H); <sup>13</sup>C NMR [(CD<sub>3</sub>)<sub>2</sub>SO] δ 153.1, 147.7, 143.2 (q, *J*<sub>C-F</sub> = 1.8 Hz), 142.1, 138.2, 121.8 (2 C), 120.1 (q, *J*<sub>C-F</sub> = 255.5 Hz), 119.5 (2 C), 117.8, 75.9, 64.9, 41.6, 22.3. Anal. (C<sub>15</sub>H<sub>13</sub>F<sub>3</sub>N<sub>4</sub>O<sub>6</sub>) C, H, N (see Table S4).

**(7-Methyl-2-nitro-6,7-dihydro-5H-imidazo[2,1-*b*][1,3]oxazin-7-yl)methyl [4-(trifluoromethoxy)phenyl]carbamate (66).** Reaction of alcohol **63**<sup>S1</sup> (100 mg, 0.469 mmol), 1-isocyanato-4-(trifluoromethoxy)benzene (110 μL, 0.729 mmol), and copper(I) chloride (8.0 mg, 0.081 mmol), using General Procedure F for 32 h, gave **66** (192 mg, 98%) as a cream solid: mp (CH<sub>2</sub>Cl<sub>2</sub>/pentane) 97-100 °C; <sup>1</sup>H NMR [(CD<sub>3</sub>)<sub>2</sub>SO] δ 10.03 (br s, 1 H), 8.08 (s, 1 H), 7.56 (br d, *J* = 9.0 Hz, 2 H), 7.30 (br d, *J* = 8.4 Hz, 2 H), 4.32 (s, 2 H), 4.19 (dt, *J* = 13.1, 5.5 Hz, 1 H), 4.12 (ddd, *J* = 13.1, 9.1, 5.5 Hz, 1 H), 2.27 (ddd, *J* = 14.4, 9.0, 6.0 Hz, 1 H), 2.14 (dt, *J* = 14.3, 5.2 Hz, 1 H), 1.44 (s, 3 H); <sup>13</sup>C NMR [(CD<sub>3</sub>)<sub>2</sub>SO] δ 153.0, 147.0, 143.2, 142.2, 138.1, 121.7 (2 C), 120.1 (q, *J*<sub>C-F</sub> = 255.3 Hz), 119.5 (2 C), 117.8, 80.4, 67.7, 39.3, 26.6, 20.7. Anal. (C<sub>16</sub>H<sub>15</sub>F<sub>3</sub>N<sub>4</sub>O<sub>6</sub>) C, H, N (see Table S4).

**[(7*R*)-7-Methyl-2-nitro-6,7-dihydro-5H-imidazo[2,1-*b*][1,3]oxazin-7-yl]methyl [4-(trifluoromethoxy)phenyl]carbamate (68).** Reaction of [(7*R*)-7-methyl-2-nitro-6,7-dihydro-5H-imidazo[2,1-*b*][1,3]oxazin-7-yl]methanol<sup>S2</sup> (**67**) (220 mg, 1.03 mmol), 1-isocyanato-4-



(trifluoromethoxy)benzene (260  $\mu$ L, 1.72 mmol), and copper(I) chloride (19 mg, 0.19 mmol), using General Procedure F for 43 h, gave **68** (420 mg, 98%) as a cream solid: mp (CH<sub>2</sub>Cl<sub>2</sub>/pentane) 140-142 °C; <sup>1</sup>H NMR [(CD<sub>3</sub>)<sub>2</sub>SO]  $\delta$  10.03 (br s, 1 H), 8.09 (s, 1 H), 7.56 (br d,  $J$  = 9.0 Hz, 2 H), 7.31 (br d,  $J$  = 8.4 Hz, 2 H), 4.32 (s, 2 H), 4.19 (dt,  $J$  = 13.1, 5.5 Hz, 1 H), 4.12 (ddd,  $J$  = 13.1, 9.2, 5.5 Hz, 1 H), 2.27 (ddd,  $J$  = 14.5, 8.9, 6.0 Hz, 1 H), 2.14 (dt,  $J$  = 14.4, 5.2 Hz, 1 H), 1.44 (s, 3 H); <sup>13</sup>C NMR [(CD<sub>3</sub>)<sub>2</sub>SO]  $\delta$  153.0, 147.0, 143.2 (q,  $J_{C-F}$  = 1.4 Hz), 142.2, 138.1, 121.7 (2 C), 120.1 (q,  $J_{C-F}$  = 255.4 Hz), 119.5 (2 C), 117.8, 80.4, 67.7, 39.3, 26.6, 20.7; [ $\alpha$ ]<sub>D</sub><sup>25</sup> 32.9 ( $c$  2.007, CHCl<sub>3</sub>); Anal. (C<sub>16</sub>H<sub>15</sub>F<sub>3</sub>N<sub>4</sub>O<sub>6</sub>) C, H, N (see Table S4).

**[(7S)-7-Methyl-2-nitro-6,7-dihydro-5H-imidazo[2,1-b][1,3]oxazin-7-yl)methyl [4-(trifluoromethoxy)phenyl]carbamate (69)**. Reaction of [(7S)-7-methyl-2-nitro-6,7-dihydro-5H-imidazo[2,1-b][1,3]oxazin-7-yl)methanol<sup>S2</sup> (*ent*-**67**) (220 mg, 1.03 mmol), 1-isocyanato-4-(trifluoromethoxy)benzene (260  $\mu$ L, 1.72 mmol), and copper(I) chloride (15 mg, 0.15 mmol), using General Procedure F for 42 h, gave **69** (421 mg, 98%) as a cream solid: mp (CH<sub>2</sub>Cl<sub>2</sub>/pentane) 141-143 °C; <sup>1</sup>H NMR [(CD<sub>3</sub>)<sub>2</sub>SO]  $\delta$  10.03 (br s, 1 H), 8.09 (s, 1 H), 7.56 (br d,  $J$  = 9.0 Hz, 2 H), 7.31 (br d,  $J$  = 8.4 Hz, 2 H), 4.32 (s, 2 H), 4.19 (dt,  $J$  = 13.0, 5.5 Hz, 1 H), 4.12 (ddd,  $J$  = 13.1, 9.1, 5.5 Hz, 1 H), 2.27 (ddd,  $J$  = 14.4, 9.0, 5.9 Hz, 1 H), 2.14 (dt,  $J$  = 14.4, 5.2 Hz, 1 H), 1.44 (s, 3 H); <sup>13</sup>C NMR [(CD<sub>3</sub>)<sub>2</sub>SO]  $\delta$  153.0, 147.0, 143.2 (q,  $J_{C-F}$  = 1.5 Hz), 142.2, 138.1, 121.7 (2 C), 120.1 (q,  $J_{C-F}$  = 255.4 Hz), 119.5 (2 C), 117.8, 80.4, 67.7, 39.3, 26.6, 20.7; [ $\alpha$ ]<sub>D</sub><sup>25</sup> -32.4 ( $c$  2.004, CHCl<sub>3</sub>). Anal. (C<sub>16</sub>H<sub>15</sub>F<sub>3</sub>N<sub>4</sub>O<sub>6</sub>·0.5H<sub>2</sub>O) C, H, N (see Table S4). HPLC purity: 99.9%.

**(7-Methyl-2-nitro-6,7-dihydro-5H-imidazo[2,1-b][1,3]oxazin-7-yl)methyl [2-(trifluoromethoxy)phenyl]carbamate (70)**. Reaction of alcohol **63** (100 mg, 0.469 mmol), 1-isocyanato-2-(trifluoromethoxy)benzene (110  $\mu$ L, 0.731 mmol), and copper(I) chloride (5.0 mg, 0.051 mmol), using General Procedure F for 52 h, gave **70** (179 mg, 91%) as a cream solid: mp (CH<sub>2</sub>Cl<sub>2</sub>/pentane) 107-109 °C; <sup>1</sup>H NMR [(CD<sub>3</sub>)<sub>2</sub>SO]  $\delta$  9.56 (br s, 1 H), 8.07 (s, 1 H), 7.68 (br d,  $J$  = 8.0 Hz, 1 H), 7.41-7.32 (m, 2 H), 7.25 (td,  $J$  = 7.8, 1.7 Hz, 1 H), 4.34 (d,  $J$  = 12.0 Hz, 1 H), 4.29 (d,  $J$  = 12.0 Hz, 1 H), 4.18 (dt,  $J$  = 13.1, 5.7 Hz, 1 H), 4.11 (ddd,  $J$  = 13.1, 8.8, 5.5 Hz, 1 H), 2.28 (ddd,  $J$  = 14.5, 8.7, 6.1 Hz, 1 H), 2.12 (dt,  $J$  = 14.3, 5.4 Hz, 1 H), 1.43 (s, 3 H). Anal. (C<sub>16</sub>H<sub>15</sub>F<sub>3</sub>N<sub>4</sub>O<sub>6</sub>) C, H, N (see Table S4).

**(2-Nitro-6,7-dihydro-5H-imidazo[2,1-b][1,3]oxazin-7-yl)methyl [4-(trifluoromethoxy)benzyl]carbamate (71) and (2-nitro-6,7-dihydro-5H-imidazo[2,1-b][1,3]oxazin-7-yl)methyl [4-(trifluoromethoxy)benzyl]{{[4-(trifluoromethoxy)benzyl]carbamoyl}carbamate (73)**. Reaction of alcohol **41** (80.1 mg, 0.402 mmol), 1-(isocyanatomethyl)-4-(trifluoromethoxy)benzene<sup>S8</sup> (160  $\mu$ L, ~0.96 mmol), and copper(I) chloride (7.1 mg, 0.072 mmol), using General Procedure F for 40 h, followed by chromatography of the product mixture on silica gel, eluting with 0-3% EtOAc/CH<sub>2</sub>Cl<sub>2</sub> (foreruns) and then with 4-6% EtOAc/CH<sub>2</sub>Cl<sub>2</sub>, first gave crude **73**, which was chromatographed again on silica gel. Elution with 20-50% EtOAc/petroleum ether gave foreruns, and then further elution with EtOAc gave **73** (131 mg, 51%) as a pale yellow solid: mp (pentane triturate) 77-80 °C; <sup>1</sup>H NMR (CDCl<sub>3</sub>)  $\delta$  8.89 (br t,  $J$  = 5.4 Hz, 1 H), 7.40 (s, 1 H), 7.36 (br d,  $J$  = 8.7 Hz, 2 H), 7.32 (br d,  $J$  = 8.7 Hz, 2 H), 7.20 (br d,  $J$  = 7.9 Hz, 2 H), 7.08 (br d,  $J$  = 7.9 Hz, 2 H), 5.10 (d,  $J$  = 15.5 Hz, 1 H), 4.93 (d,  $J$  = 15.5 Hz, 1 H), 4.54 (d,  $J$  = 5.7 Hz, 2 H), 4.53-4.43 (m, 3 H), 4.02-3.91 (m, 2 H), 1.99-1.90 (m, 1 H), 1.79-1.64 (m, 1 H); HRESIMS calcd for C<sub>25</sub>H<sub>22</sub>F<sub>6</sub>N<sub>5</sub>O<sub>8</sub>  $m/z$  [M + H]<sup>+</sup> 634.1367, found 634.1374; HPLC purity: 98.2%.

Further elution of the first column above with 10% EtOAc/CH<sub>2</sub>Cl<sub>2</sub> gave **71** (74 mg, 44%) as a cream solid: mp (CH<sub>2</sub>Cl<sub>2</sub>/pentane) 94-97 °C; <sup>1</sup>H NMR [(CD<sub>3</sub>)<sub>2</sub>SO]  $\delta$  8.07 (s, 1 H), 7.97 (br t,

$J = 6.1$  Hz, 1 H), 7.38 (br d,  $J = 8.7$  Hz, 2 H), 7.33 (br d,  $J = 8.4$  Hz, 2 H), 4.79-4.70 (m, 1 H), 4.33 (dd,  $J = 12.3, 3.0$  Hz, 1 H), 4.24 (dd,  $J = 12.0, 6.2$  Hz, 1 H), 4.23 (d,  $J = 6.2$  Hz, 2 H), 4.15 (ddd,  $J = 12.4, 5.6, 2.5$  Hz, 1 H), 4.06 (ddd,  $J = 12.3, 11.3, 4.9$  Hz, 1 H), 2.26-2.16 (m, 1 H), 2.13-1.98 (m, 1 H); HRESIMS calcd for  $C_{16}H_{16}F_3N_4O_6$   $m/z$   $[M + H]^+$  417.1016, found 417.1021; HPLC purity: 98.7%.

**(7-Methyl-2-nitro-6,7-dihydro-5H-imidazo[2,1-*b*][1,3]oxazin-7-yl)methyl [4-(trifluoromethoxy)benzyl]carbamate (72) and (7-methyl-2-nitro-6,7-dihydro-5H-imidazo[2,1-*b*][1,3]oxazin-7-yl)methyl [4-(trifluoromethoxy)benzyl]-{[4-(trifluoromethoxy)benzyl]carbamoyl}carbamate (74).** Reaction of alcohol **63** (80.2 mg, 0.376 mmol), 1-(isocyanatomethyl)-4-(trifluoromethoxy)benzene<sup>S8</sup> (160  $\mu$ L, ~0.96 mmol), and copper(I) chloride (8.0 mg, 0.081 mmol), using General Procedure F for 36 h, followed by chromatography of the product mixture on silica gel, eluting with 0-4% EtOAc/ $CH_2Cl_2$  (foreruns) and then with 4-6% EtOAc/ $CH_2Cl_2$ , first gave crude **74**, which was chromatographed again on silica gel. Elution with 20-50% EtOAc/petroleum ether gave foreruns, and then further elution with EtOAc gave **74** (112 mg, 46%) as a pale yellow solid: mp (pentane triturate) 77-80  $^{\circ}C$ ;  $^1H$  NMR ( $CDCl_3$ )  $\delta$  8.90 (br t,  $J = 5.5$  Hz, 1 H), 7.40 (s, 1 H), 7.37 (br d,  $J = 8.7$  Hz, 2 H), 7.30-7.24 (m, 2 H), 7.20 (br d,  $J = 8.7$  Hz, 2 H), 7.06 (br d,  $J = 7.9$  Hz, 2 H), 5.07 (d,  $J = 15.7$  Hz, 1 H), 4.96 (d,  $J = 15.7$  Hz, 1 H), 4.54 (d,  $J = 5.7$  Hz, 2 H), 4.30 (s, 2 H), 3.94 (ddd,  $J = 12.8, 9.9, 5.7$  Hz, 1 H), 3.84 (ddd,  $J = 12.8, 5.9$  Hz, 1 H), 1.74 (ddd,  $J = 14.3, 5.6, 4.1$  Hz, 1 H), 1.67 (ddd,  $J = 14.3, 9.8, 6.1$  Hz, 1 H), 1.29 (s, 3 H); HRESIMS calcd for  $C_{26}H_{24}F_6N_5O_8$   $m/z$   $[M + H]^+$  648.1524, found 648.1538; HPLC purity: 99.9%.

Further elution of the first column above with 8-10% EtOAc/ $CH_2Cl_2$  gave **72** (80 mg, 49%) as a cream solid: mp (Et<sub>2</sub>O/pentane triturate) 76-79  $^{\circ}C$ ;  $^1H$  NMR [ $(CD_3)_2SO$ ]  $\delta$  8.07 (s, 1 H), 7.94 (br t,  $J = 6.2$  Hz, 1 H), 7.36 (br d,  $J = 8.7$  Hz, 2 H), 7.32 (br d,  $J = 8.5$  Hz, 2 H), 4.27-4.03 (m, 6 H), 2.22 (ddd,  $J = 14.5, 8.5, 5.9$  Hz, 1 H), 2.09 (dt,  $J = 14.4, 5.4$  Hz, 1 H), 1.39 (s, 3 H);  $^{13}C$  NMR [ $(CD_3)_2SO$ ]  $\delta$  156.0, 147.1 (2 C), 142.2, 139.1, 128.8 (2 C), 120.9 (2 C), 120.1 (q,  $J_{C-F} = 255.8$  Hz), 117.7, 80.5, 67.6, 43.1, 39.4, 26.7, 20.9; HRESIMS calcd for  $C_{17}H_{18}F_3N_4O_6$   $m/z$   $[M + H]^+$  431.1173, found 431.1176; HPLC purity: 97.3%.

**Minimum Inhibitory Concentration Assays (MABA and LORA).** MIC<sub>90</sub> data against *Mycobacterium tuberculosis* (*M. tb*, strain H37Rv), representing the lowest concentration values to effect at least 90% growth inhibition, were determined using the standard MABA<sup>S10</sup> and LORA<sup>S11</sup> assays, which were conducted at the Institute for Tuberculosis Research (UIC).

**In Vitro Parasite Growth Inhibition and Cytotoxicity Assays.** All test compounds were screened against the intracellular amastigote stages of *L. inf* and *Trypanosoma cruzi*, and the bloodstream form of *Trypanosoma brucei*, as well as for cytotoxicity toward human MRC-5 cells. These assays were carried out at the University of Antwerp in accordance with the published protocols.<sup>S12</sup>

**Solubility Assessments.** The previously reported method was employed.<sup>S2</sup> Briefly, the solid sample was suspended in water or 0.1 M HCl, sonicated for 15 min, and then centrifuged for 6 min; the clear supernatant was diluted with the same solvent (2-fold) and the solubility was quantified by HPLC (comparing against the peak area recorded from a standard solution).

**Microsomal Stability Assays.** These metabolism studies were performed by WuXi AppTec (Shanghai) Co., Ltd., Shanghai, China, in line with the recorded procedure,<sup>S4</sup> in which the compound concentration was 1  $\mu$ M and the incubation time was 1 h.

**In Vivo Experiments.** All animal experiments were conducted according to institutional ethical guidelines for animal care. The LSHTM animal work was performed under a UK Home Office project licence according to the Animal (Scientific Procedures) Act 1986 and the new European Directive 2010/63/EU. The project licence (70/8427) was reviewed by the LSHTM Animal Welfare and Ethical Review Board prior to submission and consequent approval by the UK Home Office.

**Acute VL Infection Model (LSHTM).** The original protocols were followed.<sup>S13</sup> Briefly, groups of five female BALB/c mice were infected with  $2 \times 10^7$  *L. don* amastigotes and, after 7 days, were orally dosed with test compounds (or vehicle alone) once daily for five consecutive days. Parasite load in mouse livers (or spleens) was assessed by microscopic examination of impression smears. Two standard VL drugs, AmBisome and miltefosine (**1**), were also included in each experiment as positive controls.

**Mouse Pharmacokinetics.** Compounds **65** and **66** were evaluated by WuXi AppTec (Shanghai) Co., Ltd. Each compound was administered to two different groups of three female BALB/c mice (4 groups in total of fasted animals); intravenous dosing (at 1 mg/kg) employed a solution vehicle comprising 20% NMP and 40% PEG-400 in water, whereas oral dosing (at 25 mg/kg) used 7% Tween 80 and 3% EtOH in water. Blood samples collected at various time points post-dose (iv: 0.083, 0.25, 1, 2, 4, 7, 12, and 24 h; oral: 0.25, 1, 2, 4, 6, 8, and 24 h) were transferred into prechilled K2-EDTA tubes and kept on ice until being processed for plasma by centrifugation at 4 °C. Plasma samples were stored at -70 °C prior to analysis by LC-MS/MS, and the PK parameters were determined using Phoenix WinNonlin software (version 6.3).

## References for Supporting Information

- (S1) Thompson, A. M.; O'Connor, P. D.; Marshall, A. J.; Yardley, V.; Maes, L.; Gupta, S.; Launay, D.; Braillard, S.; Chatelain, E.; Franzblau, S. G.; Wan, B.; Wang, Y.; Ma, Z.; Cooper, C. B.; Denny, W. A. 7-Substituted 2-nitro-5,6-dihydroimidazo[2,1-*b*][1,3]oxazines: novel antitubercular agents lead to a new preclinical candidate for visceral leishmaniasis. *J. Med. Chem.* **2017**, *60*, 4212-4233.
- (S2) Thompson, A. M.; O'Connor, P. D.; Marshall, A. J.; Yardley, V.; Maes, L.; Gupta, S.; Launay, D.; Braillard, S.; Chatelain, E.; Wan, B.; Franzblau, S. G.; Ma, Z.; Cooper, C. B.; Denny, W. A. Heteroaryl ether analogues of an antileishmanial 7-substituted 2-nitroimidazooxazine lead afford attenuated hERG risk: *In vitro* and *in vivo* appraisal. *Eur. J. Med. Chem.* **2021**, *209*, 112914.
- (S3) Thompson, A. M.; O'Connor, P. D.; Marshall, A. J.; Francisco, A. F.; Kelly, J. M.; Riley, J.; Read, K. D.; Perez, C. J.; Cornwall, S.; Thompson, R. C. A.; Keenan, M.; White, K. L.; Charman, S. A.; Zulfiqar, B.; Sykes, M. L.; Avery, V. M.; Chatelain, E.; Denny, W. A. Re-evaluating pretomanid analogues for Chagas disease: Hit-to-lead studies reveal both *in vitro* and *in vivo* trypanocidal efficacy. *Eur. J. Med. Chem.* **2020**, *207*, 112849.
- (S4) Thompson, A. M.; O'Connor, P. D.; Blaser, A.; Yardley, V.; Maes, L.; Gupta, S.; Launay, D.; Martin, D.; Franzblau, S. G.; Wan, B.; Wang, Y.; Ma, Z.; Denny, W. A. Repositioning antitubercular 6-nitro-2,3-dihydroimidazo[2,1-*b*][1,3]oxazoles for neglected tropical diseases: structure-activity studies on a preclinical candidate for visceral leishmaniasis. *J. Med. Chem.* **2016**, *59*, 2530-2550.
- (S5) Thompson, A. M.; O'Connor, P. D.; Marshall, A. J.; Blaser, A.; Yardley, V.; Maes, L.; Gupta, S.; Launay, D.; Braillard, S.; Chatelain, E.; Wan, B.; Franzblau, S. G.; Ma, Z.; Cooper, C. B.; Denny, W. A. Development of (6*R*)-2-nitro-6-[4-(trifluoromethoxy)phenoxy]-6,7-dihydro-5*H*-imidazo[2,1-*b*][1,3]oxazine (DNDI-8219): a new lead for visceral leishmaniasis. *J. Med. Chem.* **2018**, *61*, 2329-2352.
- (S6) Futatsugi, K.; Bahnck, K. B.; Brenner, M. B.; Buxton, J.; Chin, J. E.; Coffey, S. B.; Dubins, J.; Flynn, D.; Gautreau, D.; Guzman-Perez, A.; Hadcock, J. R.; Hepworth, D.; Herr, M.; Hinchey, T.; Janssen, A. M.; Jennings, S. M.; Jiao, W.; Lavergne, S. Y.; Li, B.; Li, M.; Munchhof, M. J.; Orr, S. T. M.; Piotrowski, D. W.; Roush, N. S.; Sammons, M.; Stevens, B. D.; Storer, G.; Wang, J.; Warmus, J. S.; Wei, L.; Wolford, A. C. Optimization of triazole-based TGR5 agonists towards orally available agents. *Med. Chem. Commun.* **2013**, *4*, 205-210.
- (S7) Bezencon, O.; Heidmann, B.; Siegrist, R.; Stamm, S.; Richard, S.; Pozzi, D.; Corminboeuf, O.; Roch, C.; Kessler, M.; Ertel, E. A.; Reymond, I.; Pfeifer, T.; de Kanter, R.; Toeroek-Schafroth, M.; Moccia, L. G.; Mawet, J.; Moon, R.; Rey, M.; Capeleto, B.; Fournier, E. Discovery of a potent, selective T-type calcium channel blocker as a drug candidate for the treatment of generalized epilepsies. *J. Med. Chem.* **2017**, *60*, 9769-9789.
- (S8) Fletcher, S. R.; Hollingworth, G. J.; Jones, A. B.; Moyes, C. R.; Rogers, L. Preparation of heteroaromatic ureas which modulate the function of the vanilloid-1 receptor (VR1). Patent WO 2005028445 A2, 2005.
- (S9) Fest, C.; Reinecke, P.; Brandes, W.; Haenssler, G. Iodoacetamides. Patent DE 3339351 A1, 1985.
- (S10) Falzari, K.; Zhu, Z.; Pan, D.; Liu, H.; Hongmanee, P.; Franzblau, S. G. *In vitro* and *in vivo* activities of macrolide derivatives against *Mycobacterium tuberculosis*. *Antimicrob. Agents Chemother.* **2005**, *49*, 1447-1454.

- (S11) Cho, S. H.; Warit, S.; Wan, B.; Hwang, C. H.; Pauli, G. F.; Franzblau, S. G. Low-oxygen-recovery assay for high-throughput screening of compounds against nonreplicating *Mycobacterium tuberculosis*. *Antimicrob. Agents Chemother.* **2007**, *51*, 1380-1385.
- (S12) Kaiser, M.; Maes, L.; Tadoori, L. P.; Spangenberg, T.; Ioset, J.-R. Repurposing of the open access malaria box for kinetoplastid diseases identifies novel active scaffolds against trypanosomatids. *J. Biomol. Screening* **2015**, *20*, 634-645.
- (S13) Gupta, S.; Yardley, V.; Vishwakarma, P.; Shivahare, R.; Sharma, B.; Launay, D.; Martin, D.; Puri, S. K. Nitroimidazo-oxazole compound DNDI-VL-2098: an orally effective preclinical drug candidate for the treatment of visceral leishmaniasis. *J. Antimicrob. Chemother.* **2015**, *70*, 518-527.

**Table S4.** Combustion analyses for the new compounds of Table 1 and intermediates.

| No. | Formula                                                                                             | Calculated |      |       | Found |      |       |
|-----|-----------------------------------------------------------------------------------------------------|------------|------|-------|-------|------|-------|
|     |                                                                                                     | C          | H    | N     | C     | H    | N     |
| 15  | C <sub>14</sub> H <sub>13</sub> F <sub>3</sub> N <sub>4</sub> O <sub>4</sub>                        | 46.93      | 3.66 | 15.64 | 46.89 | 3.58 | 15.61 |
| 18  | C <sub>15</sub> H <sub>15</sub> F <sub>3</sub> N <sub>4</sub> O <sub>4</sub>                        | 48.39      | 4.06 | 15.05 | 48.21 | 4.02 | 14.98 |
| 20  | C <sub>14</sub> H <sub>15</sub> ClN <sub>4</sub> O <sub>3</sub>                                     | 52.10      | 4.68 | 17.36 | 52.08 | 4.69 | 17.25 |
| 22  | C <sub>14</sub> H <sub>15</sub> FN <sub>4</sub> O <sub>3</sub>                                      | 54.90      | 4.94 | 18.29 | 54.94 | 4.92 | 18.30 |
| 24  | C <sub>15</sub> H <sub>15</sub> F <sub>3</sub> N <sub>4</sub> O <sub>4</sub>                        | 48.39      | 4.06 | 15.05 | 48.38 | 3.93 | 15.04 |
| 26  | C <sub>16</sub> H <sub>17</sub> F <sub>3</sub> N <sub>4</sub> O <sub>4</sub>                        | 49.74      | 4.44 | 14.50 | 49.80 | 4.40 | 14.57 |
| 28  | C <sub>15</sub> H <sub>17</sub> ClN <sub>4</sub> O <sub>3</sub>                                     | 53.50      | 5.09 | 16.64 | 53.19 | 5.10 | 16.52 |
| 30  | C <sub>15</sub> H <sub>17</sub> FN <sub>4</sub> O <sub>3</sub>                                      | 56.24      | 5.35 | 17.49 | 56.20 | 5.27 | 17.50 |
| 32  | C <sub>7</sub> H <sub>5</sub> F <sub>3</sub> N <sub>2</sub> O                                       | 44.22      | 2.65 | 14.73 | 44.38 | 2.54 | 14.80 |
| 37  | C <sub>8</sub> H <sub>10</sub> N <sub>6</sub> O <sub>3</sub>                                        | 40.34      | 4.23 | 35.28 | 40.54 | 4.26 | 35.46 |
| 42  | C <sub>7</sub> H <sub>8</sub> N <sub>6</sub> O <sub>3</sub>                                         | 37.50      | 3.60 | 37.49 | 37.80 | 3.54 | 37.40 |
| 43  | C <sub>15</sub> H <sub>13</sub> F <sub>3</sub> N <sub>4</sub> O <sub>5</sub> ·0.5H <sub>2</sub> O   | 45.58      | 3.57 | 14.17 | 45.59 | 3.55 | 14.04 |
| 44  | C <sub>16</sub> H <sub>15</sub> F <sub>3</sub> N <sub>4</sub> O <sub>5</sub> ·0.5H <sub>2</sub> O   | 46.95      | 3.94 | 13.69 | 47.00 | 3.95 | 13.58 |
| 45  | C <sub>16</sub> H <sub>15</sub> F <sub>3</sub> N <sub>4</sub> O <sub>5</sub>                        | 48.01      | 3.78 | 14.00 | 47.97 | 3.79 | 13.84 |
| 46  | C <sub>16</sub> H <sub>15</sub> F <sub>3</sub> N <sub>4</sub> O <sub>5</sub> ·0.25Et <sub>2</sub> O | 48.75      | 4.21 | 13.38 | 48.54 | 3.84 | 13.72 |
| 49  | C <sub>15</sub> H <sub>14</sub> F <sub>3</sub> N <sub>5</sub> O <sub>5</sub>                        | 44.90      | 3.52 | 17.45 | 45.06 | 3.68 | 17.18 |
| 51  | C <sub>16</sub> H <sub>16</sub> F <sub>3</sub> N <sub>5</sub> O <sub>5</sub>                        | 46.27      | 3.88 | 16.86 | 46.35 | 3.88 | 16.63 |
| 65  | C <sub>15</sub> H <sub>13</sub> F <sub>3</sub> N <sub>4</sub> O <sub>6</sub>                        | 44.79      | 3.26 | 13.93 | 45.02 | 3.20 | 13.97 |
| 66  | C <sub>16</sub> H <sub>15</sub> F <sub>3</sub> N <sub>4</sub> O <sub>6</sub>                        | 46.16      | 3.63 | 13.46 | 46.44 | 3.65 | 13.37 |
| 68  | C <sub>16</sub> H <sub>15</sub> F <sub>3</sub> N <sub>4</sub> O <sub>6</sub>                        | 46.16      | 3.63 | 13.46 | 45.96 | 3.51 | 13.20 |
| 69  | C <sub>16</sub> H <sub>15</sub> F <sub>3</sub> N <sub>4</sub> O <sub>6</sub> ·0.5H <sub>2</sub> O   | 45.18      | 3.79 | 13.17 | 45.25 | 3.63 | 13.15 |
| 70  | C <sub>16</sub> H <sub>15</sub> F <sub>3</sub> N <sub>4</sub> O <sub>6</sub>                        | 46.16      | 3.63 | 13.46 | 46.20 | 3.64 | 13.48 |

18 (in D<sub>6</sub>-DMSO)

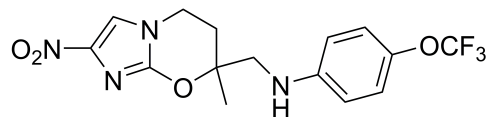

18

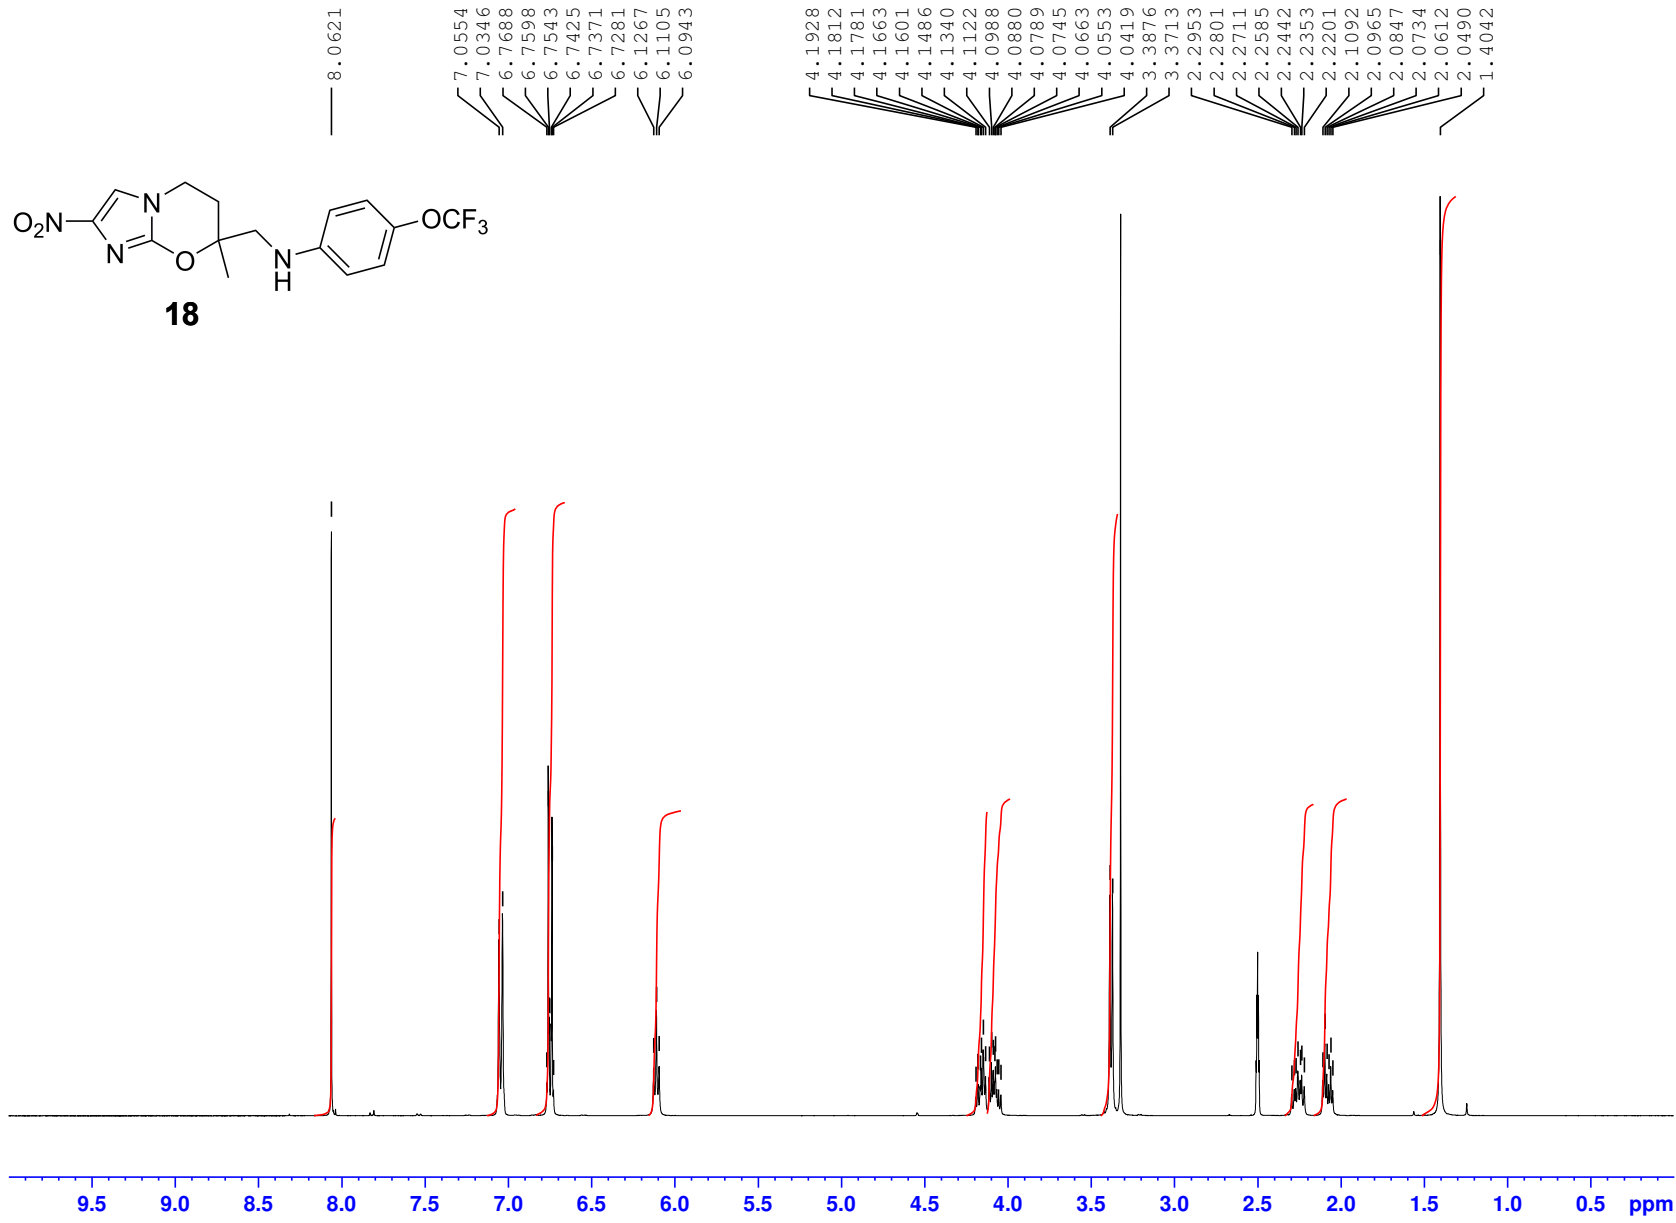

8.0621  
 7.0554  
 7.0346  
 6.7688  
 6.7598  
 6.7543  
 6.7425  
 6.7371  
 6.7281  
 6.1267  
 6.1105  
 6.0943  
 4.1928  
 4.1812  
 4.1781  
 4.1663  
 4.1601  
 4.1486  
 4.1340  
 4.1122  
 4.0988  
 4.0880  
 4.0789  
 4.0745  
 4.0663  
 4.0553  
 4.0419  
 3.3876  
 3.3713  
 2.2953  
 2.2801  
 2.2711  
 2.2585  
 2.2442  
 2.2353  
 2.2201  
 2.1092  
 2.0965  
 2.0847  
 2.0734  
 2.0612  
 2.0490  
 1.4042

Current Data Parameters  
 NAME Aug07-2015-FMHSacsr  
 EXPNO 32  
 PROCNO 1

F2 - Acquisition Parameters  
 Date\_ 20150808  
 Time 1.01 h  
 INSTRUM spect  
 PROBHD 5 mm BBO BB-1H  
 PULPROG zg30  
 TD 65536  
 SOLVENT DMSO  
 NS 64  
 DS 2  
 SWH 8389.262 Hz  
 FIDRES 0.256020 Hz  
 AQ 3.9059455 sec  
 RG 161.3  
 DW 59.600 usec  
 DE 10.00 usec  
 TE 298.0 K  
 D1 2.0000000 sec  
 TD0 1  
 SFO1 400.1334011 MHz  
 NUC1 1H  
 P1 11.00 usec

F2 - Processing parameters  
 SI 32768  
 SF 400.1300024 MHz  
 WDW EM  
 SSB 0  
 LB 0.30 Hz  
 GB 0  
 PC 1.00

1.0000  
 2.0393  
 2.0600  
 1.0246  
 1.0207  
 1.0647  
 2.0217  
 1.0467  
 1.0645  
 3.0882

18 (in D<sub>6</sub>-DMSO)

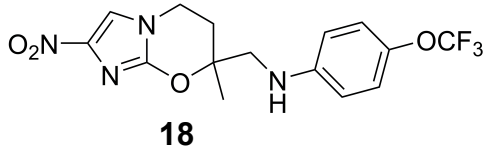

148.2307  
147.3714  
142.2077  
138.4521  
138.4335  
124.1296  
121.9256  
121.6107  
119.0865  
117.6726  
116.5621  
112.5070

82.4590

50.6084

27.2128

21.6198

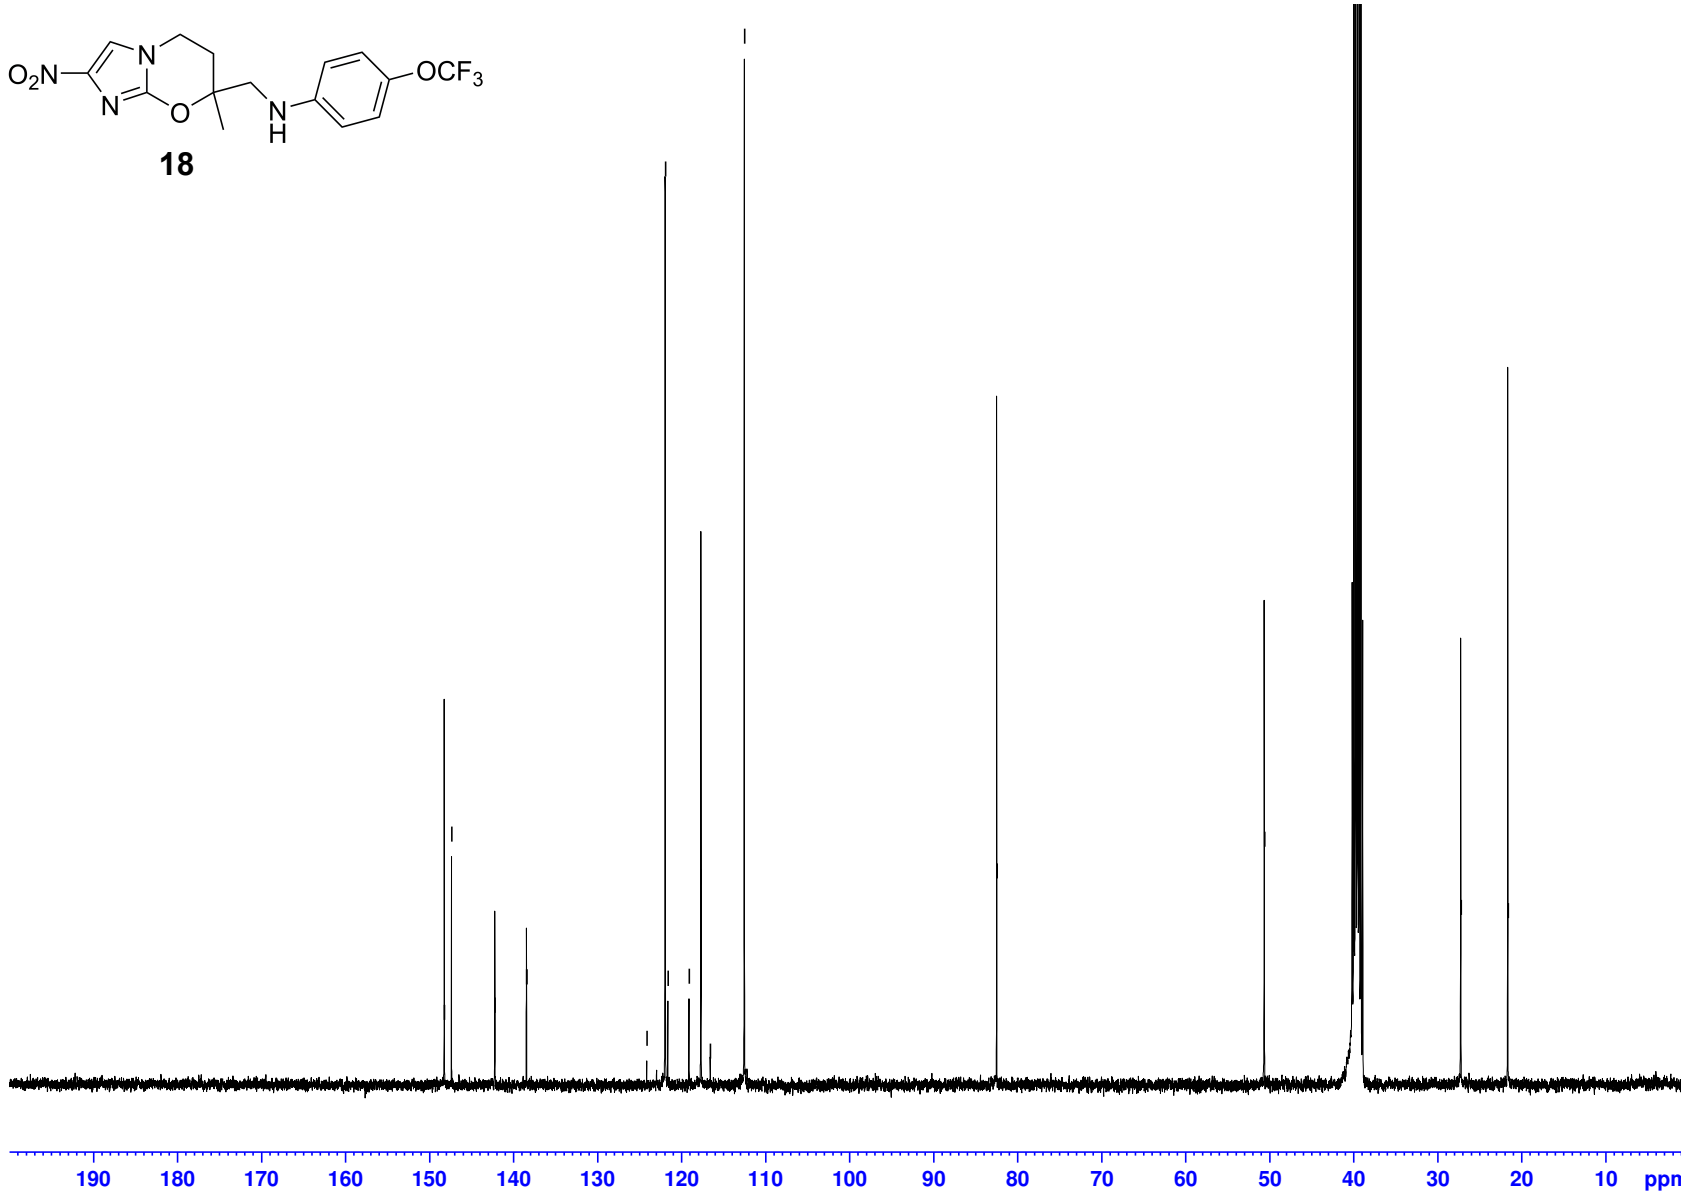

Current Data Parameters  
NAME Aug07-2015-FMH5acsrcnmr  
EXPNO 33  
PROCNO 1

F2 - Acquisition Parameters  
Date\_ 20150808  
Time 6.13 h  
INSTRUM spect  
PROBHD 5 mm BBO BB-1H  
PULPROG zgpg50  
TD 65536  
SOLVENT DMSO  
NS 9000  
DS 4  
SWH 26178.010 Hz  
FIDRES 0.798889 Hz  
AQ 1.2517376 sec  
RG 11585.2  
DW 19.100 usec  
DE 10.00 usec  
TE 298.0 K  
D1 0.75000000 sec  
d11 0.03000000 sec  
DELTA 0.64999998 sec  
TD0 1  
SFO1 100.6248425 MHz  
NUC1 13C  
P1 11.80 usec  
SFO2 400.1316005 MHz  
NUC2 1H  
CPDPRG[2] waltz16  
PCPD2 100.00 usec

F2 - Processing parameters  
SI 32768  
SF 100.6128173 MHz  
WDW EM  
SSB 0  
LB 1.00 Hz  
GB 0  
PC 1.40



26 (in D<sub>6</sub>-DMSO)

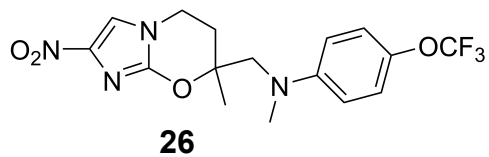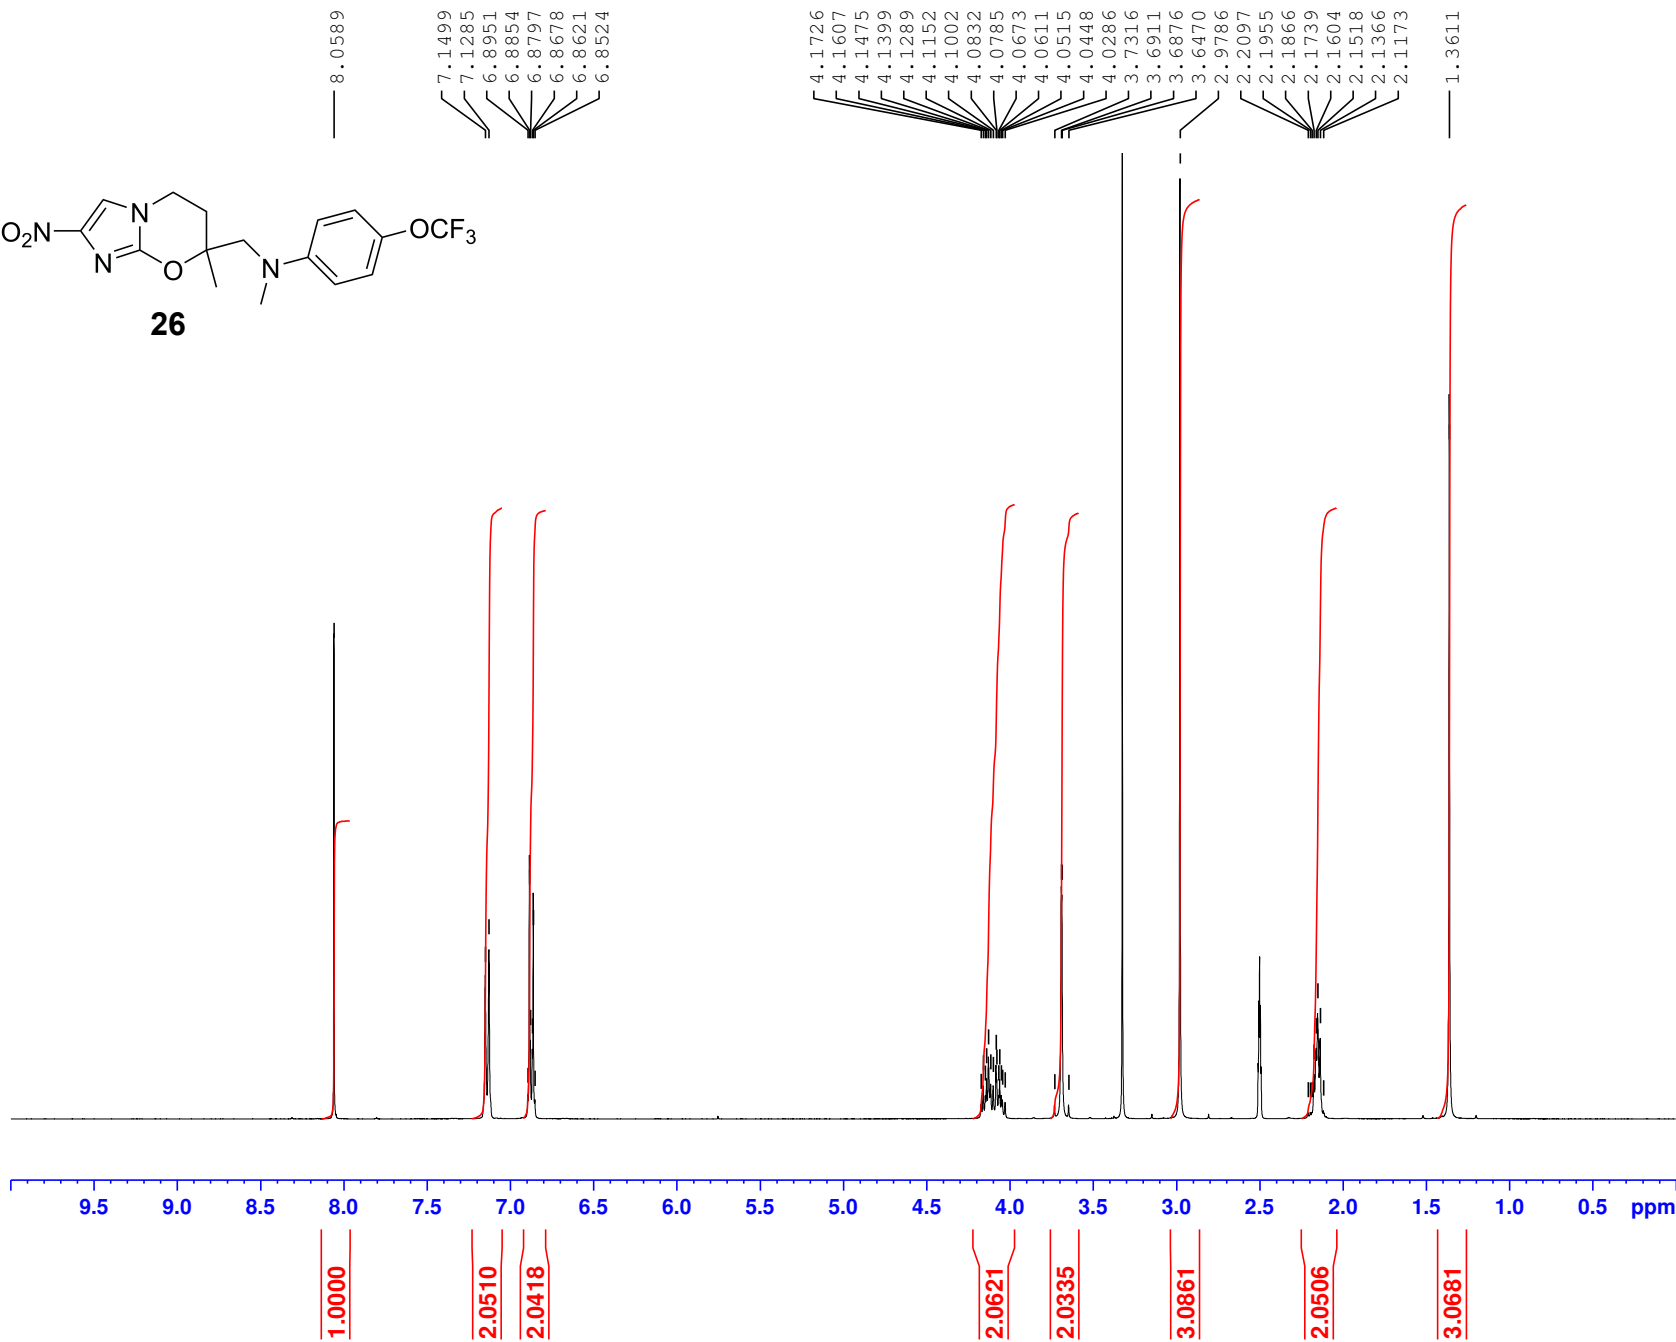

```

Current Data Parameters
NAME          Jan11-2016
EXPNO         16
PROCNO        1

F2 - Acquisition Parameters
Date_         20160111
Time          16.16 h
INSTRUM       spect
PROBHD        Z108618_0860 (
PULPROG       zg30
TD            65536
SOLVENT       DMSO
NS            64
DS            2
SWH           8012.820 Hz
FIDRES        0.122266 Hz
AQ            4.0894465 sec
RG            156.54
DW            62.400 usec
DE            6.50 usec
TE            298.0 K
D1            1.00000000 sec
TD0           1
SFO1          400.1324708 MHz
NUC1          1H
P1            13.60 usec
PLW1          13.19999981 W

F2 - Processing parameters
SI            65536
SF            400.1300027 MHz
WDW           EM
SSB           0
LB            0.30 Hz
GB            0
PC            1.00
    
```

26 (in D<sub>6</sub>-DMSO)

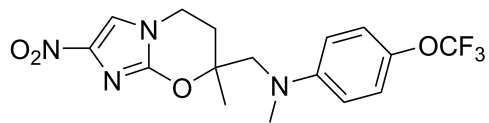

26

148.8735  
147.1548  
142.2254  
138.7224  
138.7046  
124.1277  
121.7545  
121.5999  
119.0753  
117.7399  
116.5464  
112.5438

84.3815

59.1684

40.1995  
39.3883

27.3092

21.1922

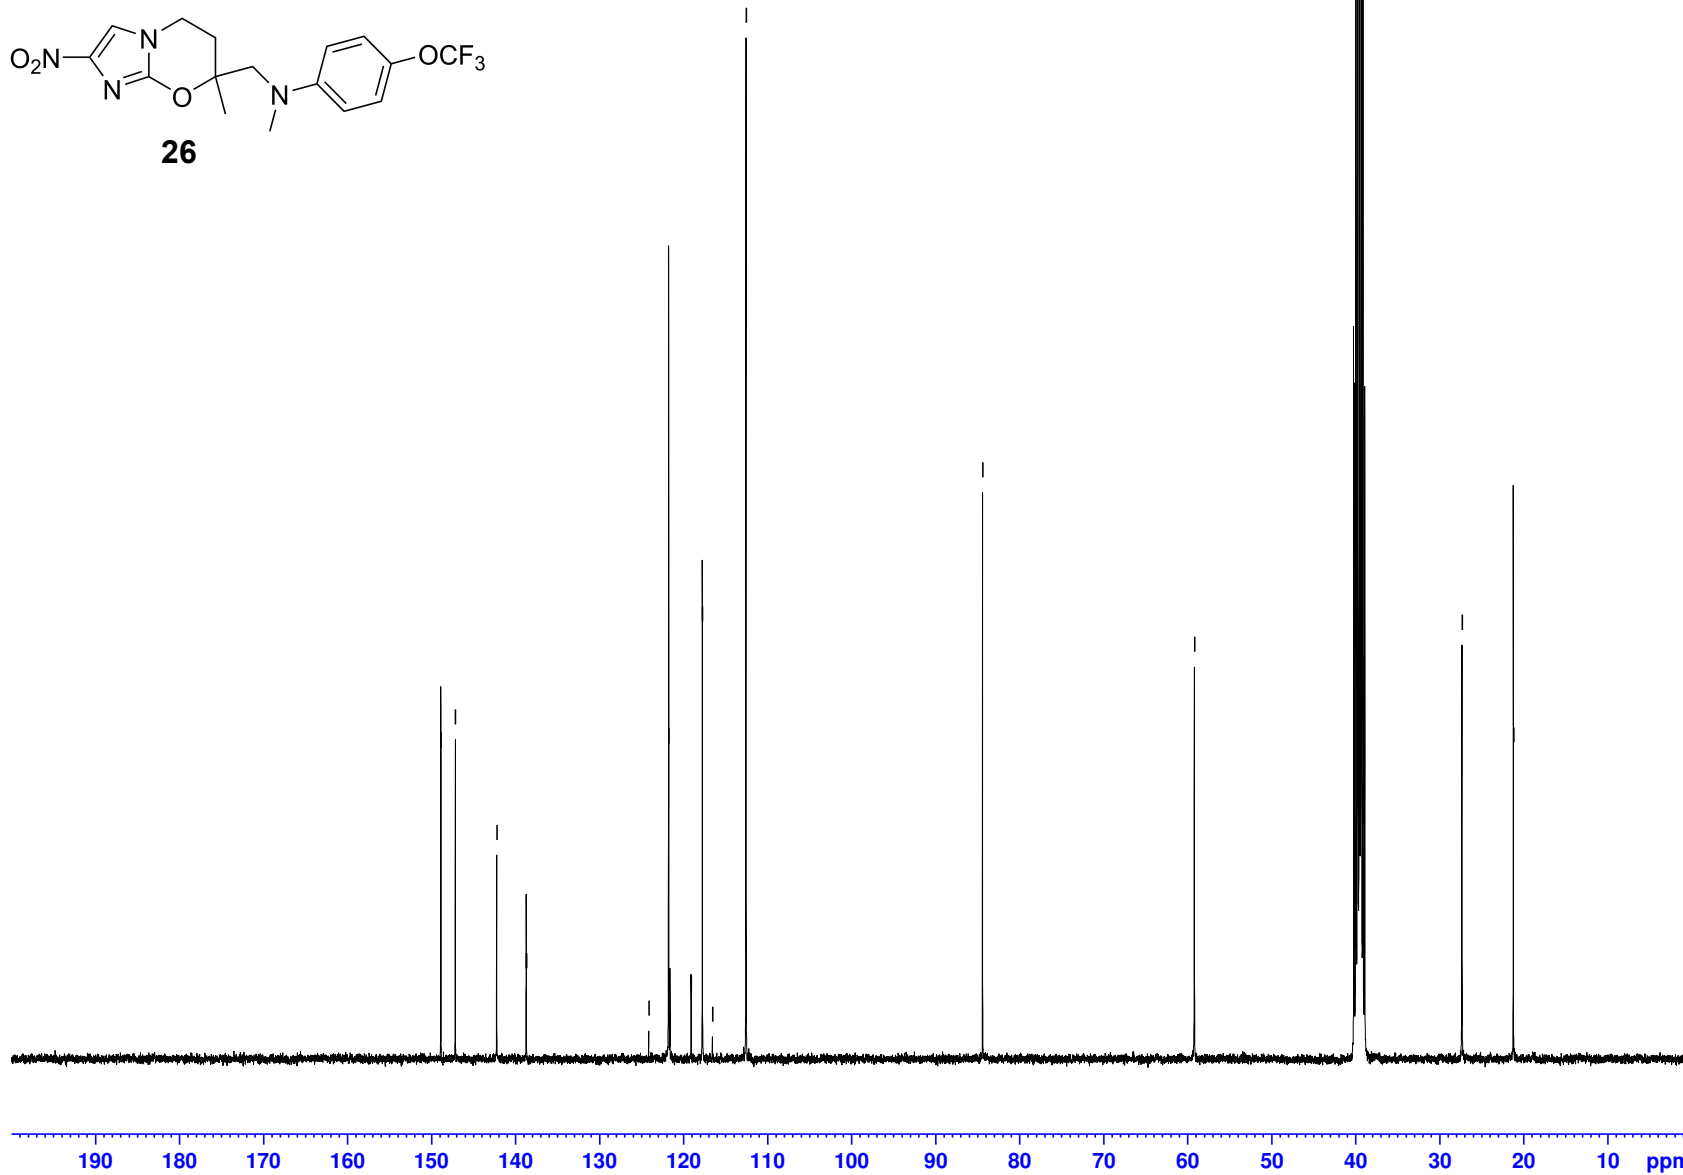

Current Data Parameters  
NAME Jan11-2016  
EXPNO 17  
PROCNO 1

F2 - Acquisition Parameters  
Date\_ 20160111  
Time 21.31 h  
INSTRUM spect  
PROBHD Z108618\_0860 (   
PULPROG zgpg50  
TD 65536  
SOLVENT DMSO  
NS 9000  
DS 4  
SWH 24038.461 Hz  
FIDRES 0.366798 Hz  
AQ 1.3631488 sec  
RG 198.55  
DW 20.800 usec  
DE 6.50 usec  
TE 298.0 K  
D1 0.63999999 sec  
D11 0.03000000 sec  
TD0 1  
SFO1 100.6228298 MHz  
NUC1 13C  
P1 10.00 usec  
PLW1 48.17399979 W  
SFO2 400.1316005 MHz  
NUC2 1H  
CPDPRG[2] waltz16  
PCPD2 90.00 usec  
PLW2 13.19999981 W  
PLW12 0.30142000 W  
PLW13 0.15161000 W

F2 - Processing parameters  
SI 32768  
SF 100.6128171 MHz  
WDW EM  
SSB 0  
LB 1.00 Hz  
GB 0  
PC 1.40

40 (in CDCl<sub>3</sub>)

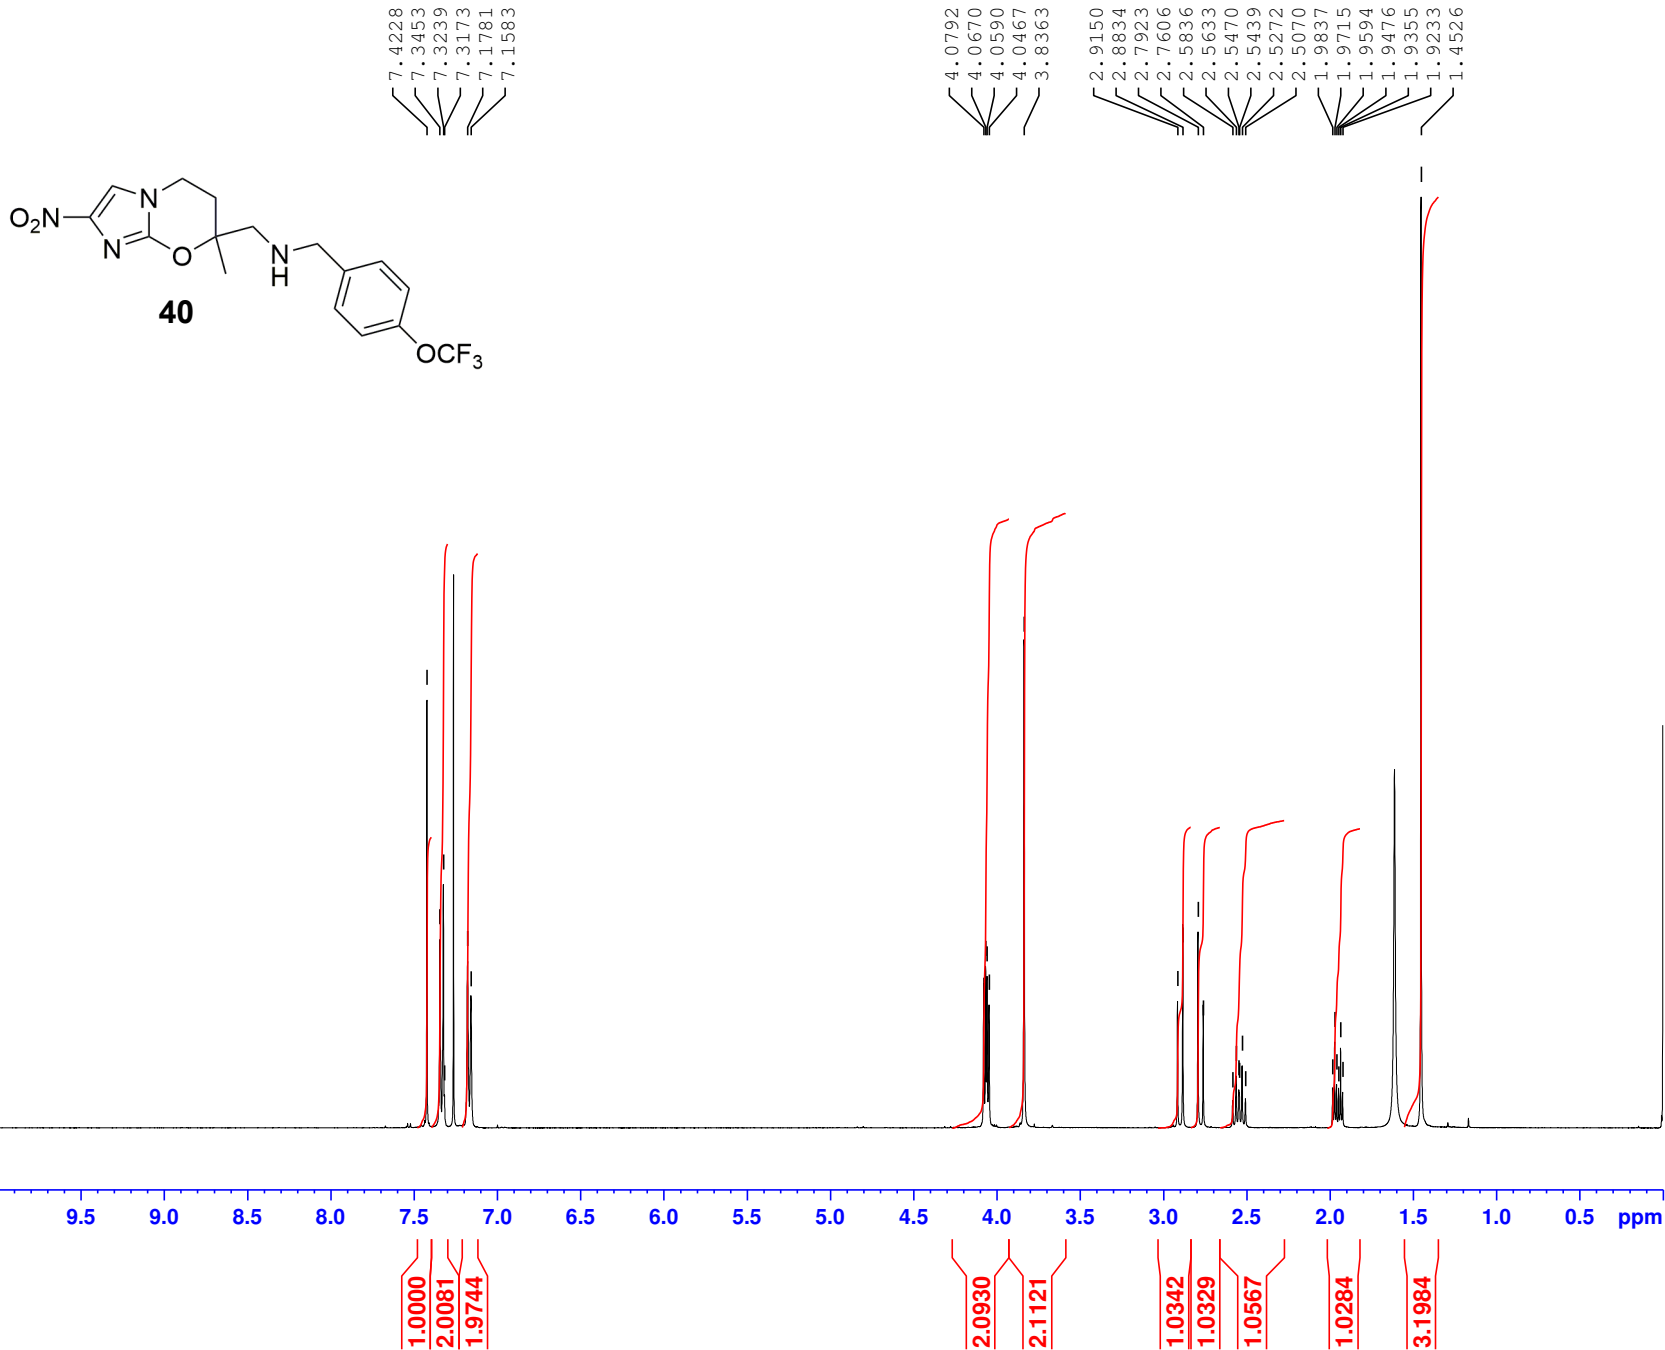

Current Data Parameters  
 NAME Aug15-2019  
 EXPNO 16  
 PROCNO 1

F2 - Acquisition Parameters  
 Date\_ 20190815  
 Time 16.39 h  
 INSTRUM spect  
 PROBHD Z108618\_0860 (  
 PULPROG zg30  
 TD 65536  
 SOLVENT CDCl3  
 NS 64  
 DS 2  
 SWH 8012.820 Hz  
 FIDRES 0.244532 Hz  
 AQ 4.0894465 sec  
 RG 176.55  
 DW 62.400 usec  
 DE 6.50 usec  
 TE 298.0 K  
 D1 1.00000000 sec  
 TD0 1  
 SFO1 400.1324708 MHz  
 NUC1 1H  
 P0 4.53 usec  
 P1 13.60 usec  
 PLW1 13.19999981 W

F2 - Processing parameters  
 SI 65536  
 SF 400.1300082 MHz  
 WDW EM  
 SSB 0  
 LB 0.30 Hz  
 GB 0  
 PC 1.00

40 (in CDCl<sub>3</sub>)

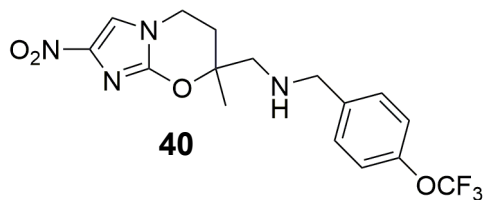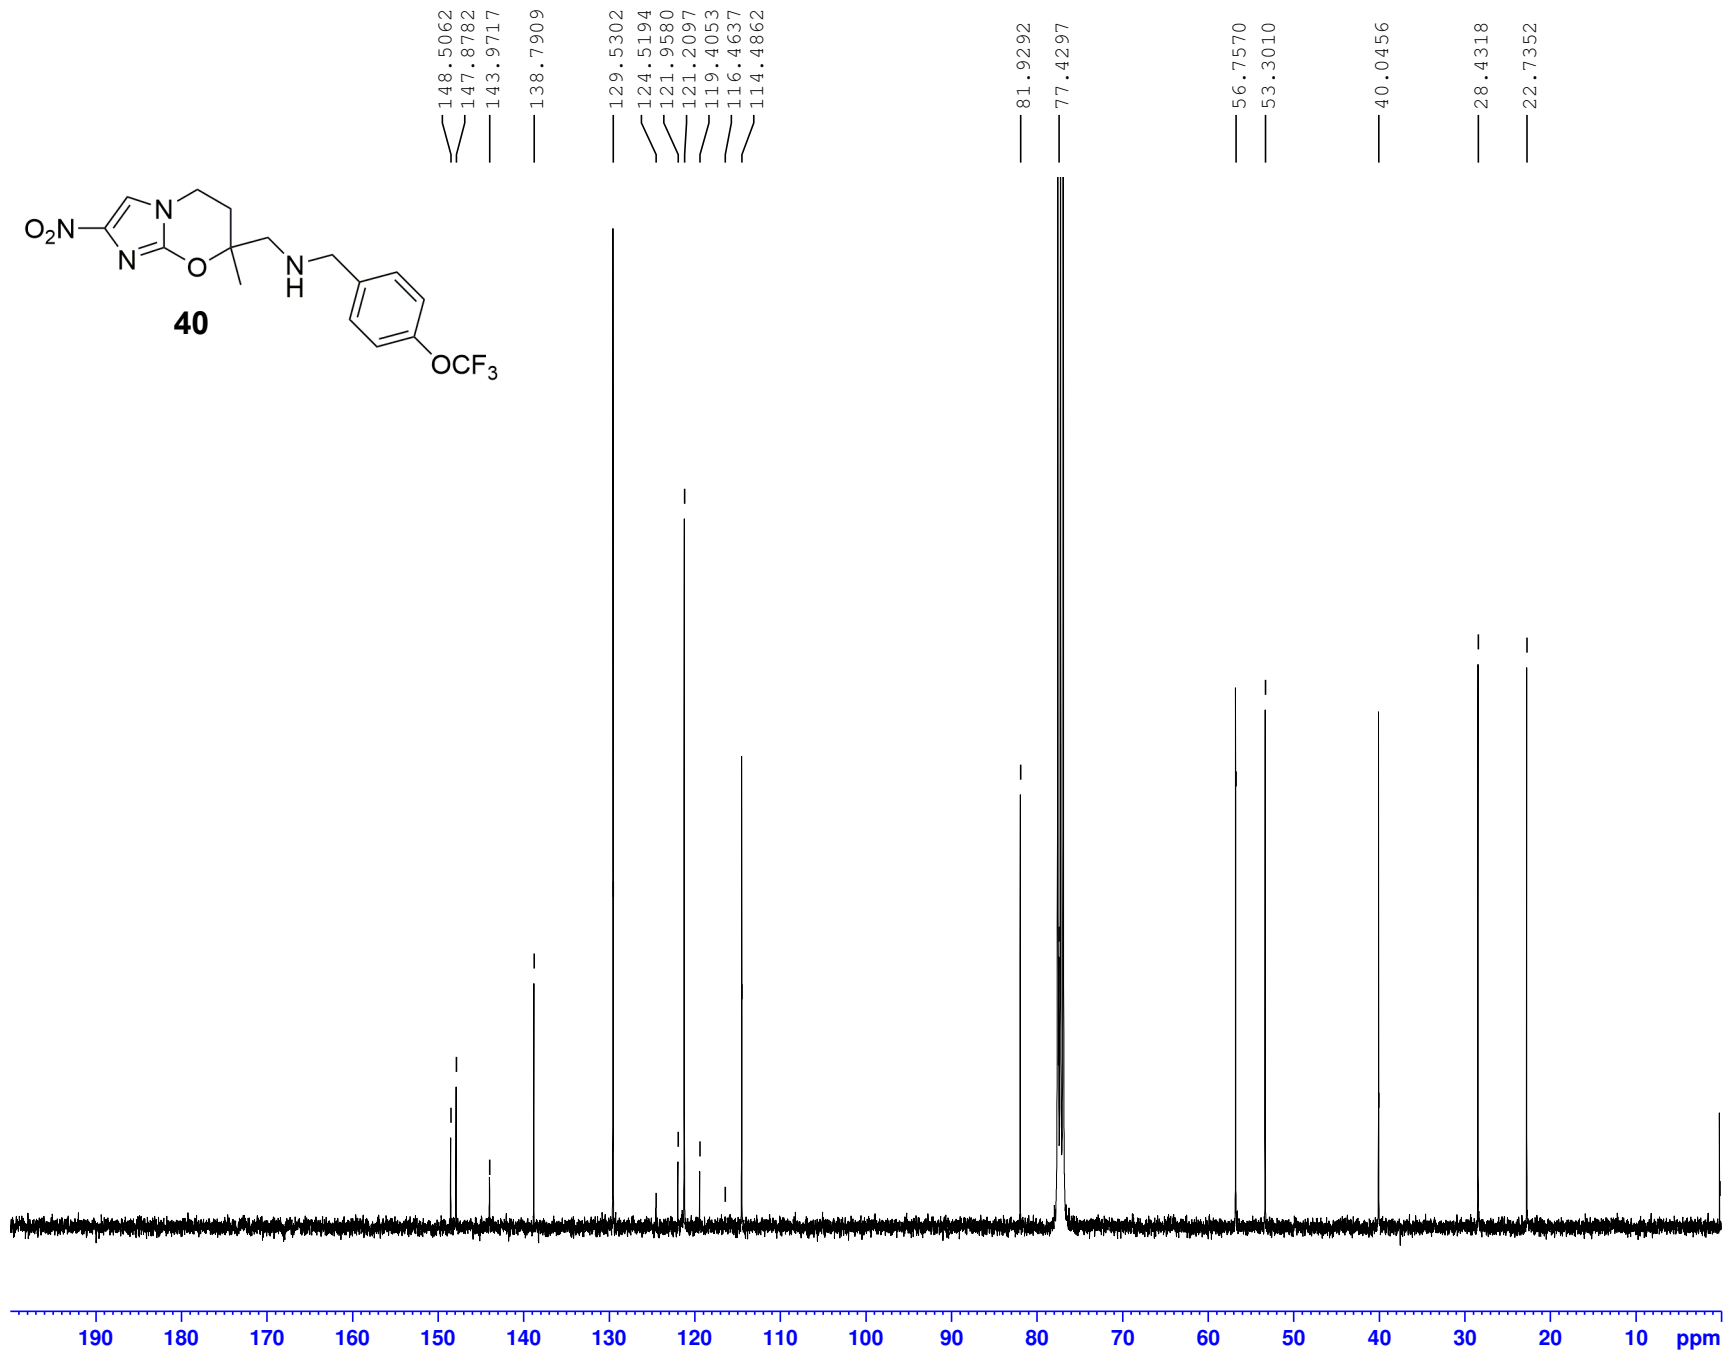

Current Data Parameters  
 NAME Aug15-2019  
 EXPNO 17  
 PROCNO 1

F2 - Acquisition Parameters  
 Date\_ 20190816  
 Time 4.09 h  
 INSTRUM spect  
 PROBHD Z108618\_0860 (  
 PULPROG zgpg50  
 TD 65536  
 SOLVENT CDCl3  
 NS 20000  
 DS 4  
 SWH 24038.461 Hz  
 FIDRES 0.733596 Hz  
 AQ 1.3631488 sec  
 RG 198.55  
 DW 20.800 usec  
 DE 6.50 usec  
 TE 298.0 K  
 D1 0.63999999 sec  
 D11 0.03000000 sec  
 TD0 1  
 SFO1 100.6228298 MHz  
 NUC1 13C  
 P1 10.00 usec  
 PLW1 48.17399979 W  
 SFO2 400.1316005 MHz  
 NUC2 1H  
 CPDPRG[2] waltz16  
 PCPD2 90.00 usec  
 PLW2 13.19999981 W  
 PLW12 0.30142000 W  
 PLW13 0.15161000 W

F2 - Processing parameters  
 SI 32768  
 SF 100.6127480 MHz  
 WDW EM  
 SSB 0  
 LB 1.00 Hz  
 GB 0  
 PC 1.40

44 (in D<sub>6</sub>-DMSO)

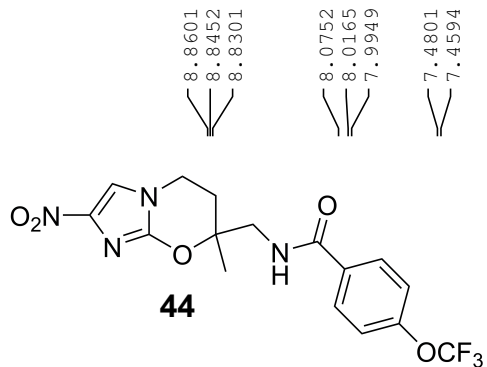

8.8601  
8.8452  
8.8301

8.0752  
8.0165  
7.9949

7.4801  
7.4594

4.2354  
4.2221  
4.2039  
4.1895  
4.1763  
4.1038  
4.0898  
4.0833  
4.0697  
4.0576  
4.0506  
4.0362  
3.6635  
3.6474  
3.6282  
3.6146  
3.6016  
3.5818  
3.5664  
2.2151  
2.1945  
2.1791  
2.1585  
2.1436  
2.1127  
2.1000  
2.0865  
2.0639  
2.0509  
1.3949

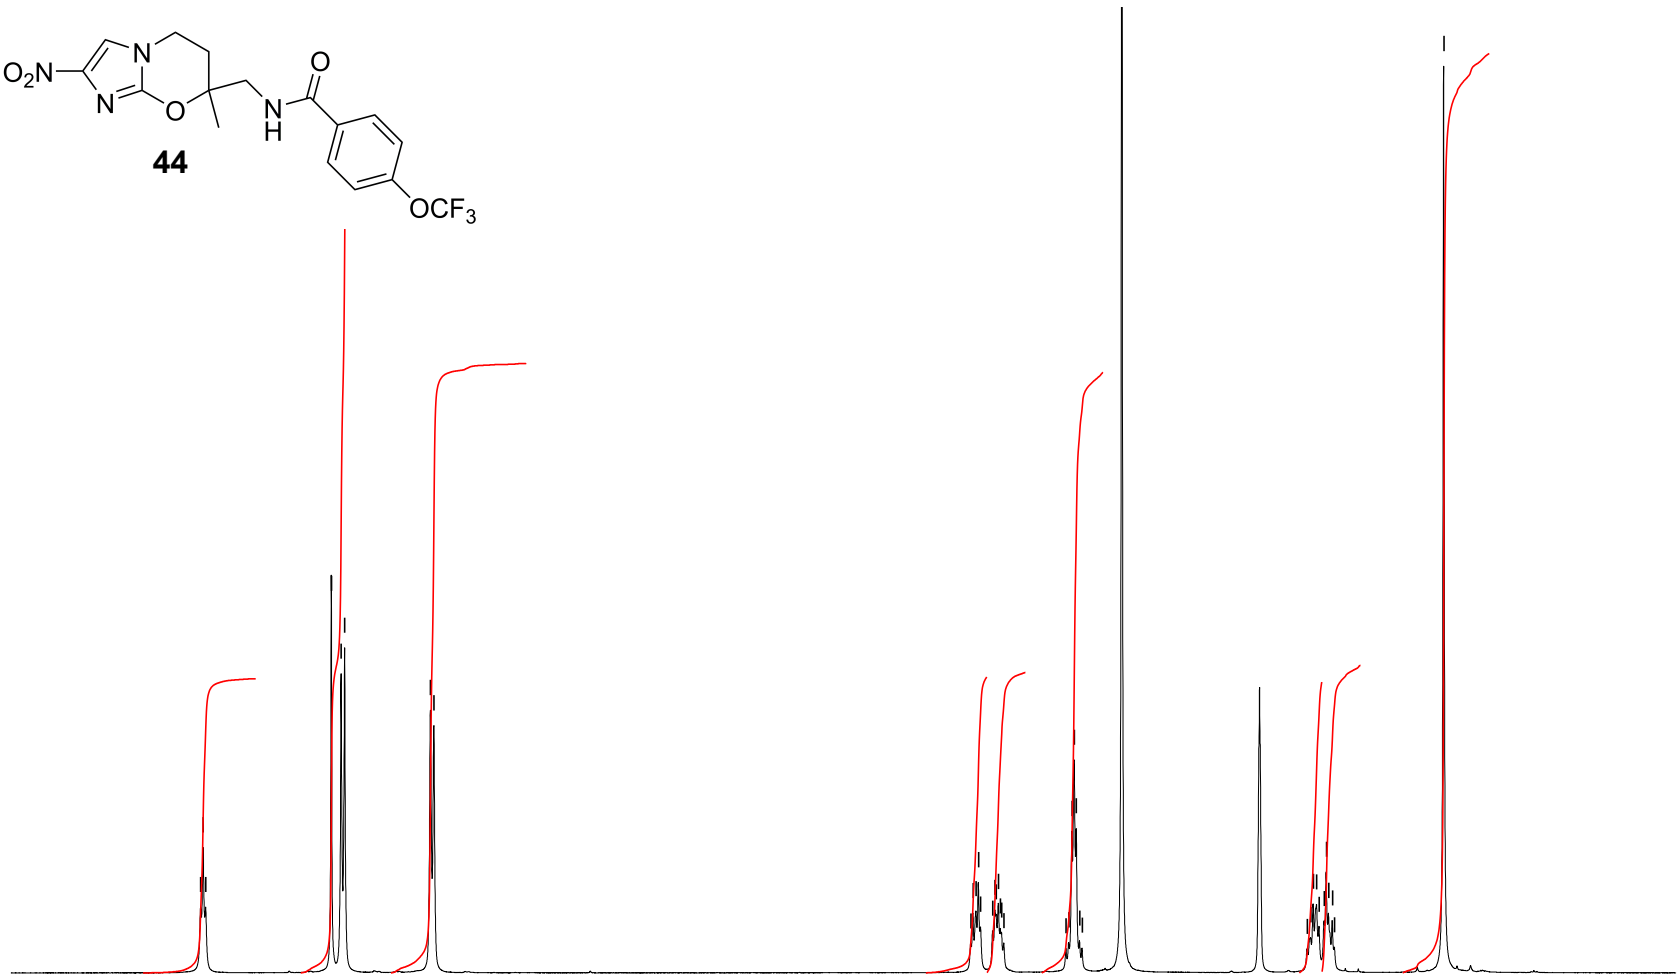

Current Data Parameters  
NAME Aug07-2015-FMHSacsr  
EXPNO 50  
PROCNO 1

F2 - Acquisition Parameters  
Date\_ 20150810  
Time 1.20 h  
INSTRUM spect  
PROBHD 5 mm BBO BB-1H  
PULPROG zg30  
TD 65536  
SOLVENT DMSO  
NS 64  
DS 2  
SWH 8389.262 Hz  
FIDRES 0.256020 Hz  
AQ 3.9059455 sec  
RG 161.3  
DW 59.600 usec  
DE 10.00 usec  
TE 298.0 K  
D1 2.00000000 sec  
TD0 1  
SFO1 400.1334011 MHz  
NUC1 1H  
P1 11.00 usec

F2 - Processing parameters  
SI 32768  
SF 400.1300021 MHz  
WDW EM  
SSB 0  
LB 0.30 Hz  
GB 0  
PC 1.00

1.0000

3.0472

2.0719

1.0070

1.0216

2.0419

0.9885

1.0458

3.1253

44 (in D<sub>6</sub>-DMSO)

165.8952  
 150.3295  
 147.2736  
 142.2368  
 133.2634  
 129.8184  
 123.7785  
 121.2257  
 120.5837  
 118.6699  
 117.6867  
 116.1221  
 81.8020  
 46.0177  
 27.4141  
 22.0957

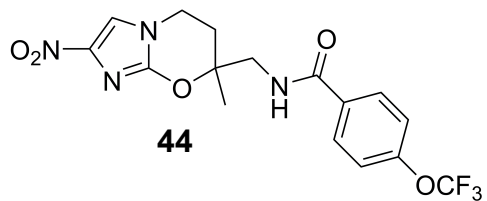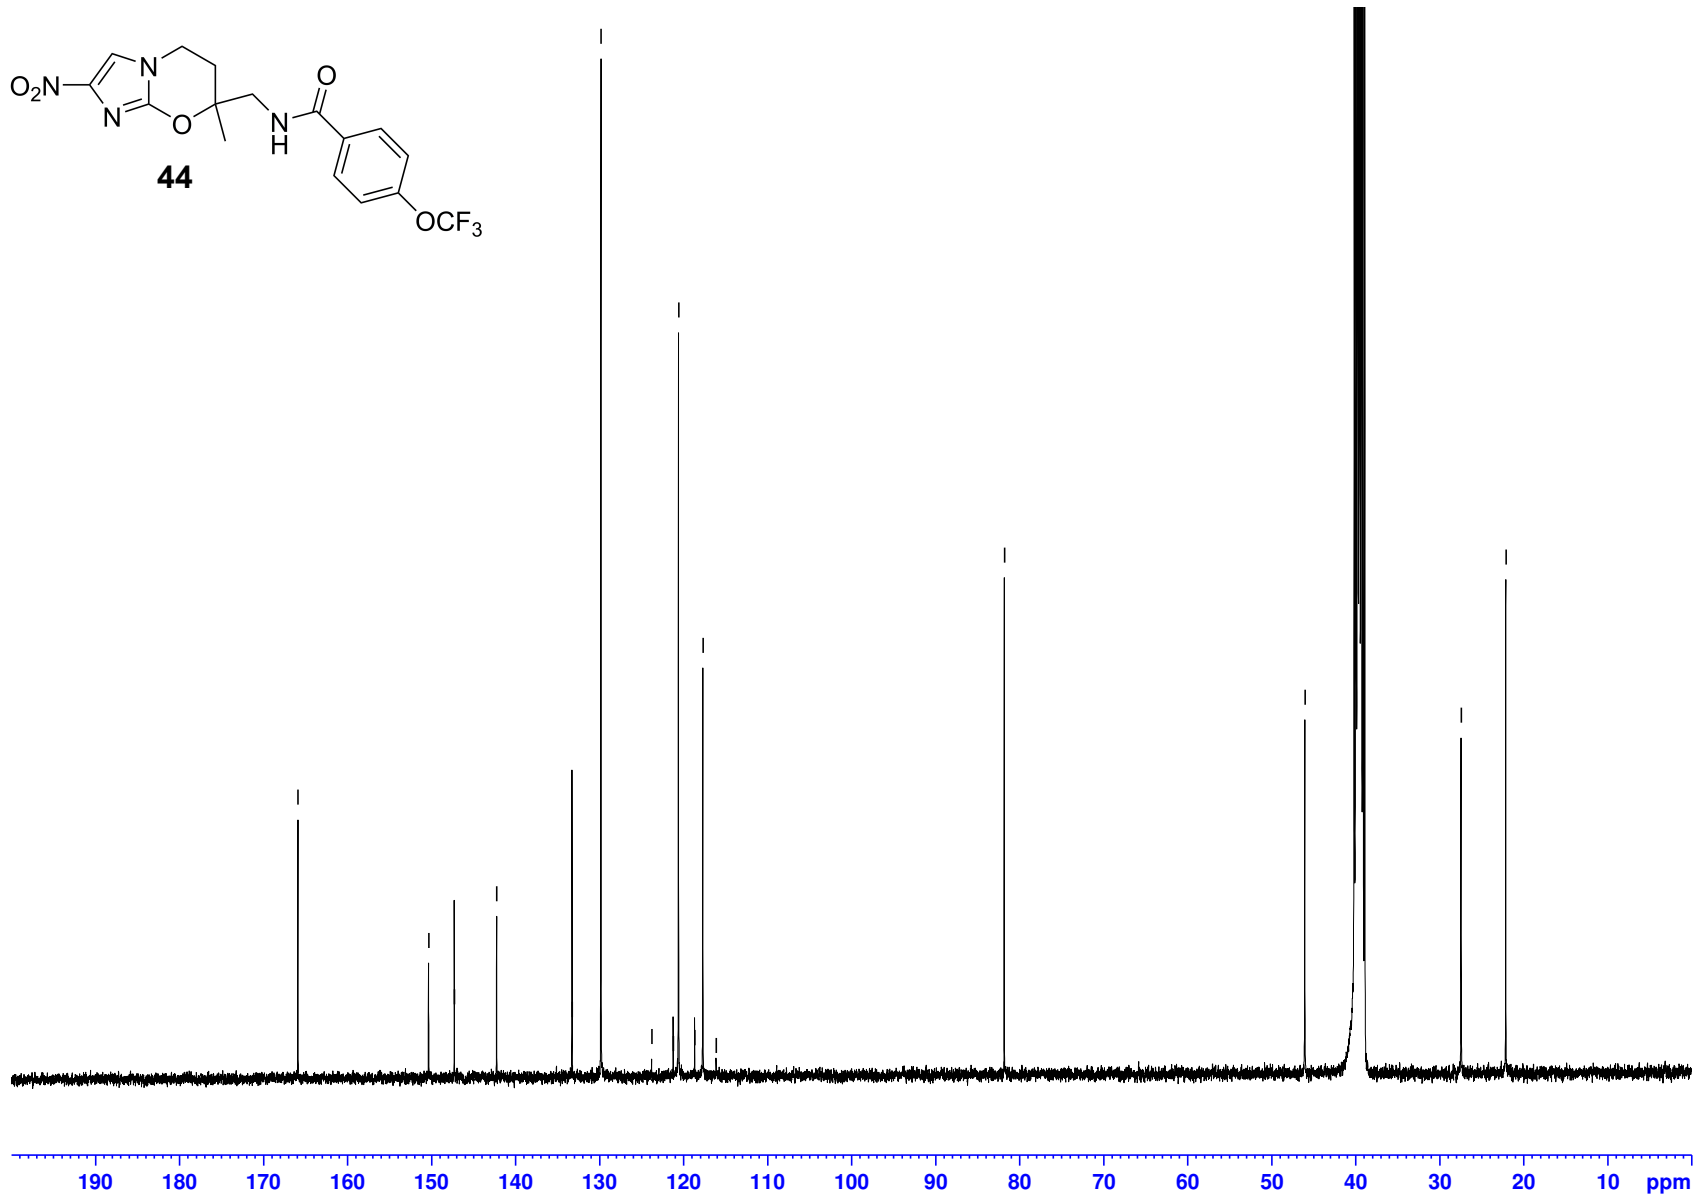

Current Data Parameters  
 NAME Aug07-2015-FMHSacsrcnmr  
 EXPNO 51  
 PROCNO 1

F2 - Acquisition Parameters

Date\_ 20150810  
 Time 6.32 h  
 INSTRUM spect  
 PROBHD 5 mm BBO BB-1H  
 PULPROG zgpg50  
 TD 65536  
 SOLVENT DMSO  
 NS 9000  
 DS 4  
 SWH 26178.010 Hz  
 FIDRES 0.798889 Hz  
 AQ 1.2517376 sec  
 RG 11585.2  
 DW 19.100 usec  
 DE 10.00 usec  
 TE 298.0 K  
 D1 0.75000000 sec  
 d11 0.03000000 sec  
 DELTA 0.64999998 sec  
 TD0 1  
 SFO1 100.6248425 MHz  
 NUC1 13C  
 P1 11.80 usec  
 SFO2 400.1316005 MHz  
 NUC2 1H  
 CPDPRG[2] waltz16  
 PCPD2 100.00 usec

F2 - Processing parameters

SI 32768  
 SF 100.6128170 MHz  
 WDW EM  
 SSB 0  
 LB 1.00 Hz  
 GB 0  
 PC 1.40

45 (in D<sub>6</sub>-DMSO)

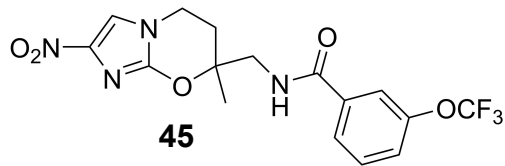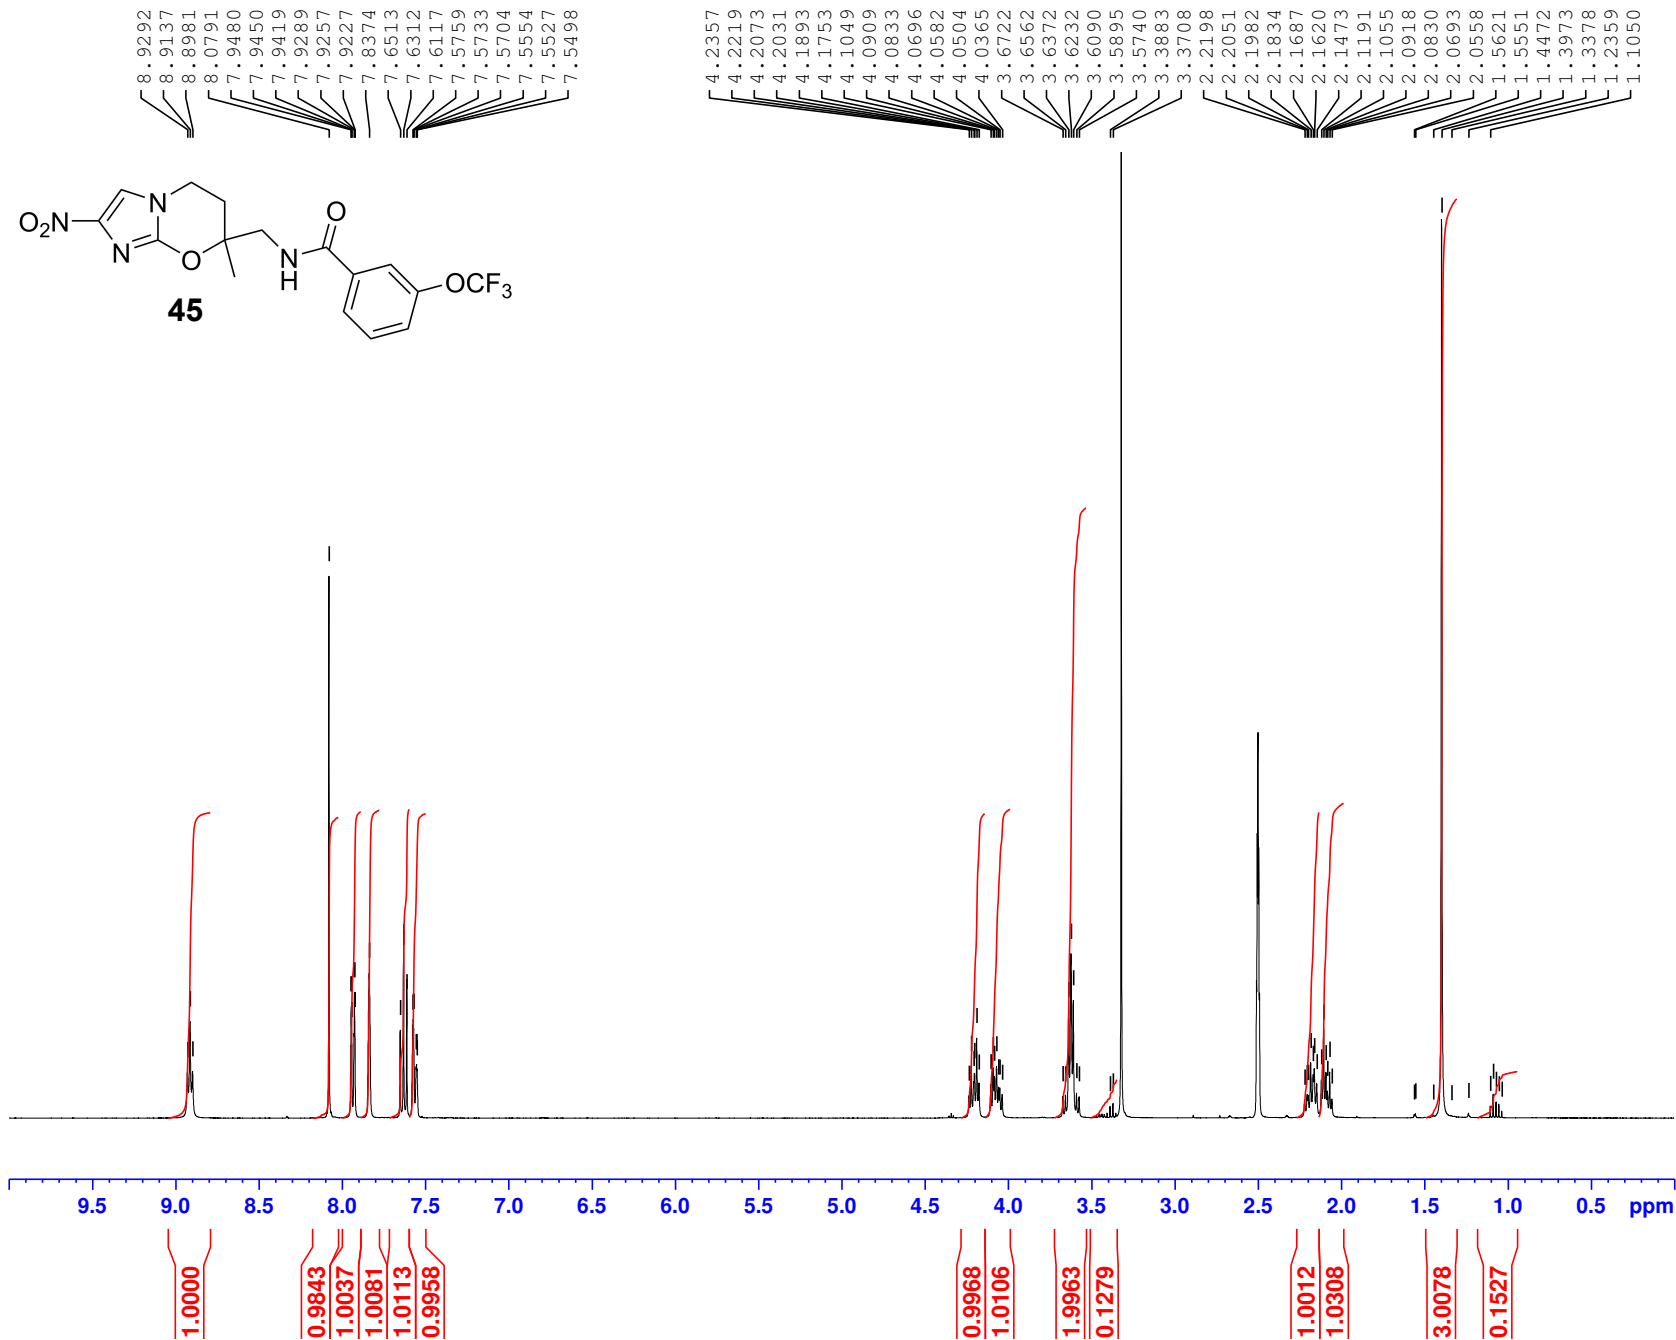

Current Data Parameters  
 NAME Dec04-2020  
 EXPNO 5  
 PROCNO 1

F2 - Acquisition Parameters  
 Date\_ 20201205  
 Time 14.55 h  
 INSTRUM spect  
 PROBHD Z108618\_0860 (  
 PULPROG zg30  
 TD 65536  
 SOLVENT DMSO  
 NS 64  
 DS 2  
 SWH 8012.820 Hz  
 FIDRES 0.244532 Hz  
 AQ 4.0894465 sec  
 RG 176.55  
 DW 62.400 usec  
 DE 6.50 usec  
 TE 298.0 K  
 D1 1.00000000 sec  
 TD0 1  
 SFO1 400.1324708 MHz  
 NUC1 1H  
 P0 4.53 usec  
 P1 13.60 usec  
 PLW1 13.19999981 W

F2 - Processing parameters  
 SI 65536  
 SF 400.1300026 MHz  
 WDW EM  
 SSB 0  
 LB 0.30 Hz  
 GB 0  
 PC 1.00

45 (in D<sub>6</sub>-DMSO)

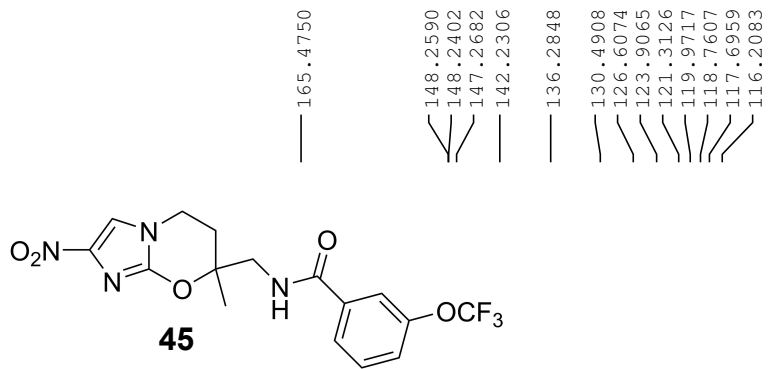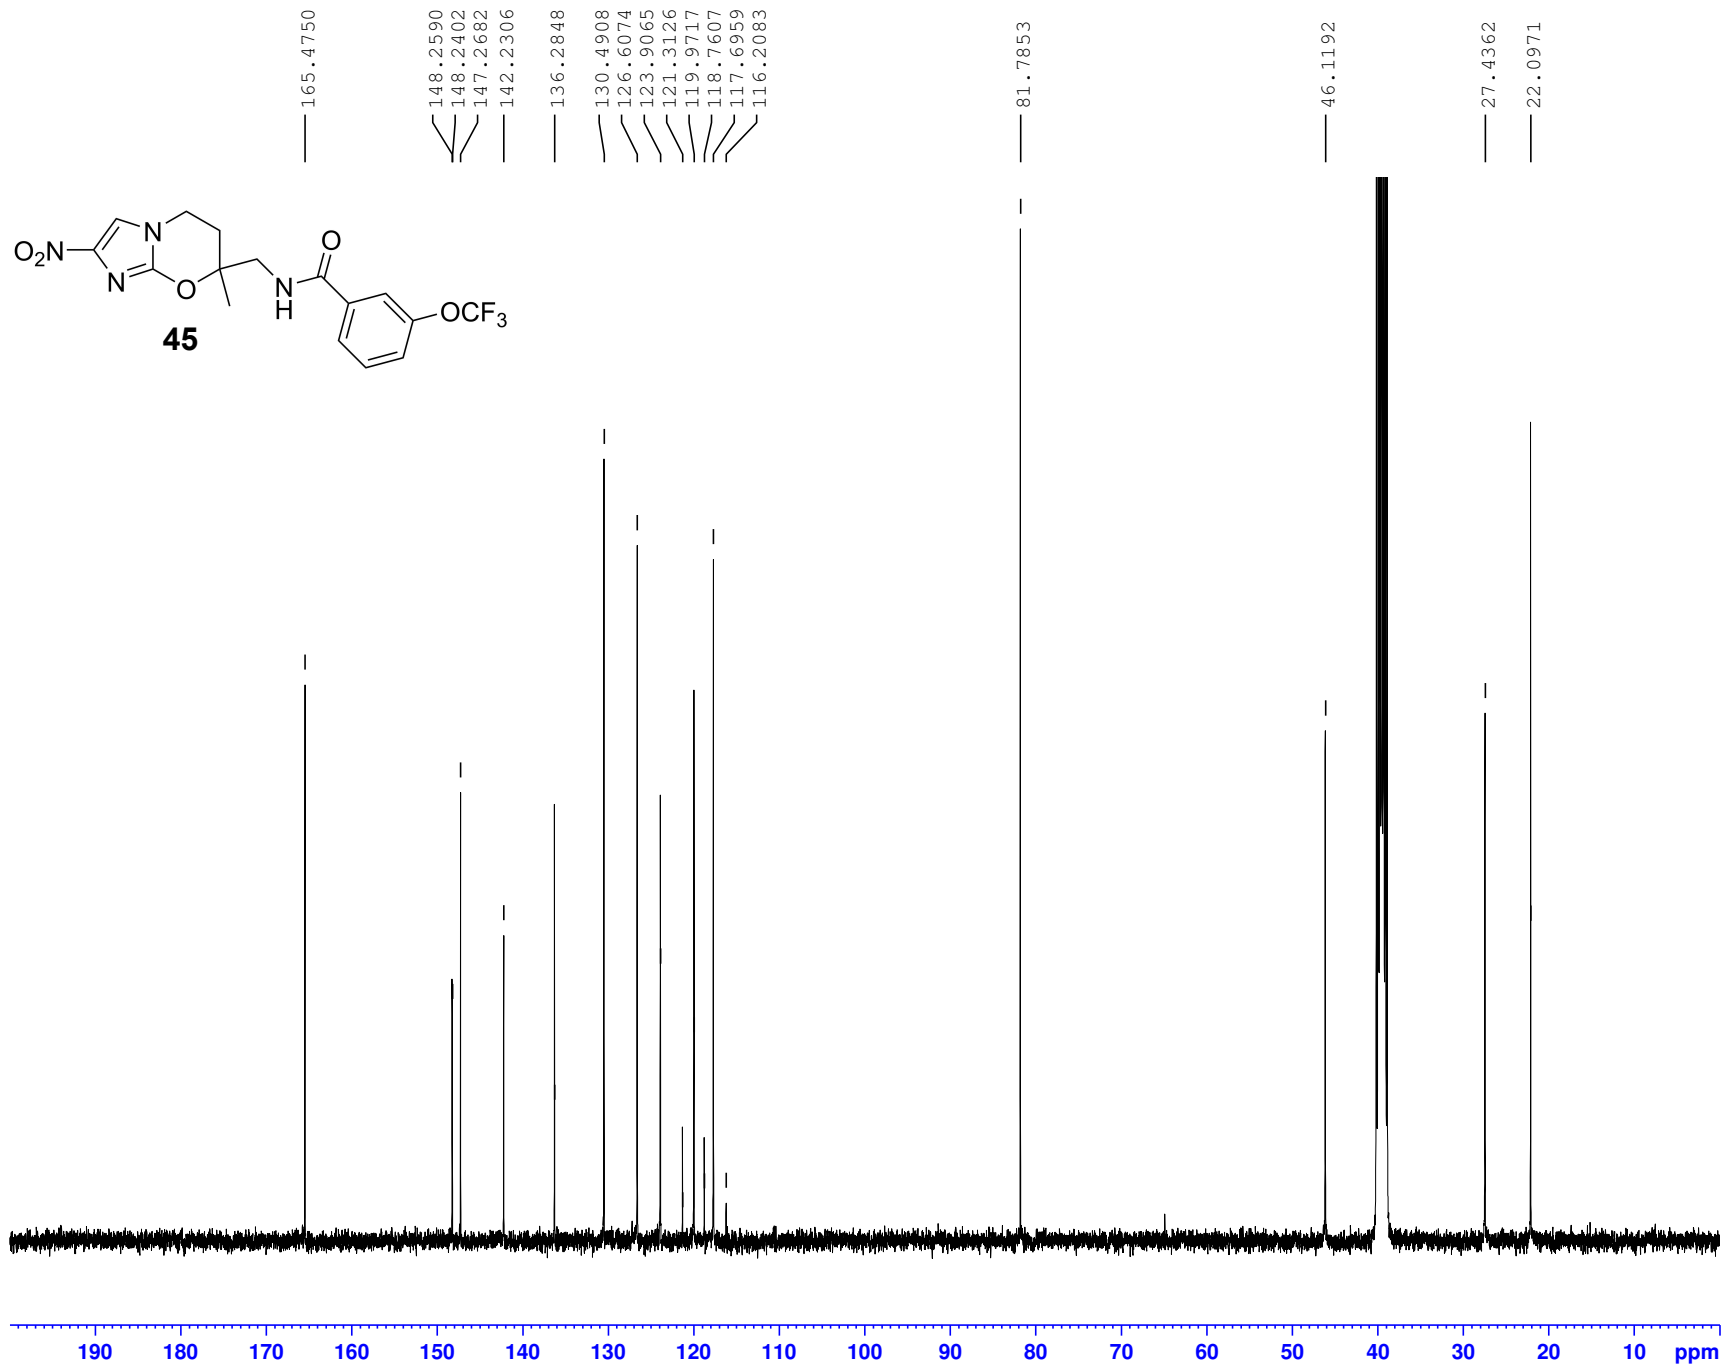

Current Data Parameters  
 NAME Dec04-2020  
 EXPNO 6  
 PROCNO 1

F2 - Acquisition Parameters  
 Date\_ 20201205  
 Time 21.49 h  
 INSTRUM spect  
 PROBHD z108618\_0860 ( )  
 PULPROG zgpg50  
 TD 65536  
 SOLVENT DMSO  
 NS 12000  
 DS 4  
 SWH 24038.461 Hz  
 FIDRES 0.733596 Hz  
 AQ 1.3631488 sec  
 RG 198.55  
 DW 20.800 usec  
 DE 6.50 usec  
 TE 298.0 K  
 D1 0.63999999 sec  
 D11 0.03000000 sec  
 TD0 1  
 SFO1 100.6228298 MHz  
 NUC1 13C  
 P1 10.00 usec  
 PLW1 48.17399979 W  
 SFO2 400.1316005 MHz  
 NUC2 1H  
 CPDPRG[2] waltz16  
 PCPD2 90.00 usec  
 PLW2 13.19999981 W  
 PLW12 0.30142000 W  
 PLW13 0.15161000 W

F2 - Processing parameters  
 SI 32768  
 SF 100.6128174 MHz  
 WDW EM  
 SSB 0  
 LB 1.00 Hz  
 GB 0  
 PC 1.40



47 (in D<sub>6</sub>-DMSO)

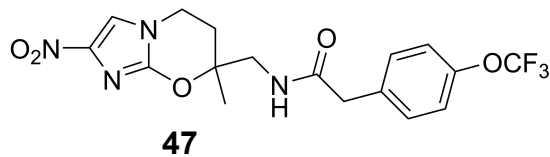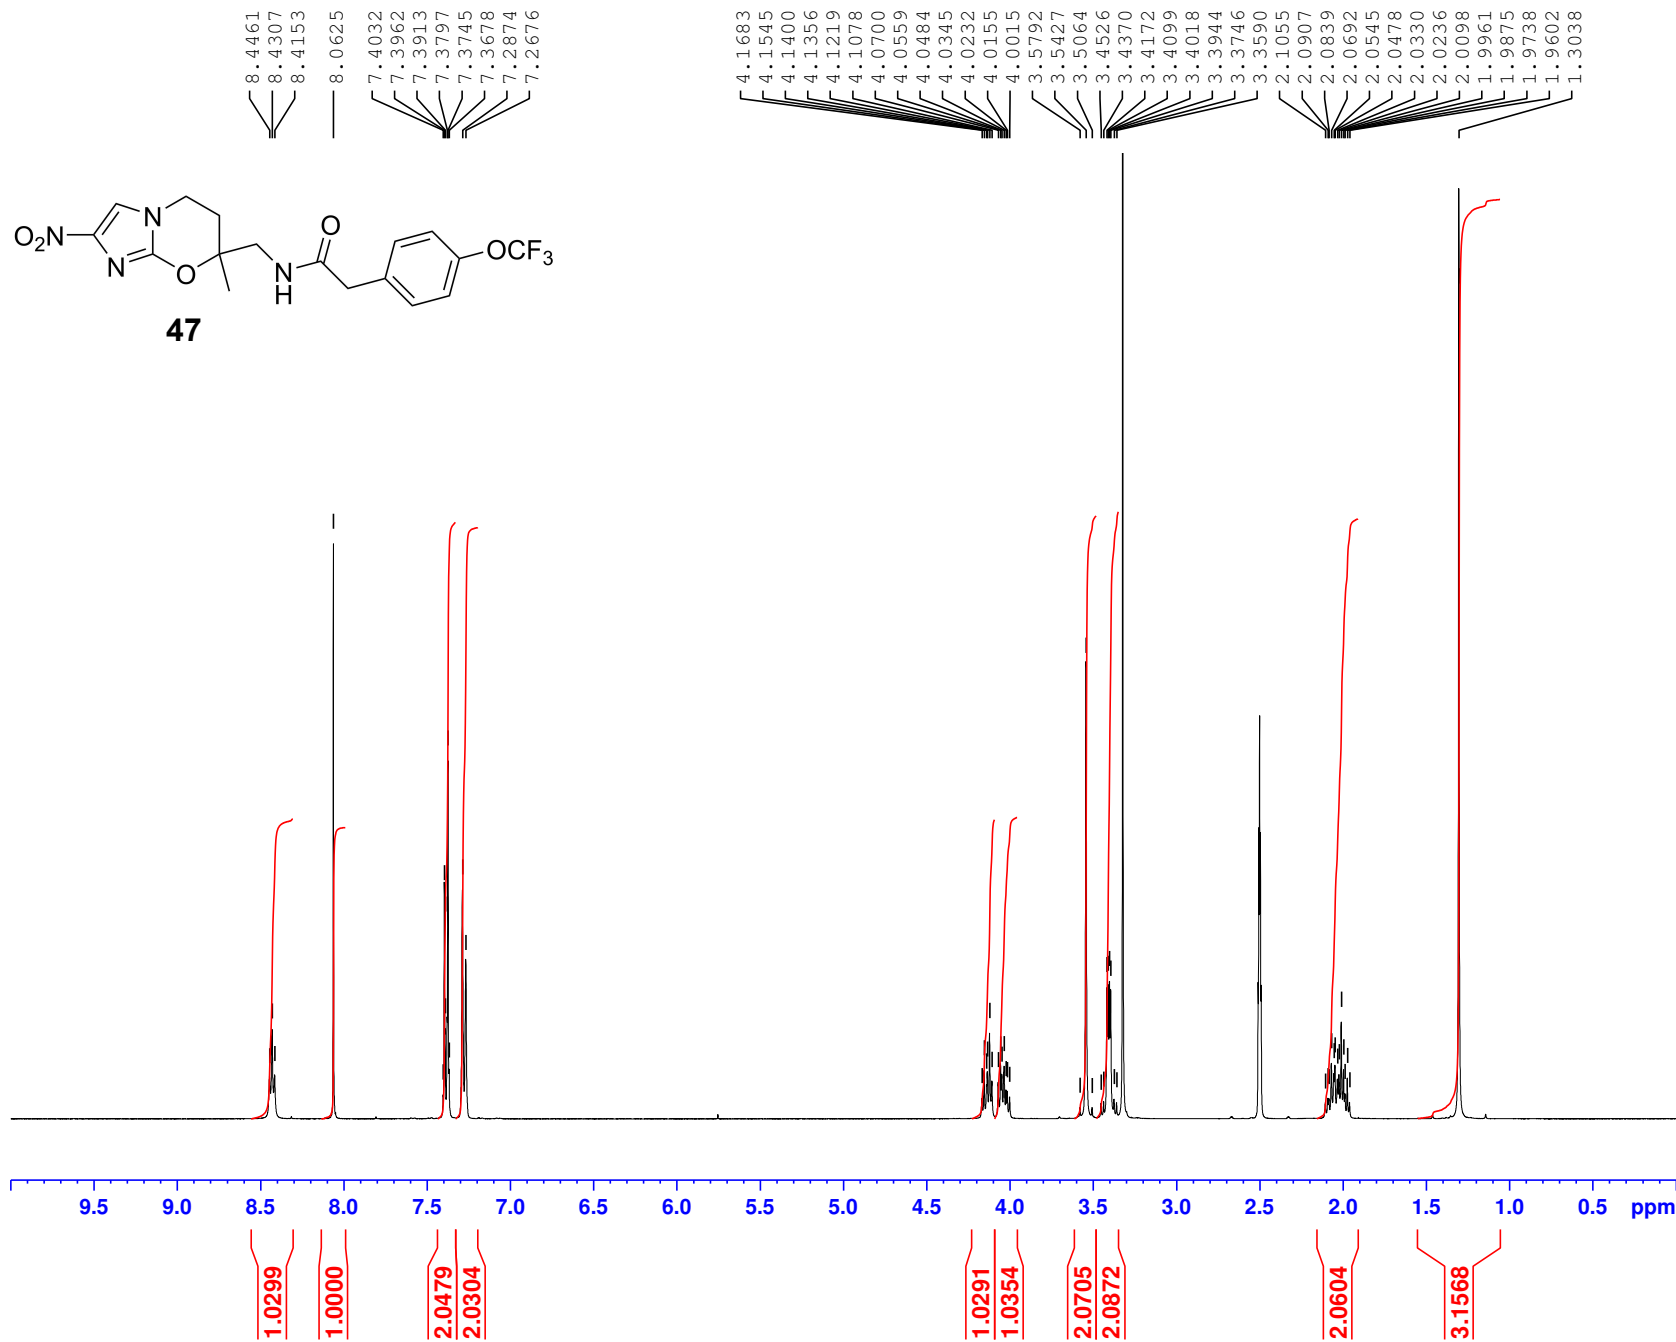

Current Data Parameters  
 NAME May29-2020  
 EXPNO 37  
 PROCNO 1

F2 - Acquisition Parameters  
 Date\_ 20200601  
 Time 17.40 h  
 INSTRUM spect  
 PROBHD Z108618\_0860 (  
 PULPROG zg30  
 TD 65536  
 SOLVENT DMSO  
 NS 64  
 DS 2  
 SWH 8012.820 Hz  
 FIDRES 0.244532 Hz  
 AQ 4.0894465 sec  
 RG 156.54  
 DW 62.400 usec  
 DE 6.50 usec  
 TE 298.0 K  
 D1 1.00000000 sec  
 TD0 1  
 SFO1 400.1324708 MHz  
 NUC1 1H  
 P0 4.53 usec  
 P1 13.60 usec  
 PLW1 13.19999981 W

F2 - Processing parameters  
 SI 65536  
 SF 400.1300026 MHz  
 WDW EM  
 SSB 0  
 LB 0.30 Hz  
 GB 0  
 PC 1.00

47 (in D<sub>6</sub>-DMSO)

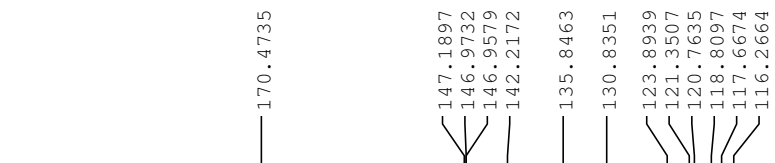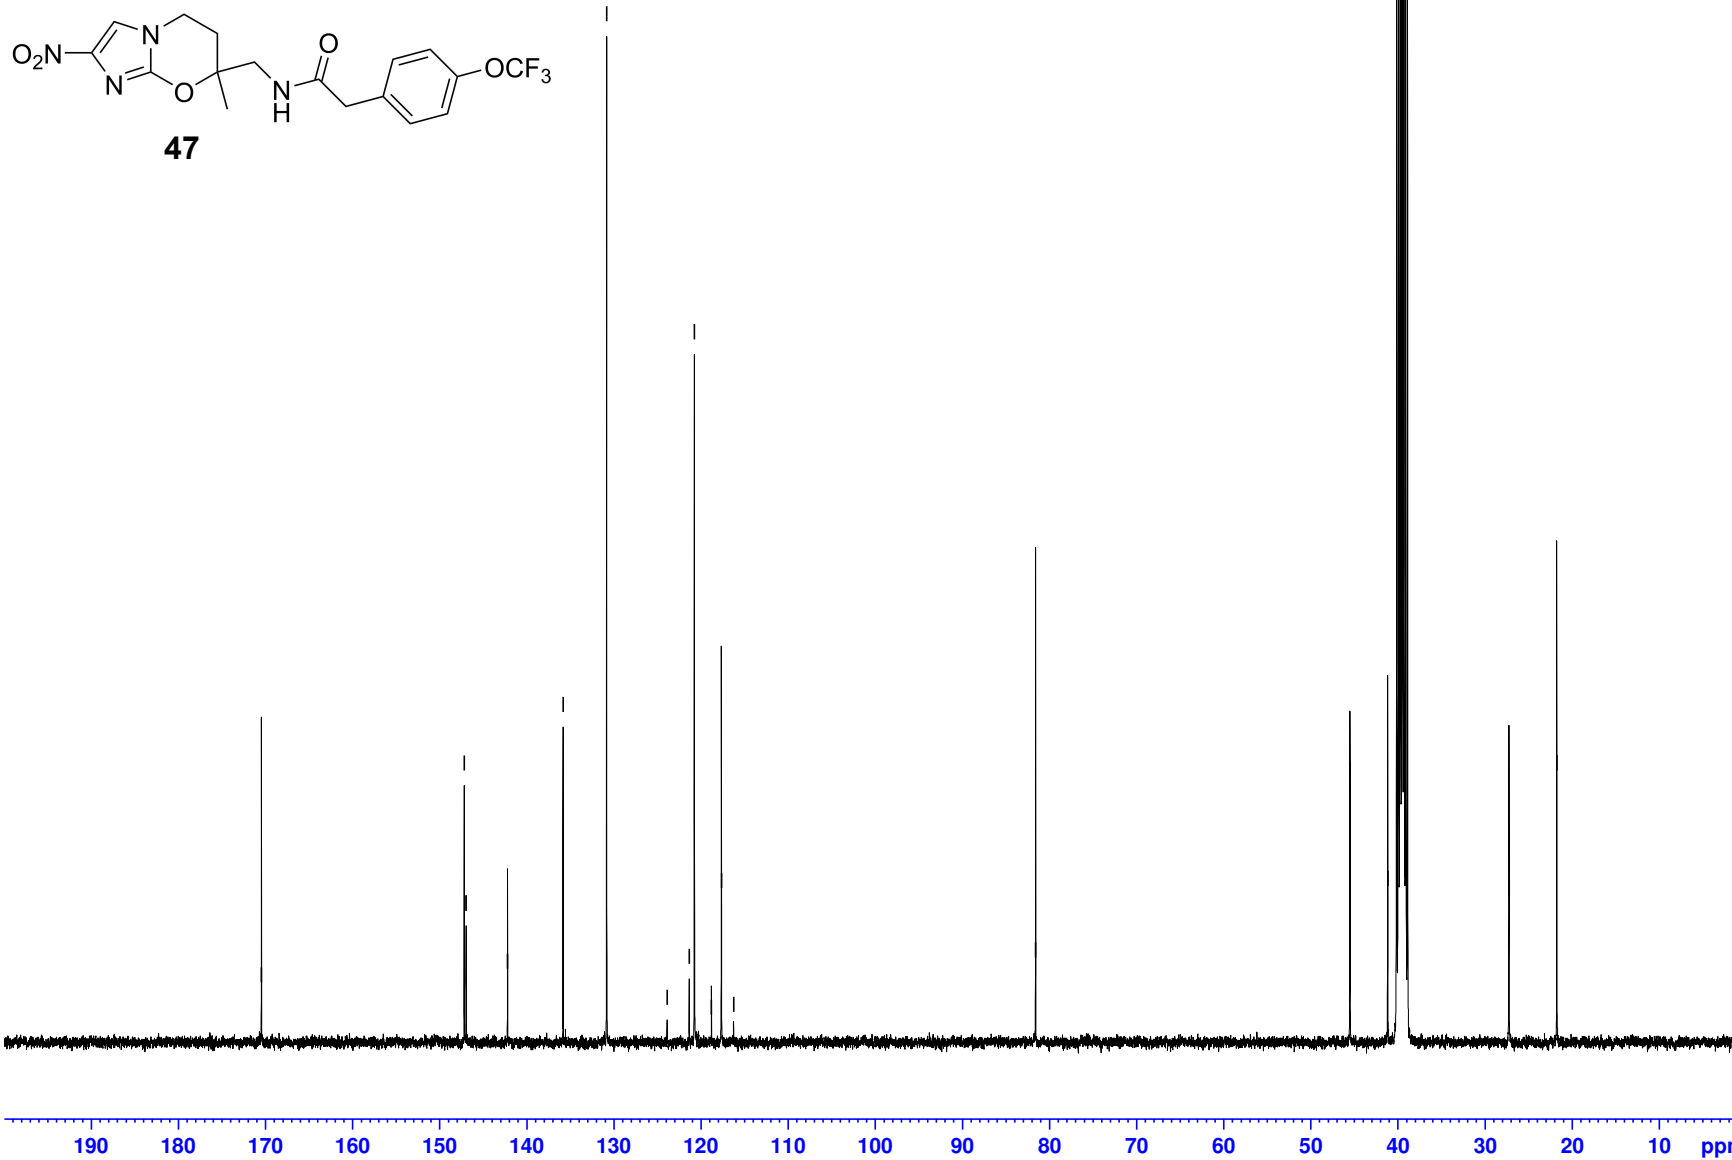

Current Data Parameters  
 NAME May29-2020  
 EXPNO 38  
 PROCNO 1

F2 - Acquisition Parameters  
 Date\_ 20200602  
 Time 0.35 h  
 INSTRUM spect  
 PROBHD Z108618\_0860 ( )  
 PULPROG zgpg50  
 TD 65536  
 SOLVENT DMSO  
 NS 12000  
 DS 4  
 SWH 24038.461 Hz  
 FIDRES 0.733596 Hz  
 AQ 1.3631488 sec  
 RG 198.55  
 DW 20.800 usec  
 DE 6.50 usec  
 TE 297.8 K  
 D1 0.63999999 sec  
 D11 0.03000000 sec  
 TD0 1  
 SF01 100.6228298 MHz  
 NUC1 13C  
 P1 10.00 usec  
 PLW1 48.17399979 W  
 SFO2 400.1316005 MHz  
 NUC2 1H  
 CPDPRG[2] waltz16  
 PCPD2 90.00 usec  
 PLW2 13.19999981 W  
 PLW12 0.30142000 W  
 PLW13 0.15161000 W

F2 - Processing parameters  
 SI 32768  
 SF 100.6128172 MHz  
 WDW EM  
 SSB 0  
 LB 1.00 Hz  
 GB 0  
 PC 1.40

49 (in D<sub>6</sub>-DMSO)

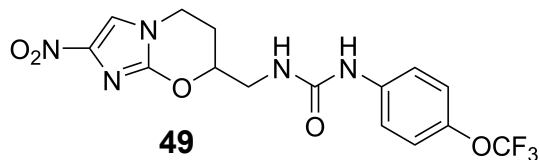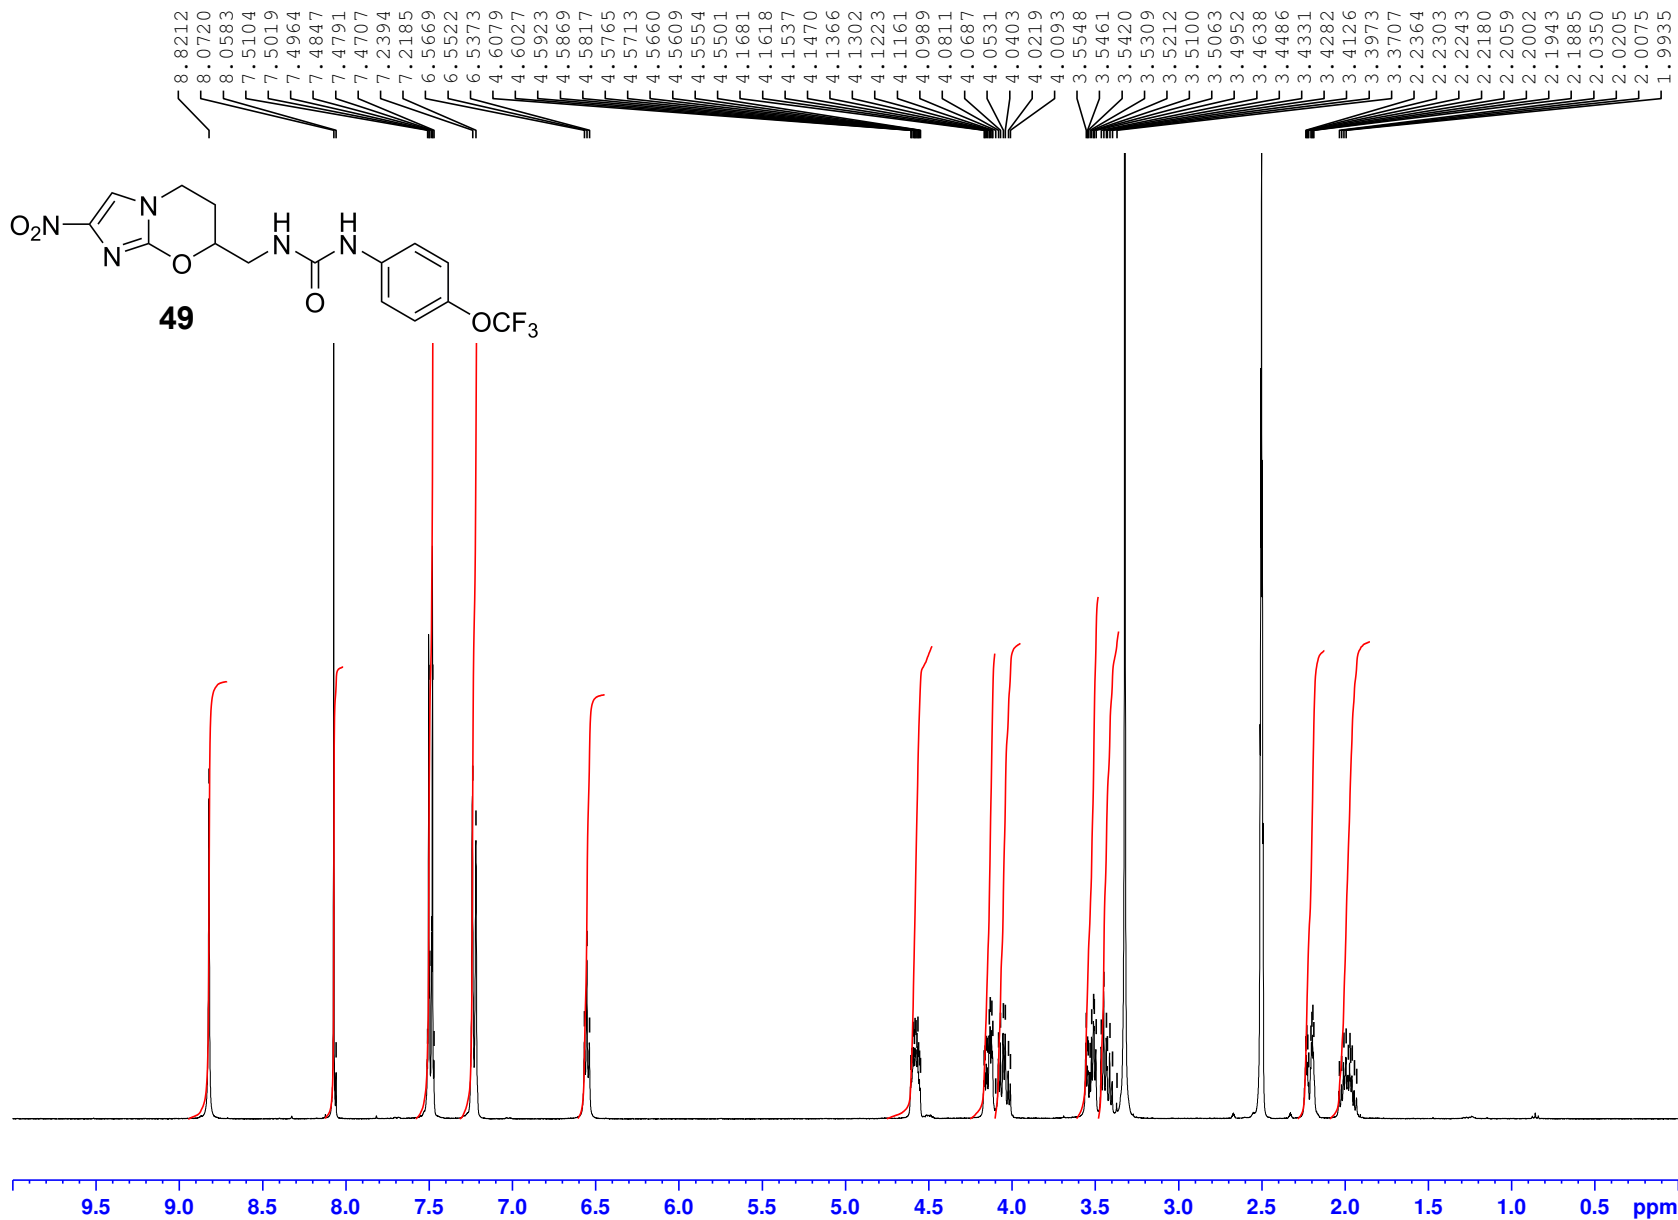

Current Data Parameters  
 NAME Jan25-2017  
 EXPNO 20  
 PROCNO 1

F2 - Acquisition Parameters  
 Date\_ 20170126  
 Time 0.38 h  
 INSTRUM spect  
 PROBHD Z108618\_0860 (  
 PULPROG zg30  
 TD 65536  
 SOLVENT DMSO  
 NS 64  
 DS 2  
 SWH 8012.820 Hz  
 FIDRES 0.244532 Hz  
 AQ 4.0894465 sec  
 RG 176.55  
 DW 62.400 usec  
 DE 6.50 usec  
 TE 298.0 K  
 D1 1.00000000 sec  
 TD0 1  
 SFO1 400.1324708 MHz  
 NUC1 1H  
 P1 13.60 usec  
 PLW1 13.19999981 W

F2 - Processing parameters  
 SI 65536  
 SF 400.1300025 MHz  
 WDW EM  
 SSB 0  
 LB 0.30 Hz  
 GB 0  
 PC 1.00

49 (in D<sub>6</sub>-DMSO)

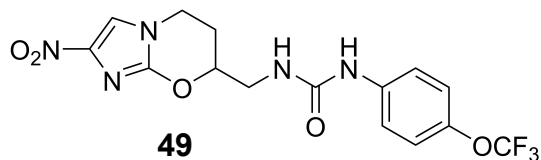

155.0826  
 147.8975  
 142.1447  
 142.1290  
 142.0218  
 139.5676  
 123.9838  
 121.6278  
 121.4442  
 118.9116  
 118.7448  
 117.7618  
 116.3655  
 77.3064  
 42.1403  
 41.7051  
 23.4004

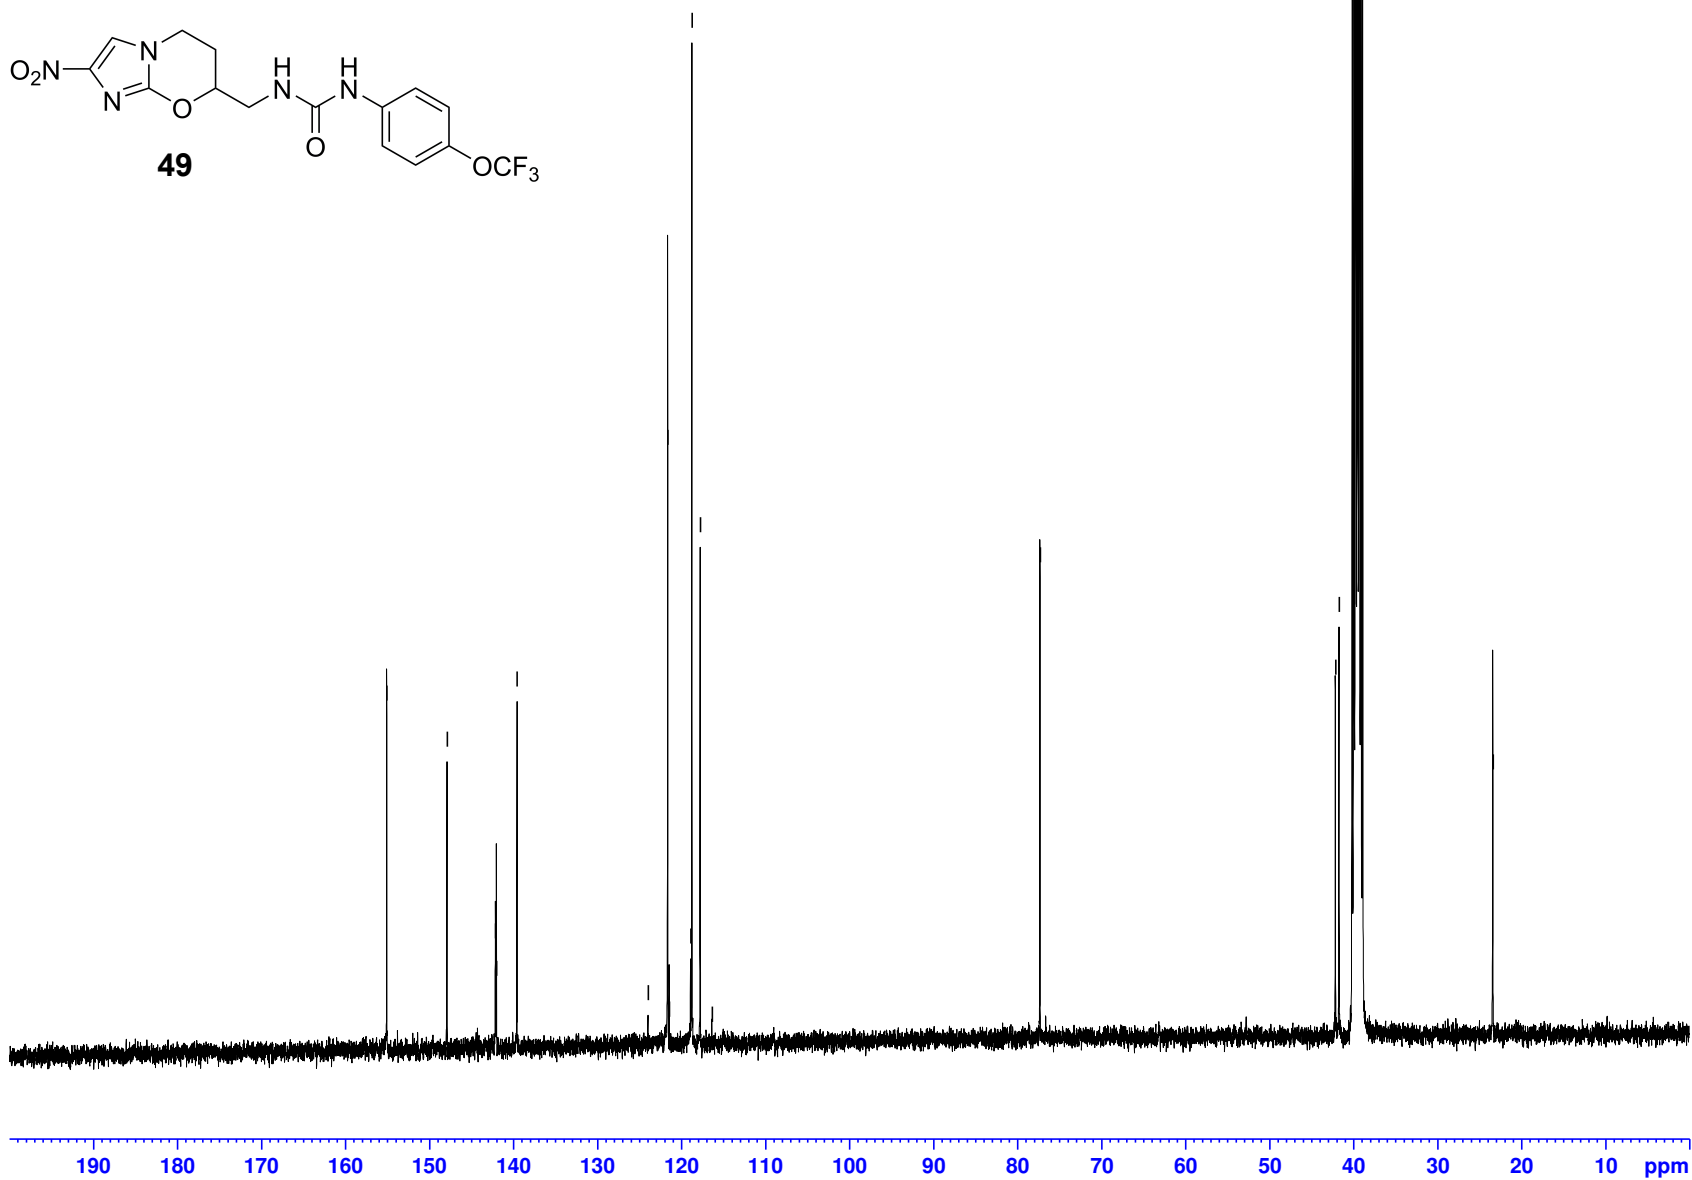

Current Data Parameters  
 NAME Jan25-2017  
 EXPNO 21  
 PROCNO 1

F2 - Acquisition Parameters  
 Date\_ 20170126  
 Time 8.42 h  
 INSTRUM spect  
 PROBHD Z108618\_0860 ( )  
 PULPROG zgpg50  
 TD 65536  
 SOLVENT DMSO  
 NS 14000  
 DS 4  
 SWH 24038.461 Hz  
 FIDRES 0.733596 Hz  
 AQ 1.3631488 sec  
 RG 198.55  
 DW 20.800 usec  
 DE 6.50 usec  
 TE 298.0 K  
 D1 0.63999999 sec  
 D11 0.03000000 sec  
 TD0 1  
 SFO1 100.6228298 MHz  
 NUC1 13C  
 P1 10.00 usec  
 PLW1 48.17399979 W  
 SFO2 400.1316005 MHz  
 NUC2 1H  
 CPDPRG[2] waltz16  
 PCPD2 90.00 usec  
 PLW2 13.19999981 W  
 PLW12 0.30142000 W  
 PLW13 0.15161000 W

F2 - Processing parameters  
 SI 32768  
 SF 100.6128174 MHz  
 WDW EM  
 SSB 0  
 LB 1.00 Hz  
 GB 0  
 PC 1.40

51 (in D<sub>6</sub>-DMSO)

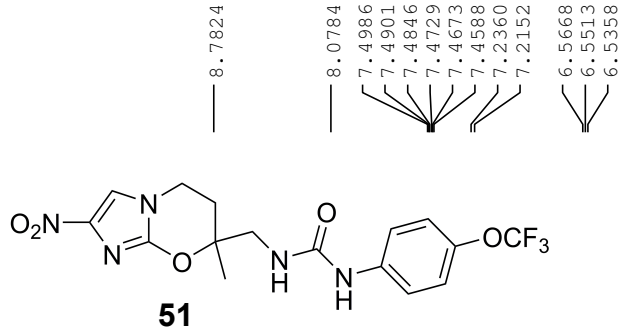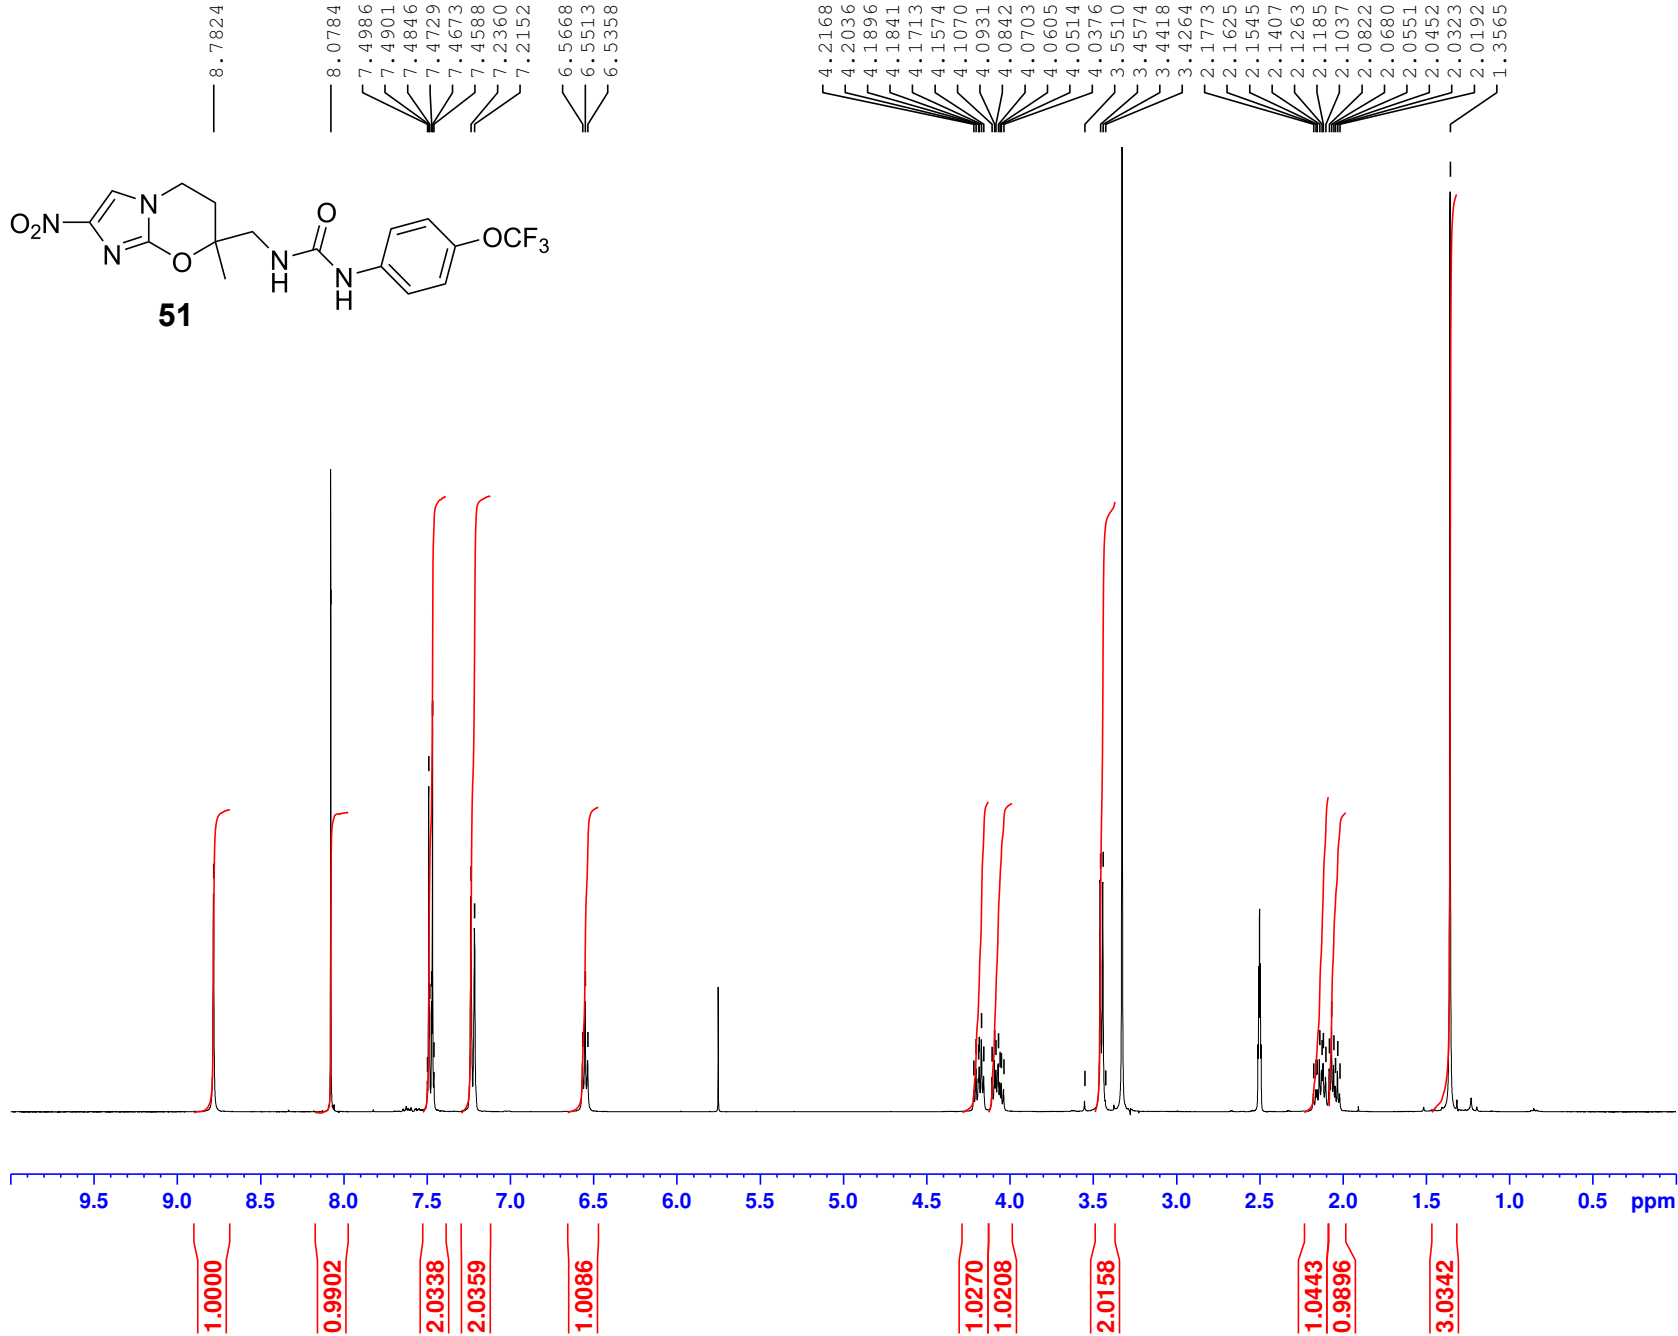

Current Data Parameters  
 NAME Aug07-2015-FMHSacsr  
 EXPNO 48  
 PROCNO 1

F2 - Acquisition Parameters  
 Date\_ 20150809  
 Time 19.58 h  
 INSTRUM spect  
 PROBHD 5 mm BBO BB-1H  
 PULPROG zg30  
 TD 65536  
 SOLVENT DMSO  
 NS 64  
 DS 2  
 SWH 8389.262 Hz  
 FIDRES 0.256020 Hz  
 AQ 3.9059455 sec  
 RG 161.3  
 DW 59.600 usec  
 DE 10.00 usec  
 TE 298.0 K  
 D1 2.00000000 sec  
 TD0 1  
 SFO1 400.1334011 MHz  
 NUC1 1H  
 P1 11.00 usec

F2 - Processing parameters  
 SI 32768  
 SF 400.1300024 MHz  
 WDW EM  
 SSB 0  
 LB 0.30 Hz  
 GB 0  
 PC 1.00

51 (in D<sub>6</sub>-DMSO)

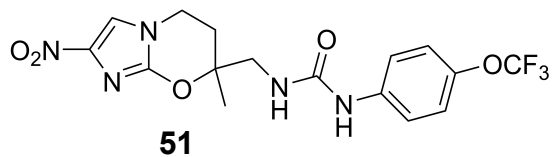

155.2004  
 147.2359  
 142.2239  
 142.1545  
 142.1388  
 139.5484  
 131.5225  
 128.8054  
 123.9870  
 121.6529  
 121.4528  
 118.9157  
 118.6997  
 117.7389  
 116.3803

81.9515

46.0853

27.1541

21.4678

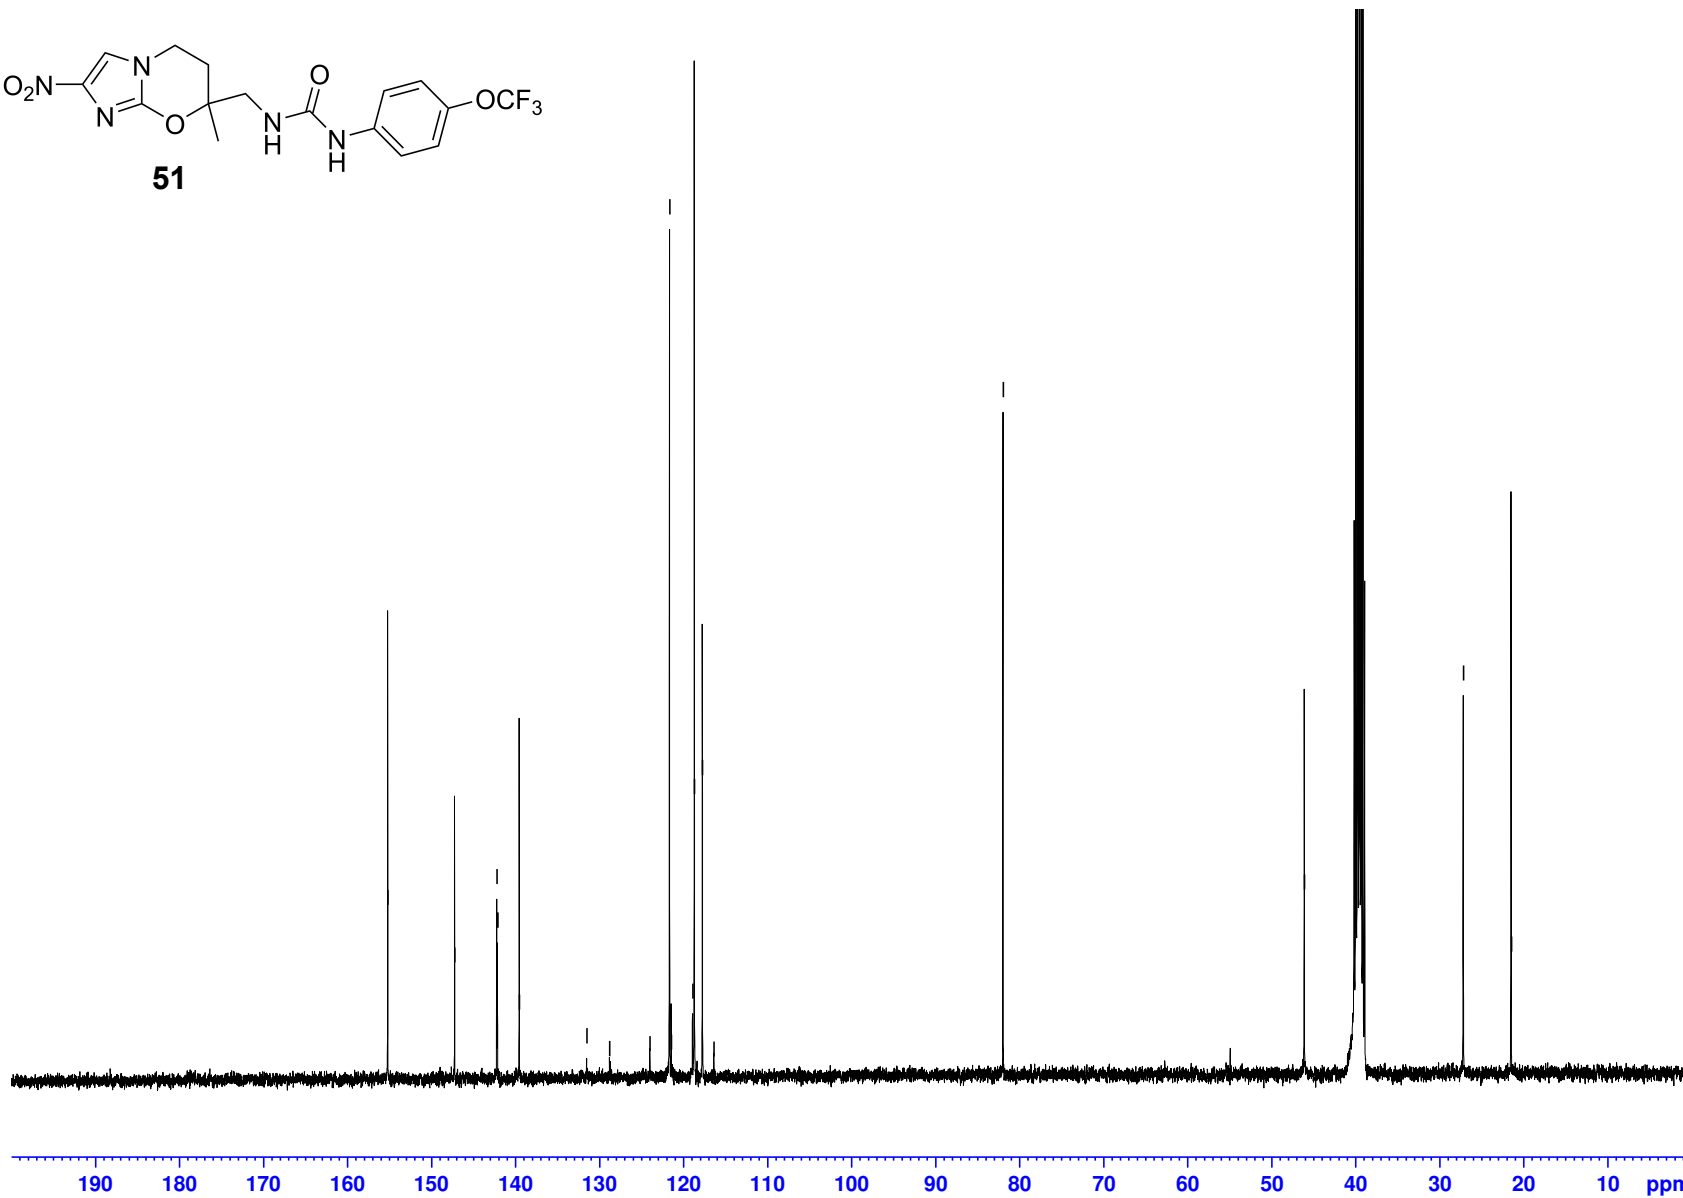

Current Data Parameters  
 NAME Aug07-2015-FMHSacsrcnmr  
 EXPNO 4  
 PROCNO 1

F2 - Acquisition Parameters

Date\_ 20150810  
 Time 1.10 h  
 INSTRUM spect  
 PROBHD 5 mm BBO BB-1H  
 PULPROG zgpg50  
 TD 65536  
 SOLVENT DMSO  
 NS 9000  
 DS 4  
 SWH 26178.010 Hz  
 FIDRES 0.798889 Hz  
 AQ 1.2517376 sec  
 RG 11585.2  
 DW 19.100 usec  
 DE 10.00 usec  
 TE 298.0 K  
 D1 0.75000000 sec  
 d11 0.03000000 sec  
 DELTA 0.64999998 sec  
 TD0 1  
 SFO1 100.6248425 MHz  
 NUC1 13C  
 P1 11.80 usec  
 SFO2 400.1316005 MHz  
 NUC2 1H  
 CPDPRG[2] waltz16  
 PCPD2 100.00 usec

F2 - Processing parameters

SI 32768  
 SF 100.6128164 MHz  
 WDW EM  
 SSB 0  
 LB 1.00 Hz  
 GB 0  
 PC 1.40

55 (in D<sub>6</sub>-DMSO)

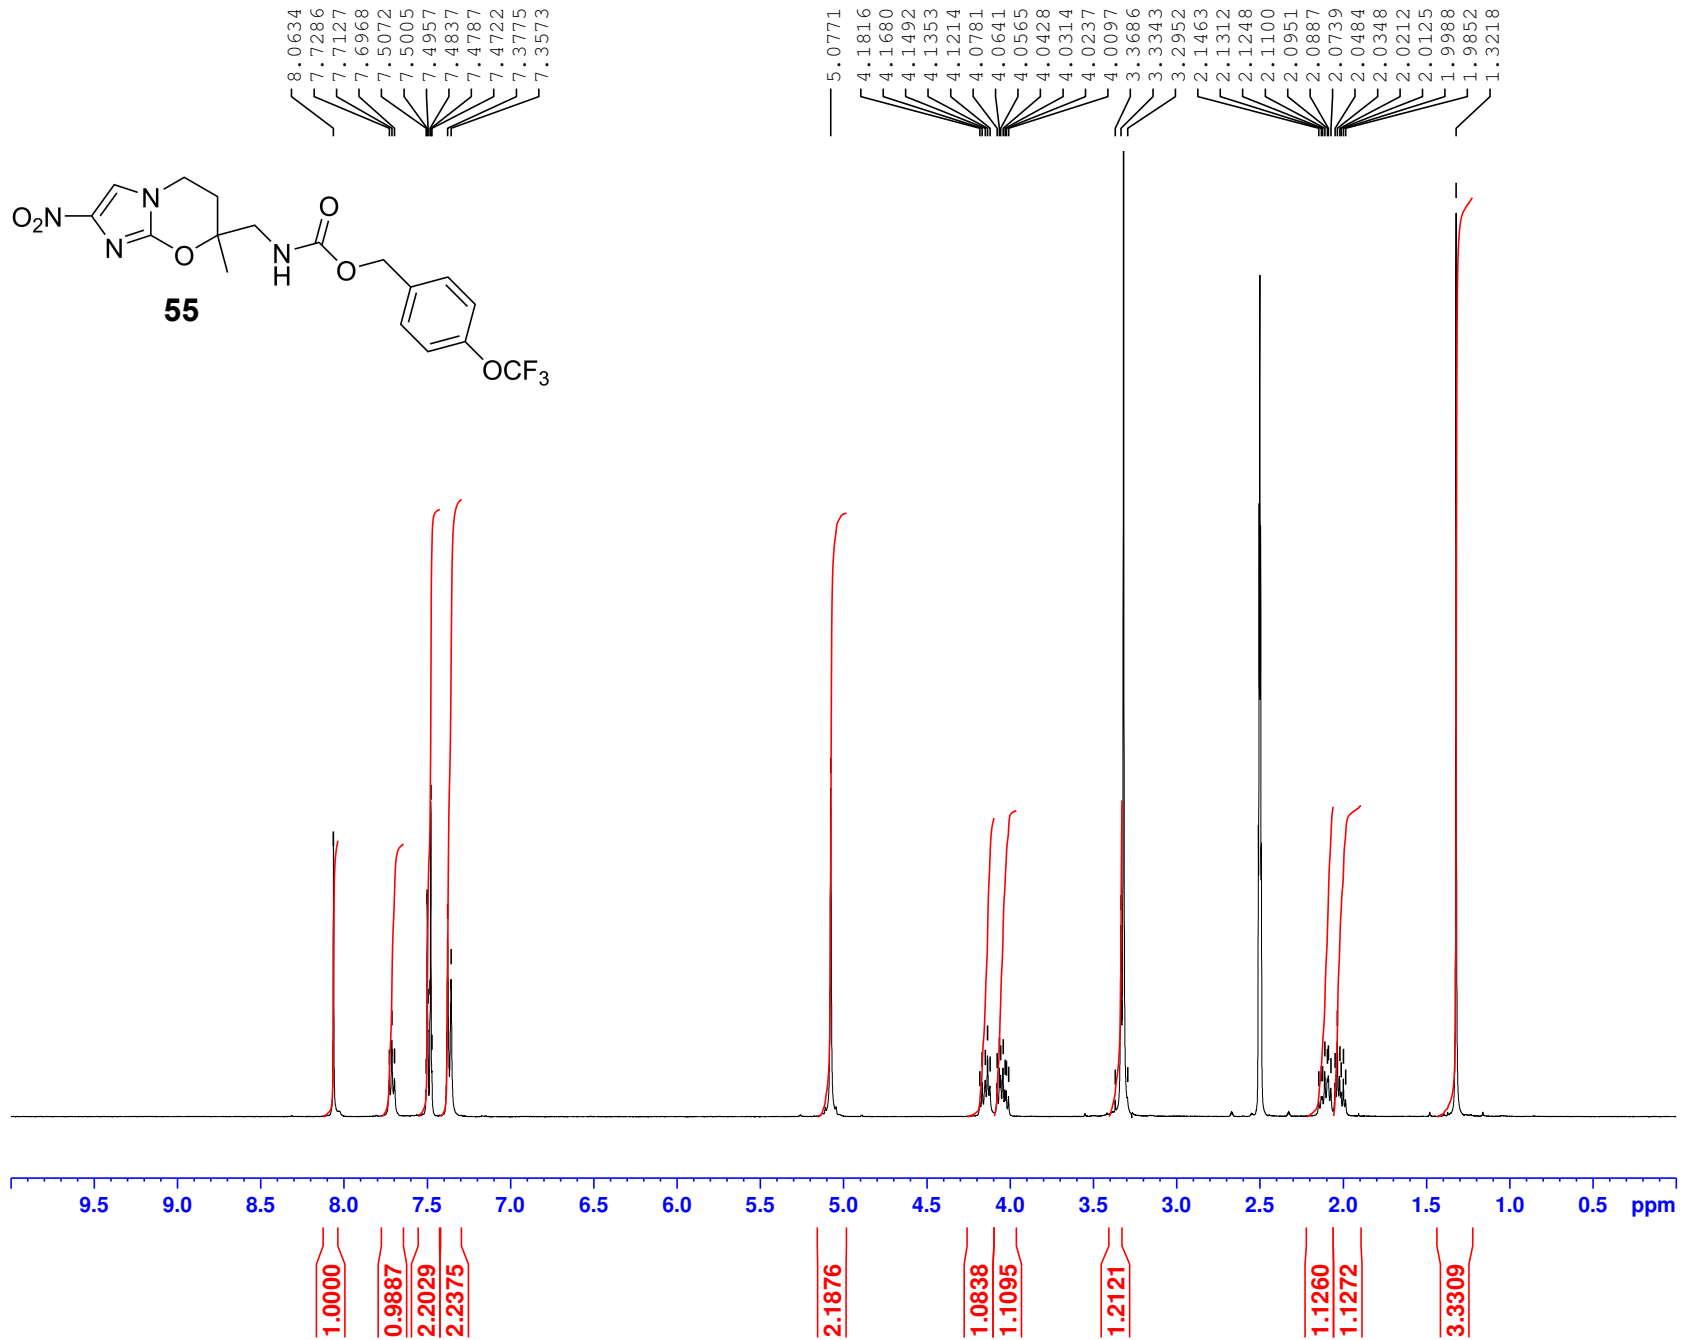

Current Data Parameters  
 NAME Jun12-2020  
 EXPNO 11  
 PROCNO 1

F2 - Acquisition Parameters  
 Date\_ 20200612  
 Time 23.20 h  
 INSTRUM spect  
 PROBHD Z108618\_0860 (  
 PULPROG zg30  
 TD 65536  
 SOLVENT DMSO  
 NS 64  
 DS 2  
 SWH 8012.820 Hz  
 FIDRES 0.244532 Hz  
 AQ 4.0894465 sec  
 RG 198.55  
 DW 62.400 usec  
 DE 6.50 usec  
 TE 298.0 K  
 D1 1.00000000 sec  
 TD0 1  
 SFO1 400.1324708 MHz  
 NUC1 1H  
 P0 4.53 usec  
 P1 13.60 usec  
 PLW1 13.19999981 W

F2 - Processing parameters  
 SI 65536  
 SF 400.1300026 MHz  
 WDW EM  
 SSB 0  
 LB 0.30 Hz  
 GB 0  
 PC 1.00

55 (in D<sub>6</sub>-DMSO)

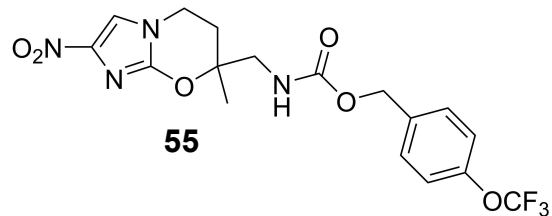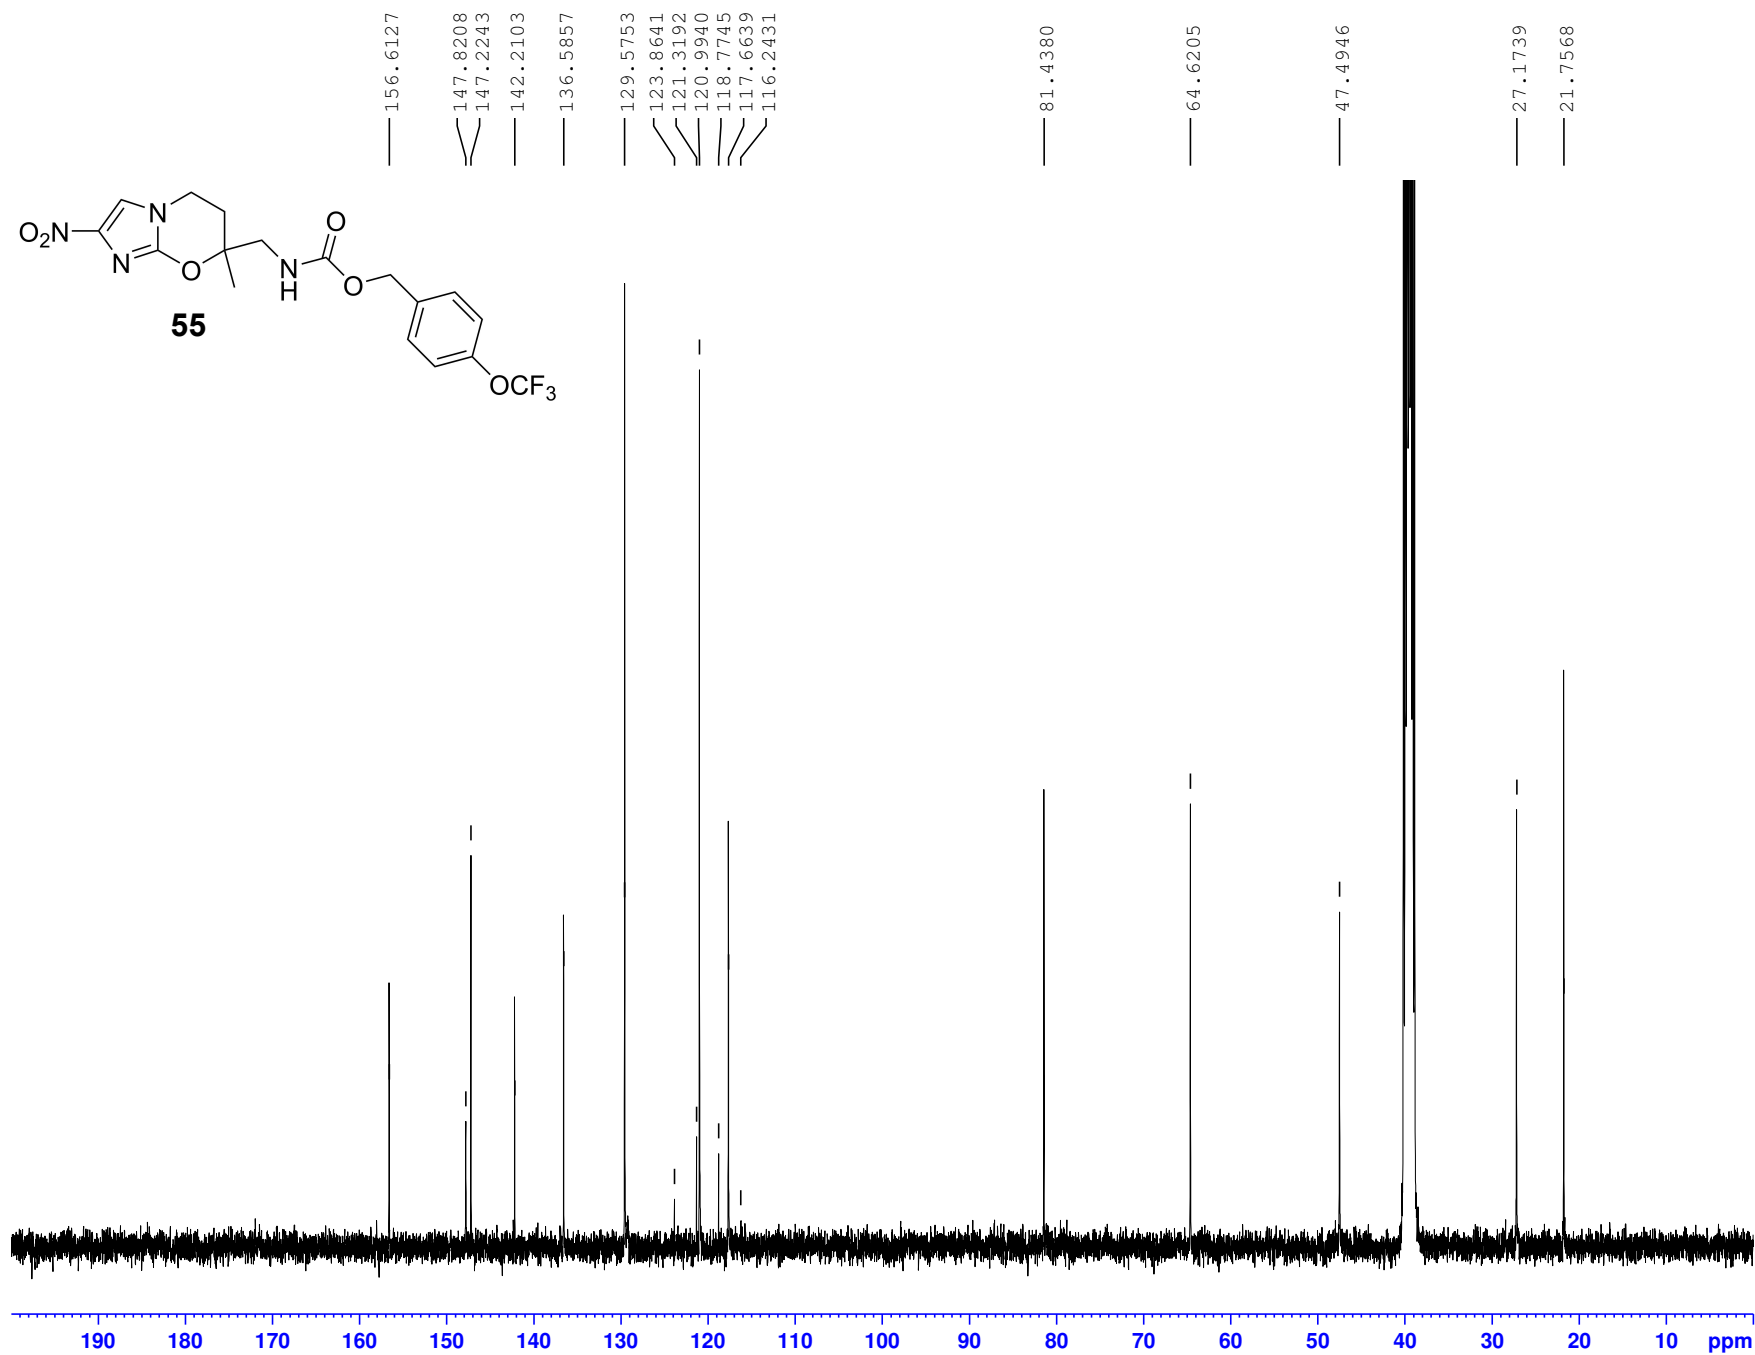

Current Data Parameters  
NAME Jun12-2020  
EXPNO 12  
PROCNO 1

F2 - Acquisition Parameters  
Date\_ 20200613  
Time 9.41 h  
INSTRUM spect  
PROBHD Z108618\_0860 ( )  
PULPROG zgpg50  
TD 65536  
SOLVENT DMSO  
NS 18000  
DS 4  
SWH 24038.461 Hz  
FIDRES 0.733596 Hz  
AQ 1.3631488 sec  
RG 198.55  
DW 20.800 usec  
DE 6.50 usec  
TE 298.0 K  
D1 0.63999999 sec  
D11 0.03000000 sec  
TD0 1  
SF01 100.6228298 MHz  
NUC1 13C  
P1 10.00 usec  
PLW1 48.17399979 W  
SFO2 400.1316005 MHz  
NUC2 1H  
CPDPRG[2] waltz16  
PCPD2 90.00 usec  
PLW2 13.19999981 W  
PLW12 0.30142000 W  
PLW13 0.15161000 W

F2 - Processing parameters  
SI 32768  
SF 100.6128174 MHz  
WDW EM  
SSB 0  
LB 1.00 Hz  
GB 0  
PC 1.40



57 (in D<sub>6</sub>-DMSO)

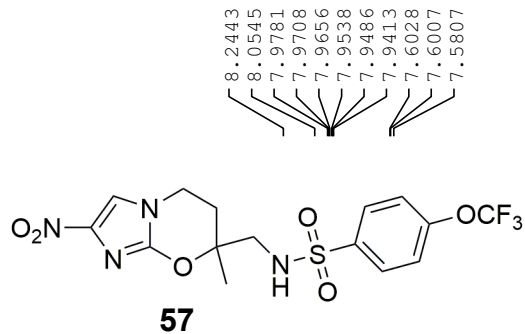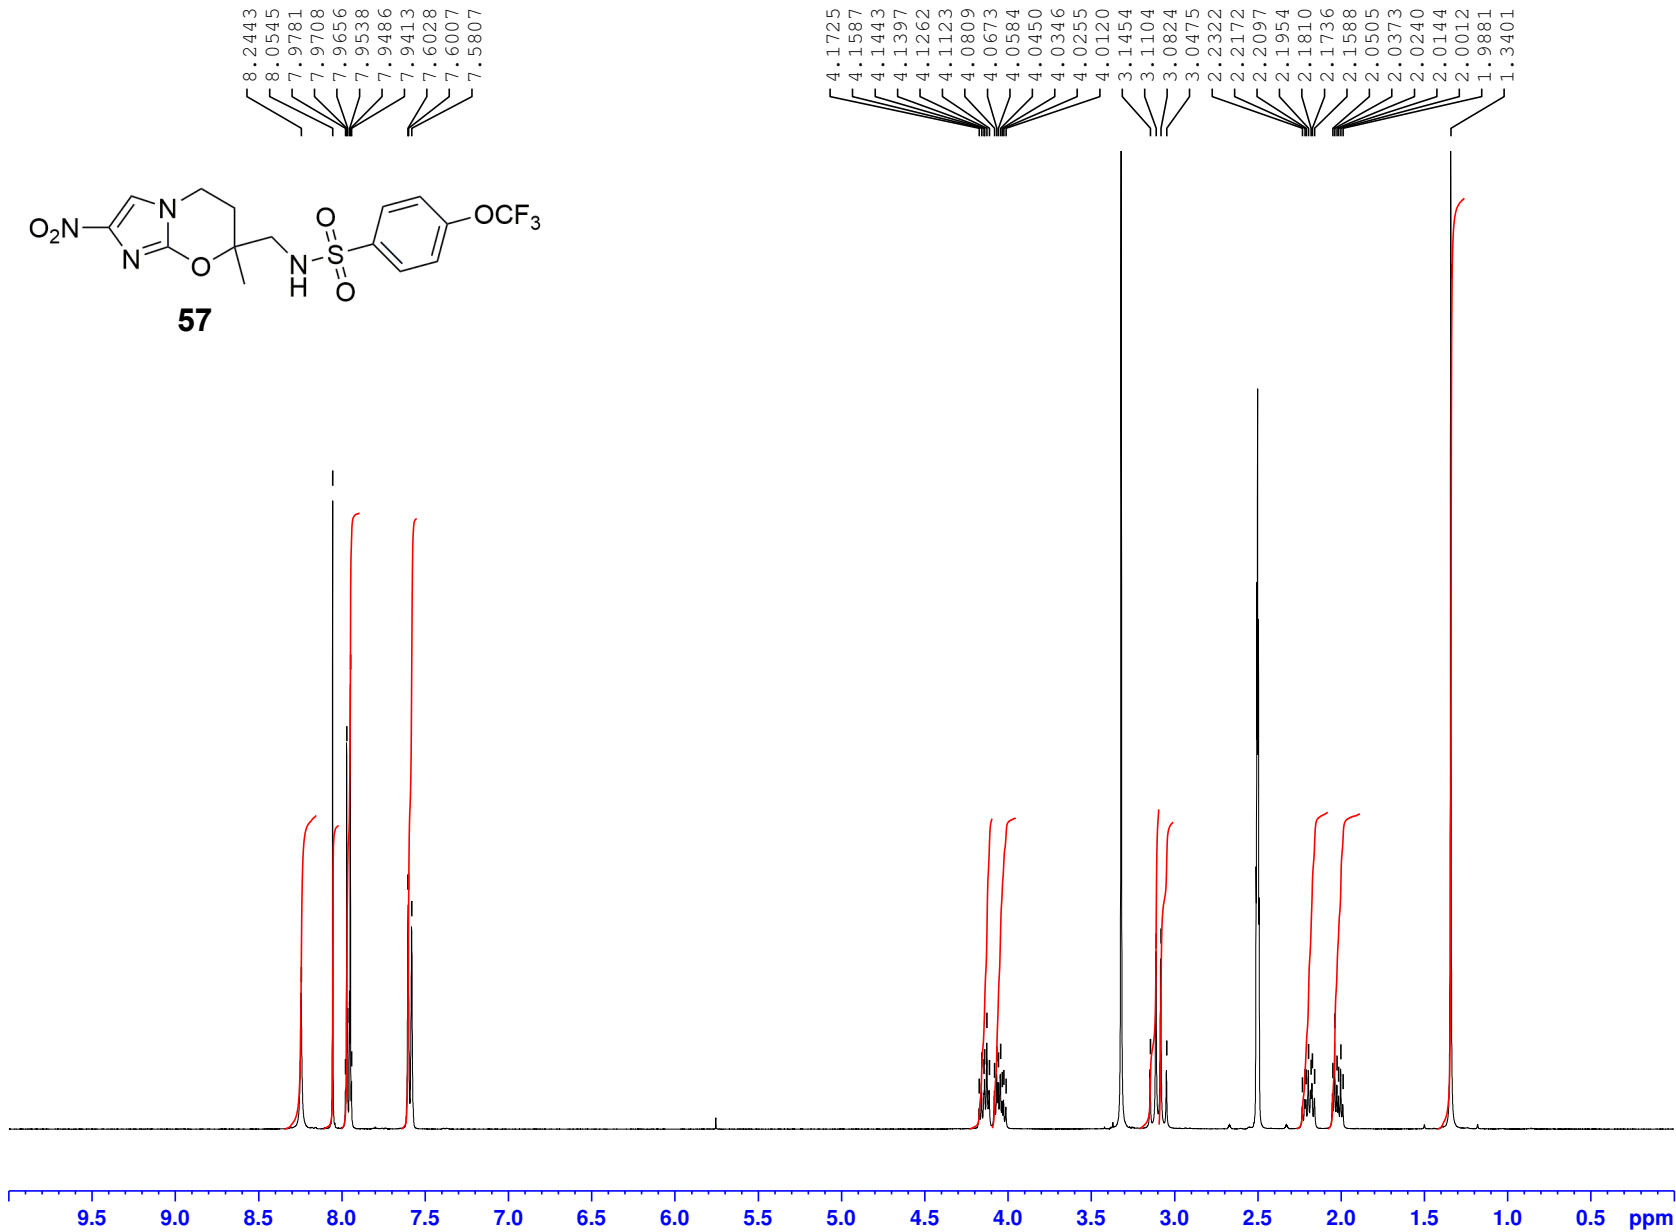

```

Current Data Parameters
NAME          Aug14-2019
EXPNO         15
PROCNO        1

F2 - Acquisition Parameters
Date_         20190814
Time          17.19 h
INSTRUM       spect
PROBHD        Z108618_0860 (
PULPROG       zg30
TD            65536
SOLVENT       DMSO
NS            64
DS            2
SWH           8012.820 Hz
FIDRES        0.244532 Hz
AQ            4.0894465 sec
RG            176.55
DW            62.400 usec
DE            6.50 usec
TE            298.0 K
D1            1.00000000 sec
TD0           1
SFO1          400.1324708 MHz
NUC1          1H
P0            4.53 usec
P1            13.60 usec
PLW1          13.19999981 W

F2 - Processing parameters
SI            65536
SF            400.1300026 MHz
WDW           EM
SSB           0
LB            0.30 Hz
GB            0
PC            1.00
    
```

57 (in D<sub>6</sub>-DMSO)

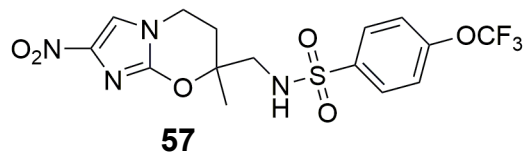

150.7613  
150.7456  
146.9778  
142.1753  
139.7497  
129.0521  
123.6948  
121.4687  
121.1336  
118.5687  
117.6904  
116.0192

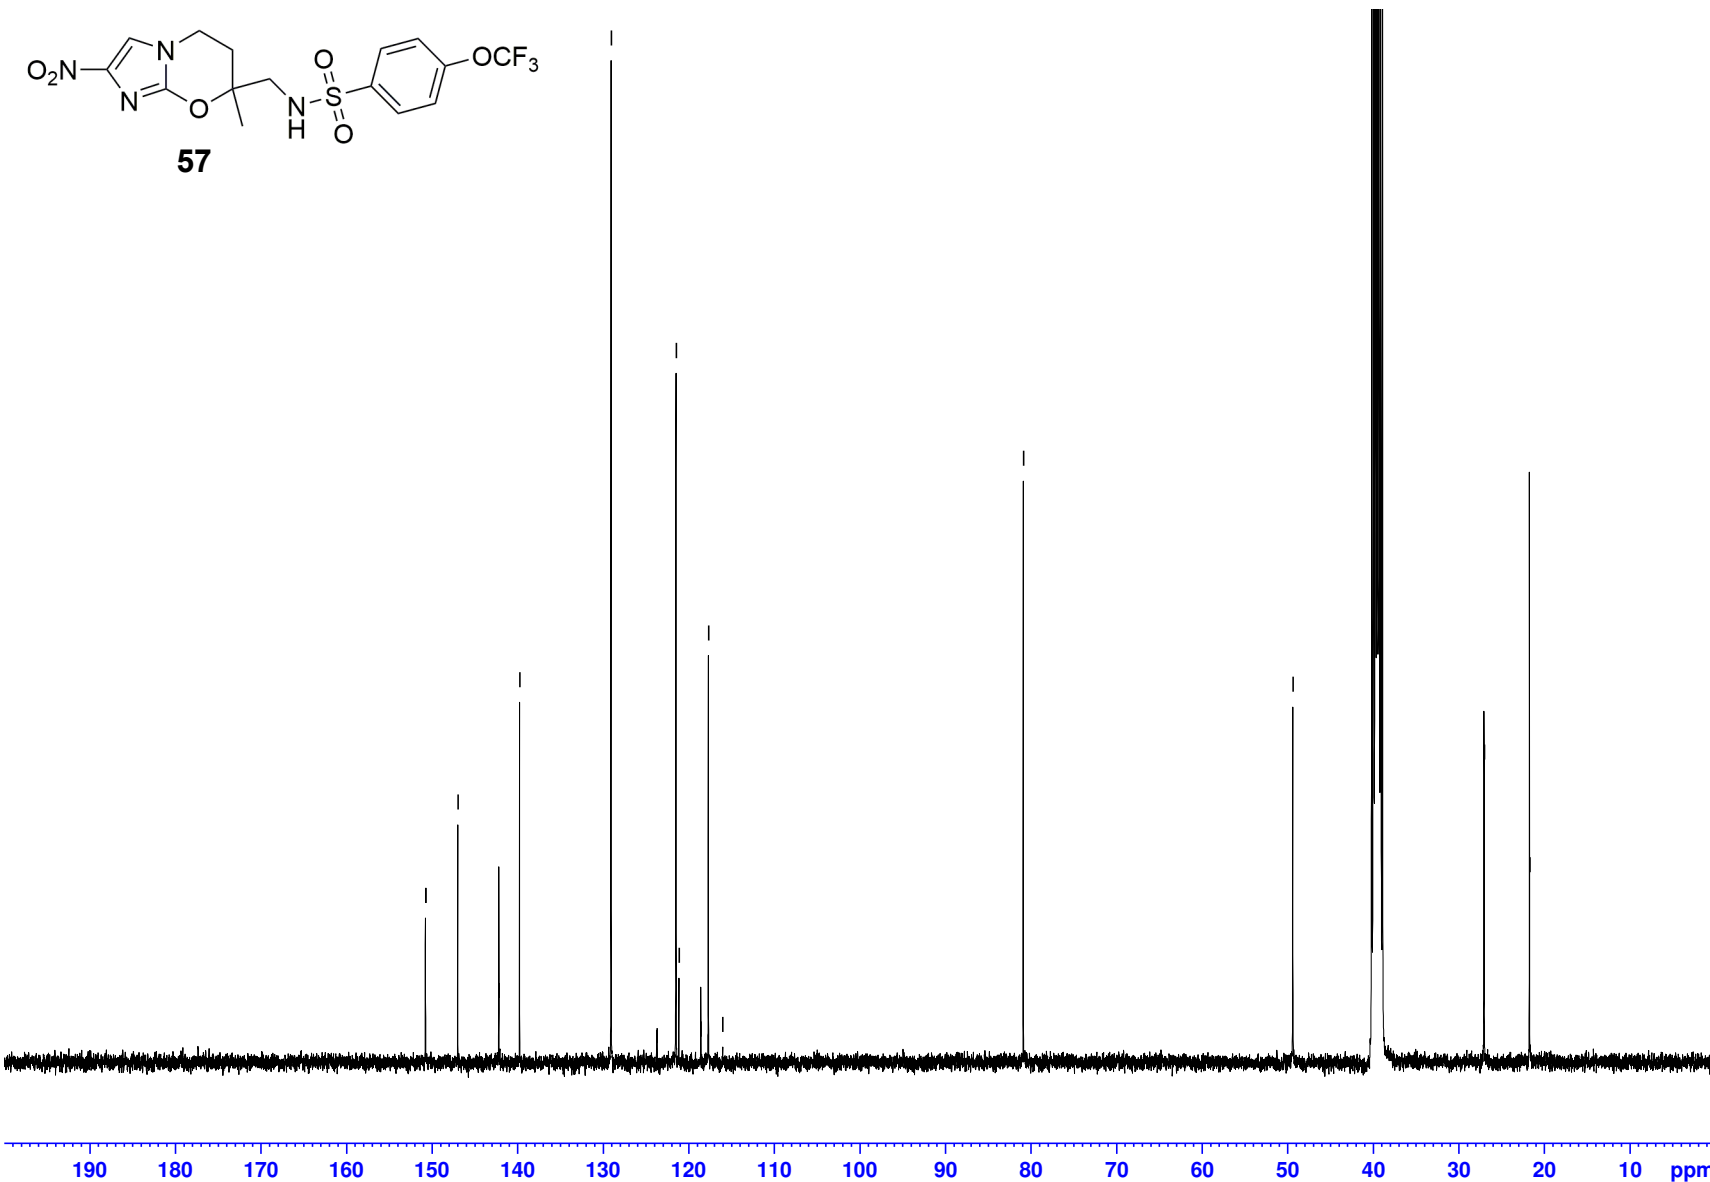

Current Data Parameters  
 NAME Aug14-2019  
 EXPNO 16  
 PROCNO 1

F2 - Acquisition Parameters  
 Date\_ 20190815  
 Time 4.49 h  
 INSTRUM spect  
 PROBHD Z108618\_0860 ( )  
 PULPROG zgpg50  
 TD 65536  
 SOLVENT DMSO  
 NS 20000  
 DS 4  
 SWH 24038.461 Hz  
 FIDRES 0.733596 Hz  
 AQ 1.3631488 sec  
 RG 198.55  
 DW 20.800 usec  
 DE 6.50 usec  
 TE 298.0 K  
 D1 0.63999999 sec  
 D11 0.03000000 sec  
 TD0 1  
 SFO1 100.6228298 MHz  
 NUC1 13C  
 P1 10.00 usec  
 PLW1 48.17399979 W  
 SFO2 400.1316005 MHz  
 NUC2 1H  
 CPDPRG2 waltz16  
 PCPD2 90.00 usec  
 PLW2 13.19999981 W  
 PLW12 0.30142000 W  
 PLW13 0.15161000 W

F2 - Processing parameters  
 SI 32768  
 SF 100.6128176 MHz  
 WDW EM  
 SSB 0  
 LB 1.00 Hz  
 GB 0  
 PC 1.40

64 (in D<sub>6</sub>-DMSO)

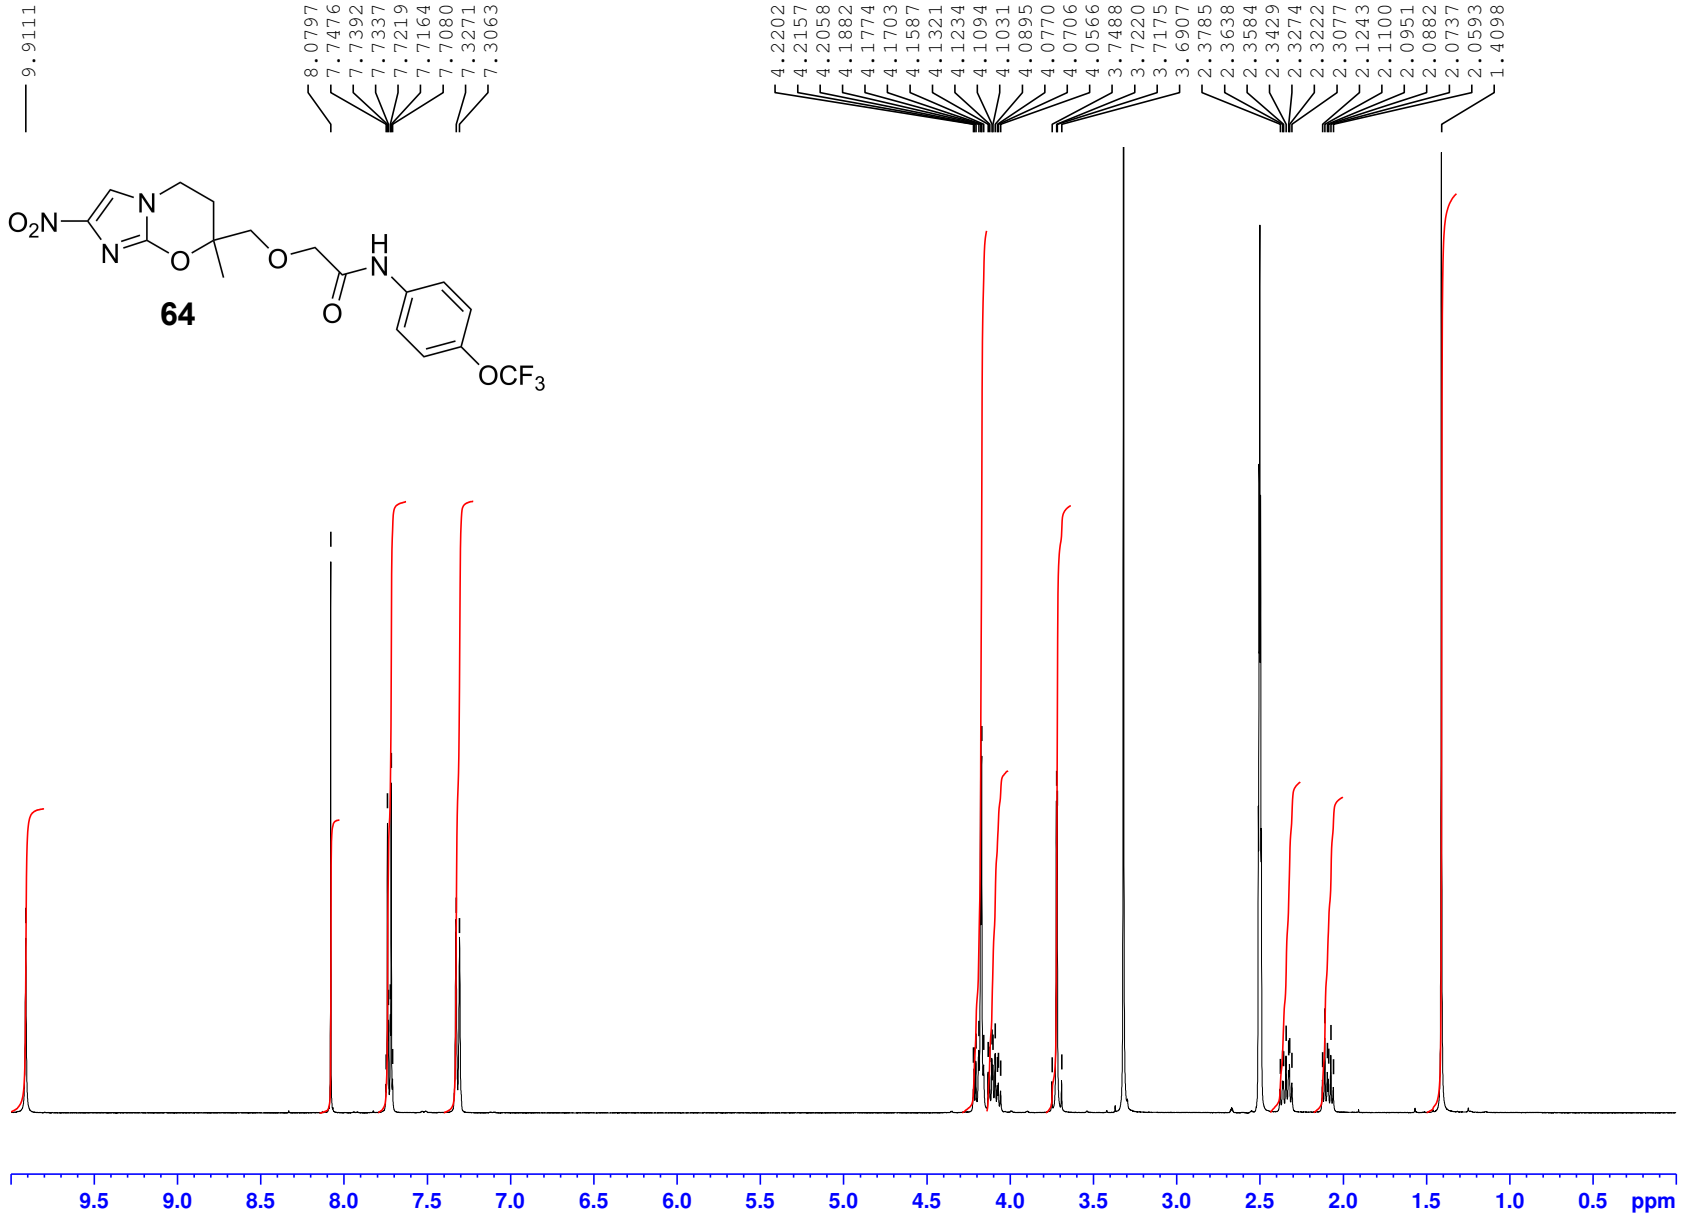

Current Data Parameters  
 NAME Jun19-2020  
 EXPNO 13  
 PROCNO 1

F2 - Acquisition Parameters  
 Date\_ 20200621  
 Time 6.22 h  
 INSTRUM spect  
 PROBHD Z108618\_0860 (  
 PULPROG zg30  
 TD 65536  
 SOLVENT DMSO  
 NS 64  
 DS 2  
 SWH 8012.820 Hz  
 FIDRES 0.244532 Hz  
 AQ 4.0894465 sec  
 RG 198.55  
 DW 62.400 usec  
 DE 6.50 usec  
 TE 298.0 K  
 D1 1.00000000 sec  
 TD0 1  
 SFO1 400.1324708 MHz  
 NUC1 1H  
 P0 4.53 usec  
 P1 13.60 usec  
 PLW1 13.19999981 W

F2 - Processing parameters  
 SI 65536  
 SF 400.1300026 MHz  
 WDW EM  
 SSB 0  
 LB 0.30 Hz  
 GB 0  
 PC 1.00

64 (in D<sub>6</sub>-DMSO)

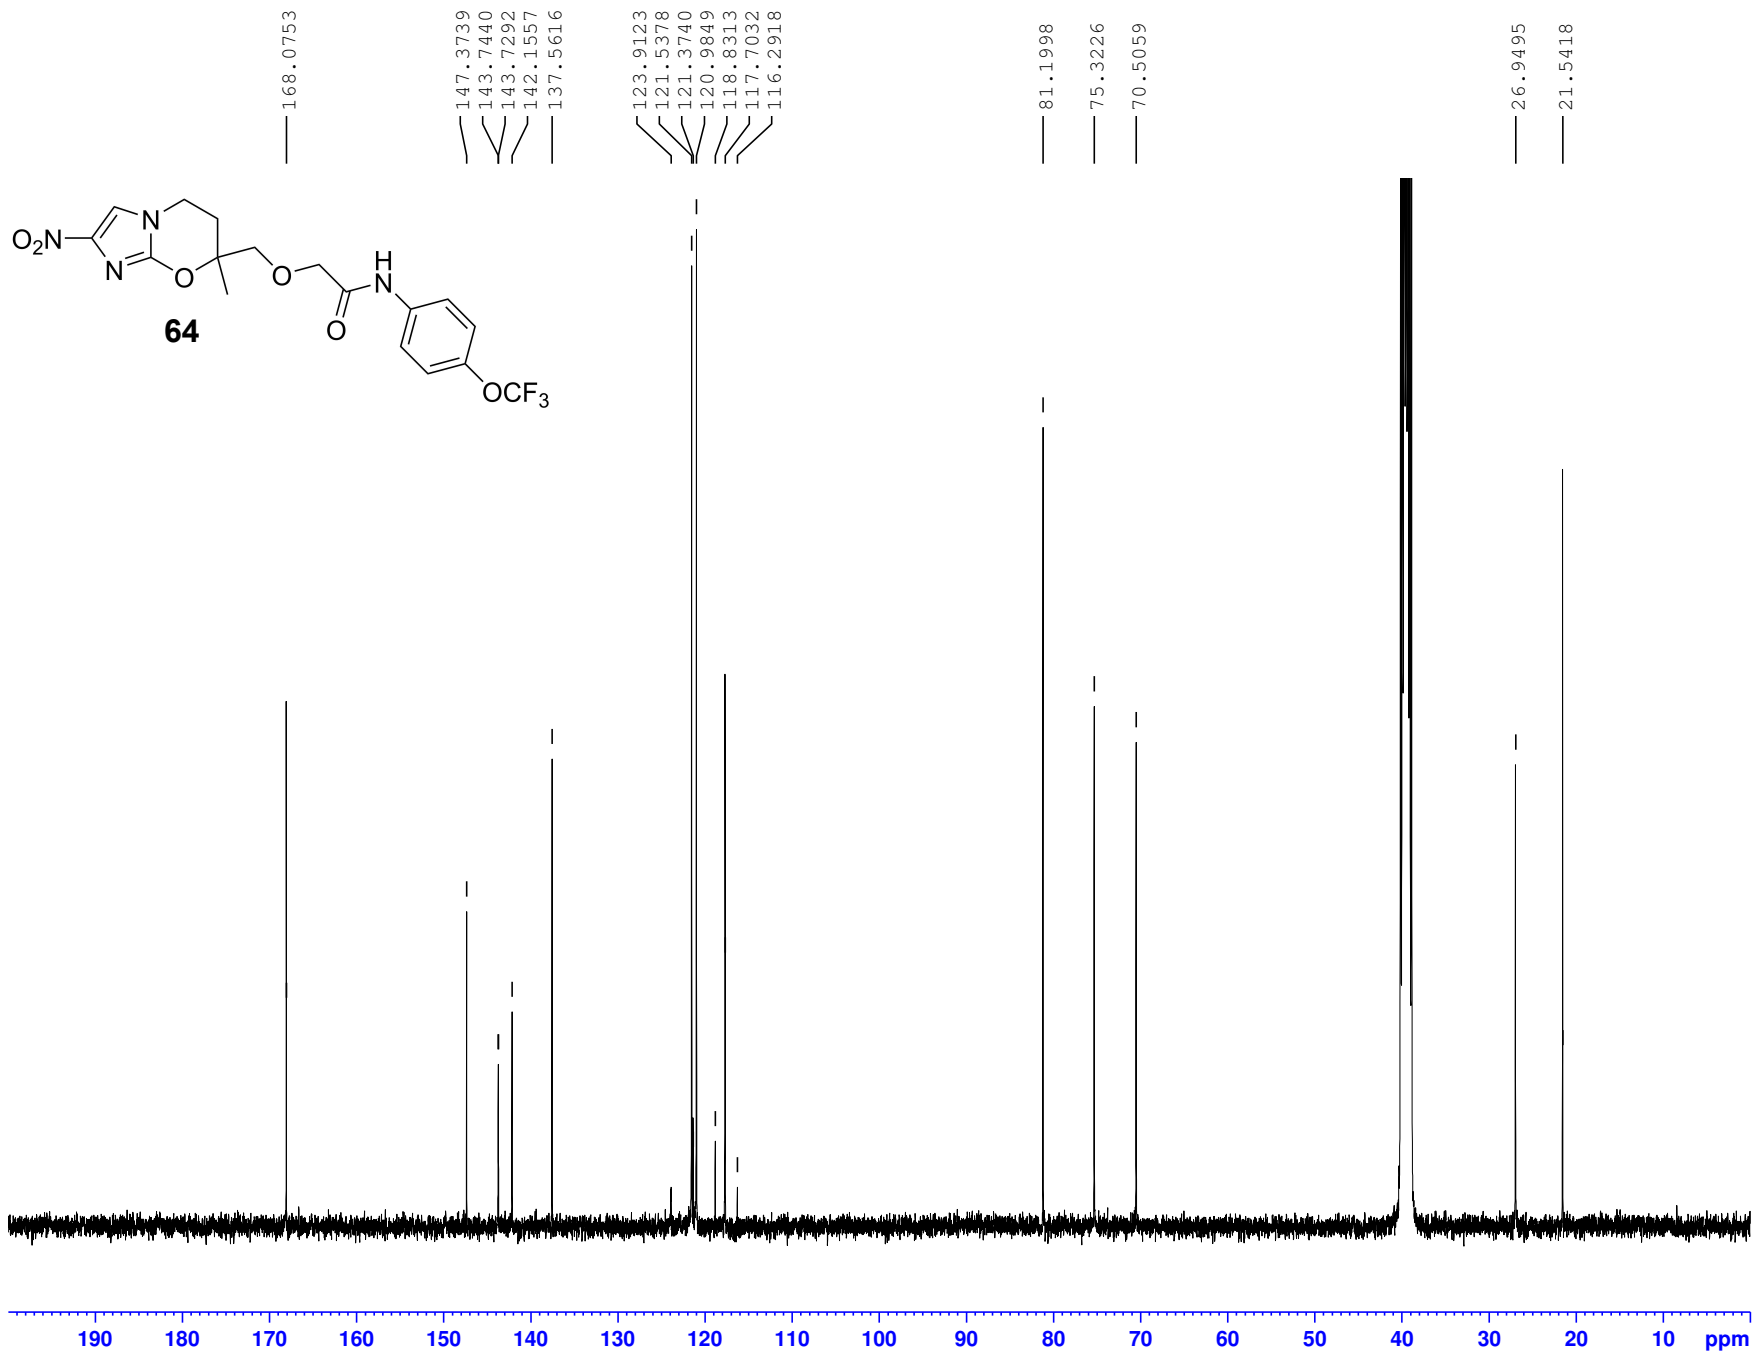

Current Data Parameters  
 NAME Jun19-2020  
 EXPNO 14  
 PROCNO 1

F2 - Acquisition Parameters  
 Date\_ 20200622  
 Time 5.20 h  
 INSTRUM spect  
 PROBHD Z108618\_0860 ( )  
 PULPROG zgpg50  
 TD 65536  
 SOLVENT DMSO  
 NS 40000  
 DS 4  
 SWH 24038.461 Hz  
 FIDRES 0.733596 Hz  
 AQ 1.3631488 sec  
 RG 198.55  
 DW 20.800 usec  
 DE 6.50 usec  
 TE 298.0 K  
 D1 0.63999999 sec  
 D11 0.03000000 sec  
 TD0 1  
 SFO1 100.6228298 MHz  
 NUC1 13C  
 P1 10.00 usec  
 PLW1 48.17399979 W  
 SFO2 400.1316005 MHz  
 NUC2 1H  
 CPDPRG2 waltz16  
 PCPD2 90.00 usec  
 PLW2 13.19999981 W  
 PLW12 0.30142000 W  
 PLW13 0.15161000 W

F2 - Processing parameters  
 SI 32768  
 SF 100.6128177 MHz  
 WDW EM  
 SSB 0  
 LB 1.00 Hz  
 GB 0  
 PC 1.40

65 (in D<sub>6</sub>-DMSO)

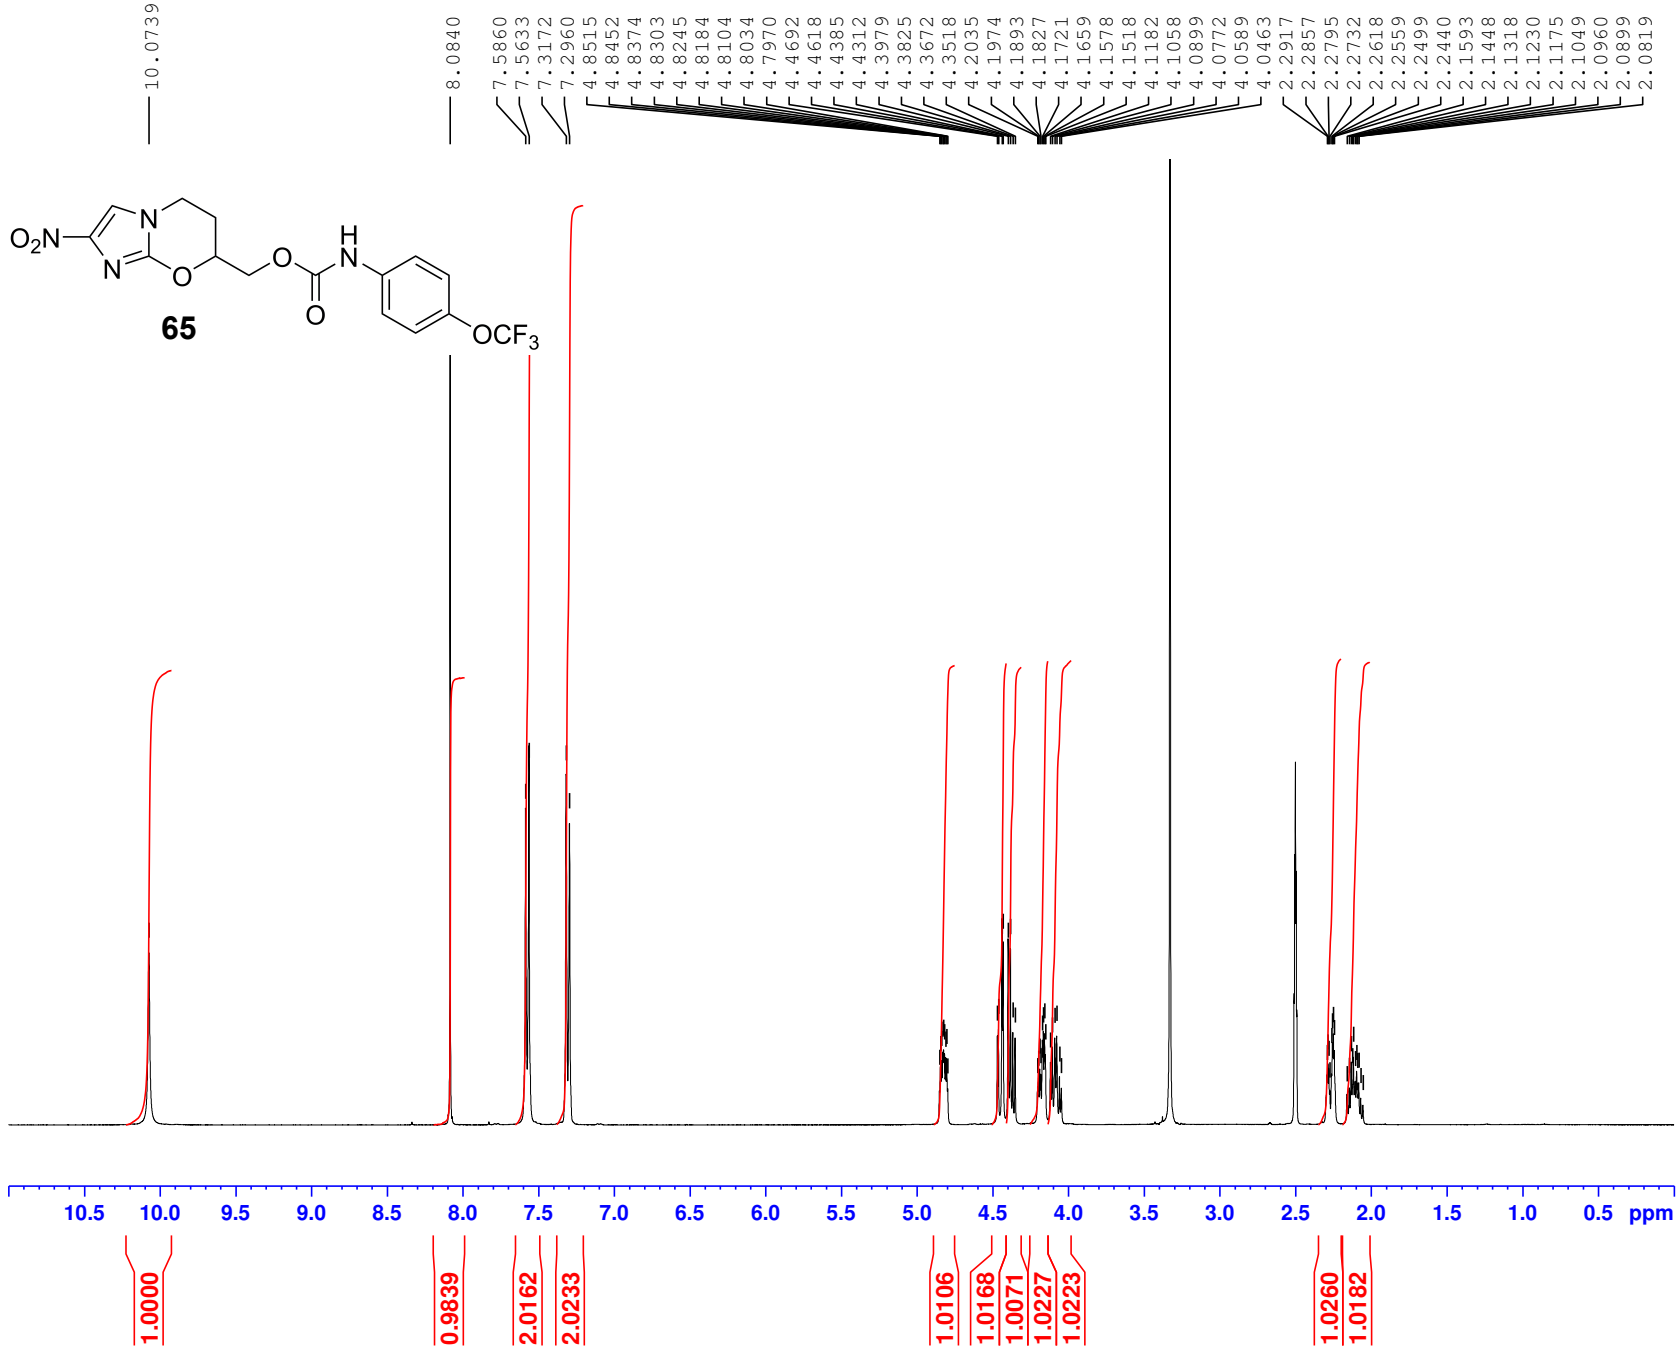

Current Data Parameters  
 NAME Jan12-2016  
 EXPNO 10  
 PROCNO 1

F2 - Acquisition Parameters  
 Date\_ 20160112  
 Time 16.11 h  
 INSTRUM spect  
 PROBHD Z108618\_0860 (  
 PULPROG zg30  
 TD 65536  
 SOLVENT DMSO  
 NS 64  
 DS 2  
 SWH 8012.820 Hz  
 FIDRES 0.122266 Hz  
 AQ 4.0894465 sec  
 RG 176.55  
 DW 62.400 usec  
 DE 6.50 usec  
 TE 298.0 K  
 D1 1.00000000 sec  
 TD0 1  
 SFO1 400.1324708 MHz  
 NUC1 1H  
 P1 13.60 usec  
 PLW1 13.19999981 W

F2 - Processing parameters  
 SI 65536  
 SF 400.1300026 MHz  
 WDW EM  
 SSB 0  
 LB 0.30 Hz  
 GB 0  
 PC 1.00

65 (in D<sub>6</sub>-DMSO)

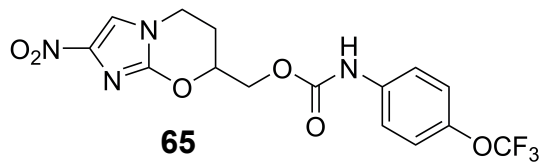

153.0901  
 147.6661  
 143.1798  
 143.1617  
 142.0575  
 138.1884  
 123.9444  
 121.7574  
 121.4040  
 119.4817  
 118.8654  
 117.7831  
 116.3270

75.9260  
 64.9095  
 41.6465  
 22.2635

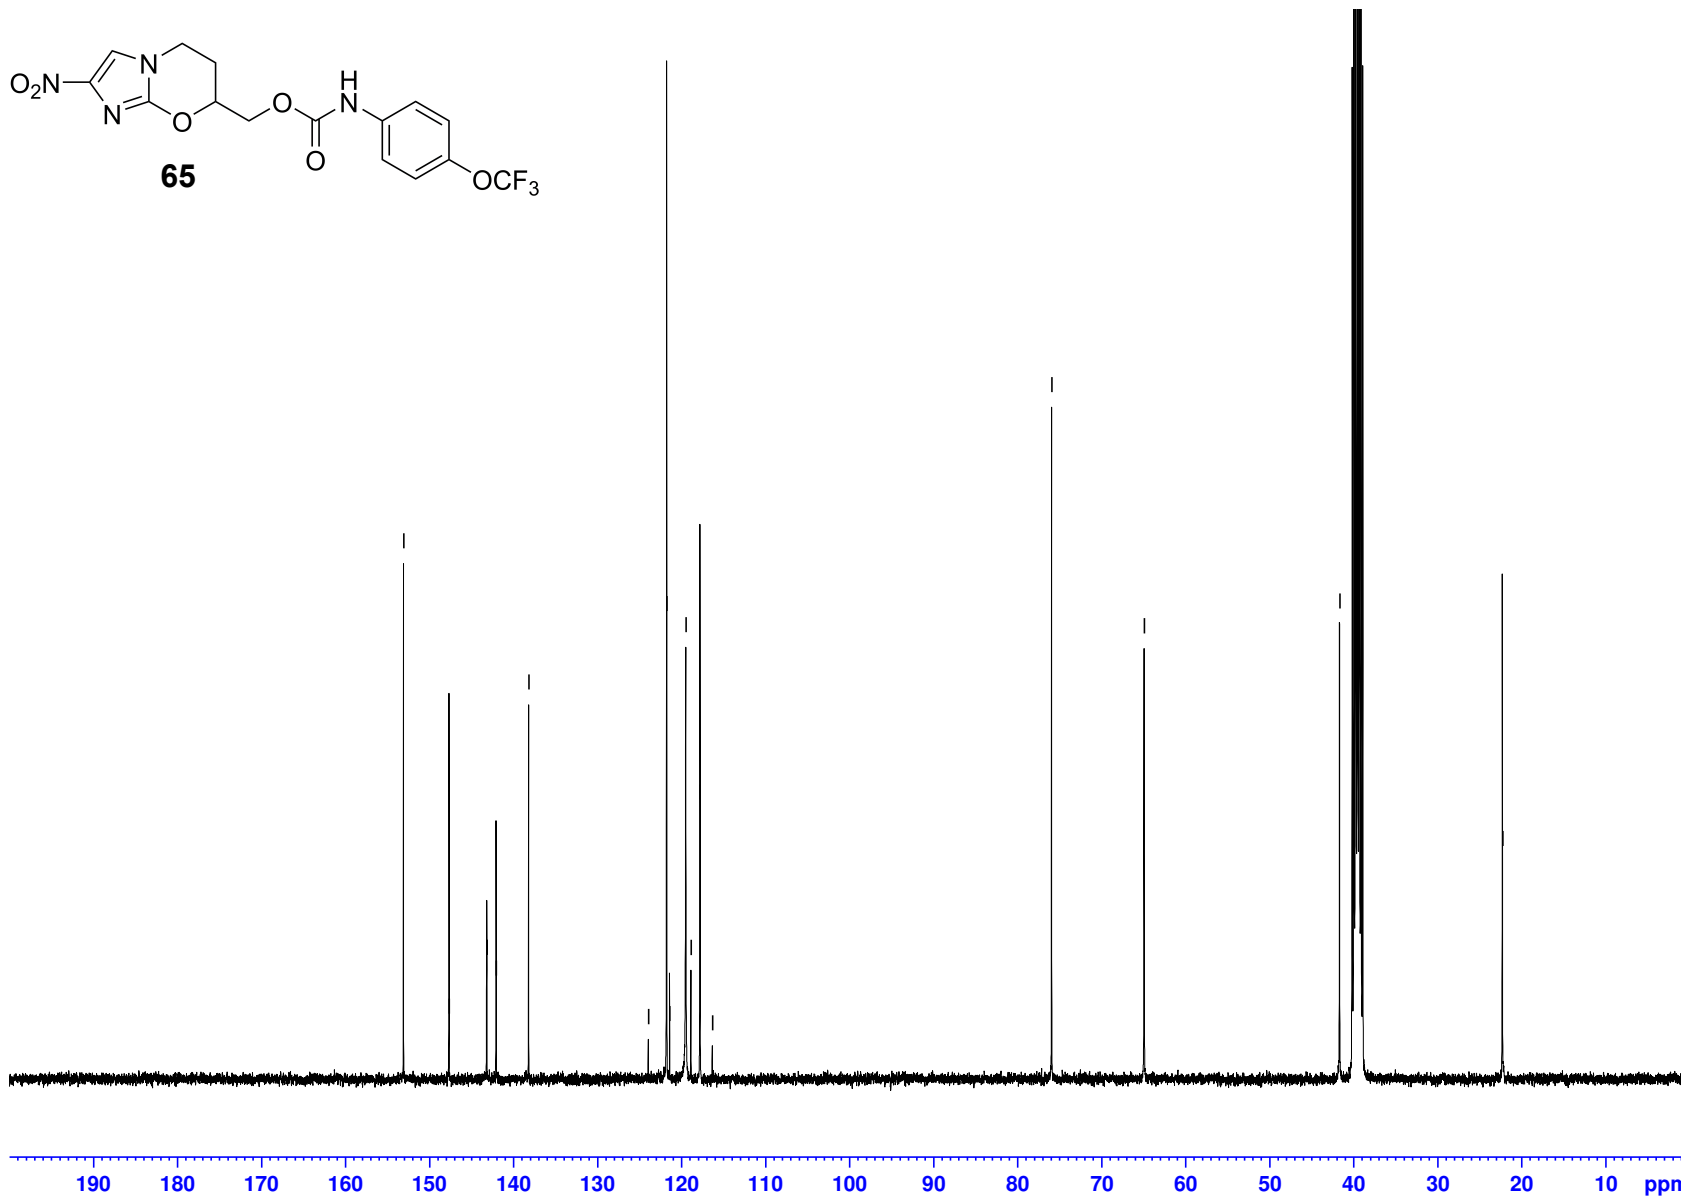

Current Data Parameters  
 NAME Jan12-2016  
 EXPNO 11  
 PROCNO 1

F2 - Acquisition Parameters  
 Date\_ 20160112  
 Time 23.06 h  
 INSTRUM spect  
 PROBHD Z108618\_0860 ( )  
 PULPROG zgpg50  
 TD 65536  
 SOLVENT DMSO  
 NS 12000  
 DS 4  
 SWH 24038.461 Hz  
 FIDRES 0.366798 Hz  
 AQ 1.3631488 sec  
 RG 198.55  
 DW 20.800 usec  
 DE 6.50 usec  
 TE 298.0 K  
 D1 0.63999999 sec  
 D11 0.03000000 sec  
 TD0 1  
 SFO1 100.6228298 MHz  
 NUC1 13C  
 P1 10.00 usec  
 PLW1 48.17399979 W  
 SFO2 400.1316005 MHz  
 NUC2 1H  
 CPDPRG[2] waltz16  
 PCPD2 90.00 usec  
 PLW2 13.19999981 W  
 PLW12 0.30142000 W  
 PLW13 0.15161000 W

F2 - Processing parameters  
 SI 32768  
 SF 100.6128164 MHz  
 WDW EM  
 SSB 0  
 LB 1.00 Hz  
 GB 0  
 PC 1.40

66 (in D<sub>6</sub>-DMSO)

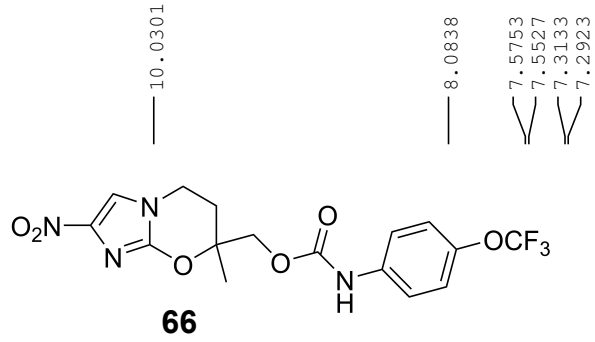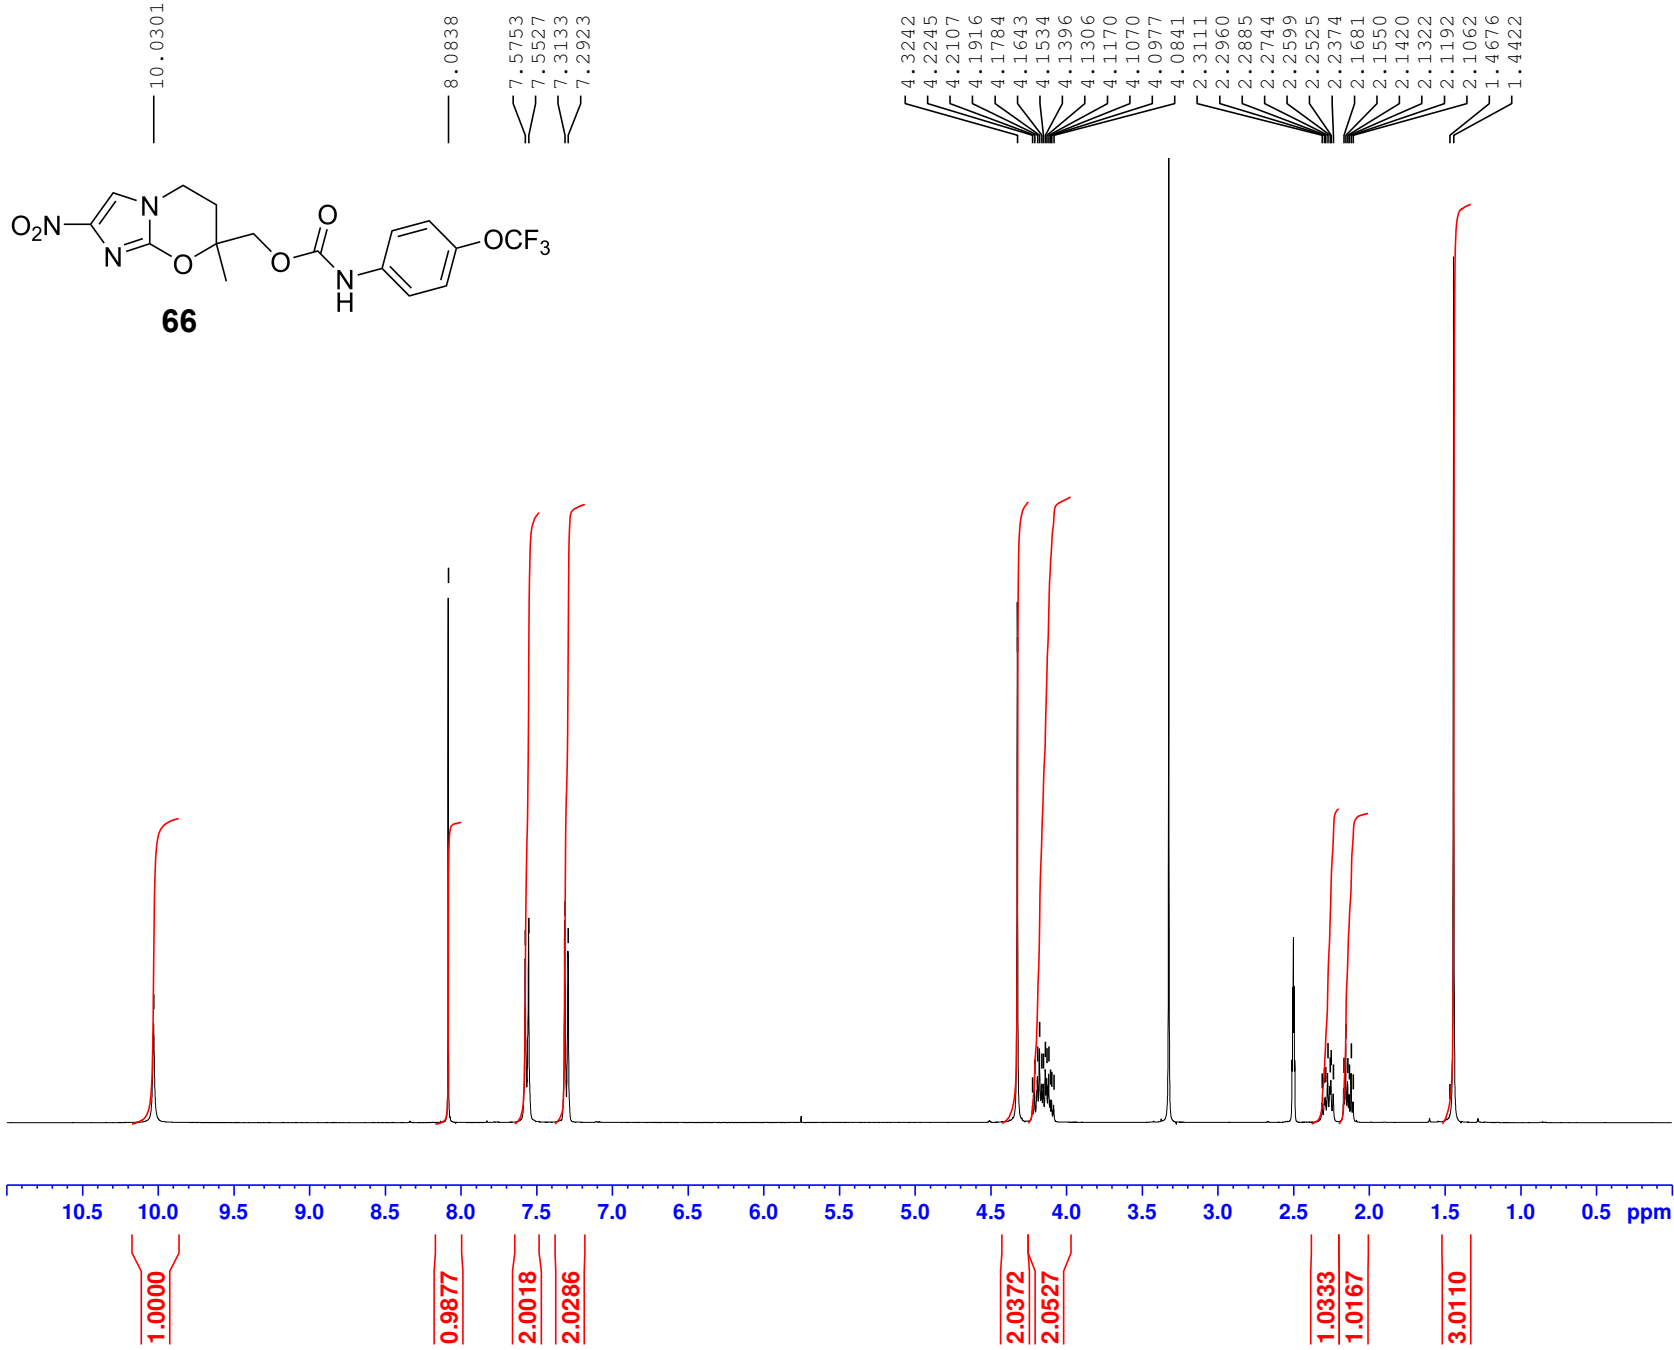

Current Data Parameters  
 NAME Aug07-2015-FMHSacsr  
 EXPNO 46  
 PROCNO 1

F2 - Acquisition Parameters  
 Date\_ 20150809  
 Time 14.36 h  
 INSTRUM spect  
 PROBHD 5 mm BBO BB-1H  
 PULPROG zg30  
 TD 65536  
 SOLVENT DMSO  
 NS 64  
 DS 2  
 SWH 8389.262 Hz  
 FIDRES 0.256020 Hz  
 AQ 3.9059455 sec  
 RG 228.1  
 DW 59.600 usec  
 DE 10.00 usec  
 TE 298.0 K  
 D1 2.0000000 sec  
 TD0 1  
 SFO1 400.1334011 MHz  
 NUC1 1H  
 P1 11.00 usec

F2 - Processing parameters  
 SI 32768  
 SF 400.130024 MHz  
 WDW EM  
 SSB 0  
 LB 0.30 Hz  
 GB 0  
 PC 1.00

66 (in D<sub>6</sub>-DMSO)

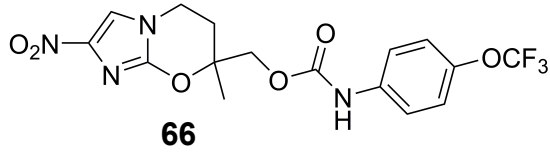

153.0118  
 147.0331  
 143.1685  
 142.2205  
 138.1476  
 123.9348  
 121.7443  
 121.3958  
 119.5012  
 118.8586  
 117.7712  
 116.3188

80.3969

67.7149

26.5717

20.6967

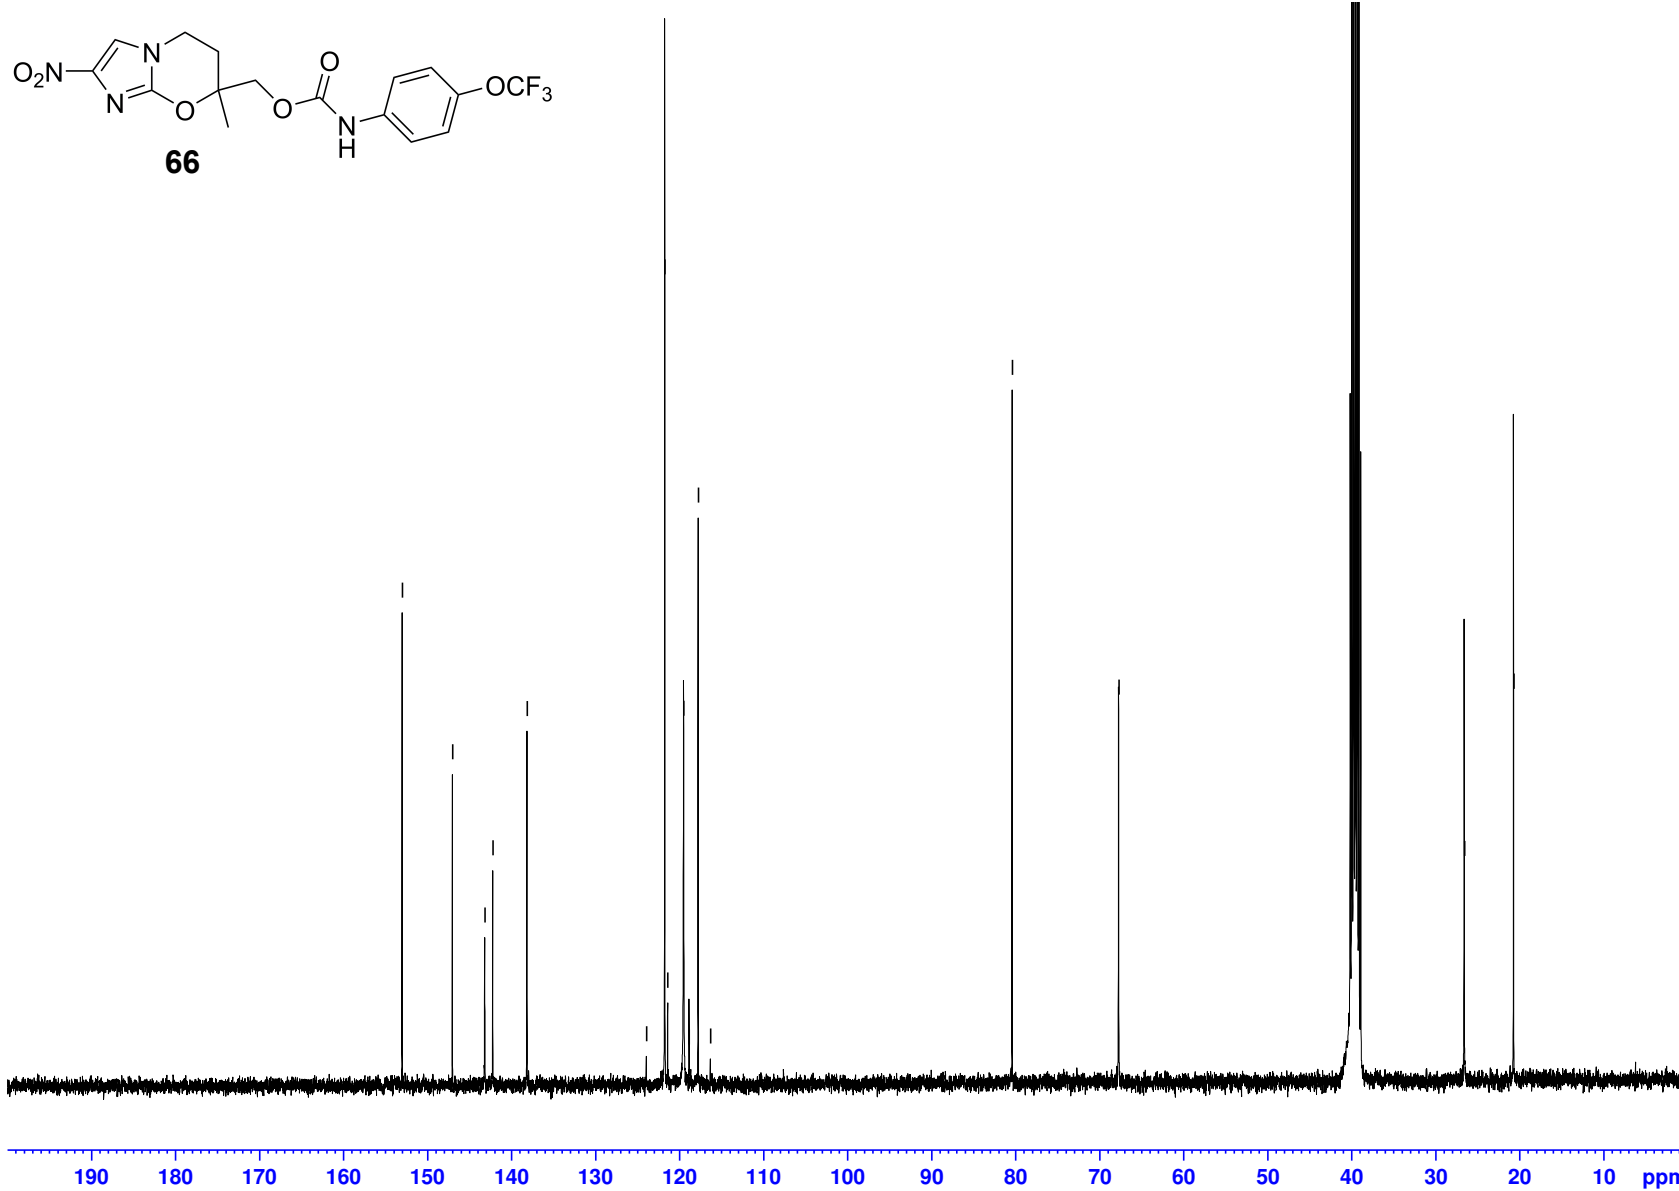

Current Data Parameters  
 NAME Aug07-2015-FMHsacsrcnmr  
 EXPNO 47  
 PROCNO 1

F2 - Acquisition Parameters  
 Date\_ 20150809  
 Time 19.48 h  
 INSTRUM spect  
 PROBHD 5 mm BBO BB-1H  
 PULPROG zgpg50  
 TD 65536  
 SOLVENT DMSO  
 NS 9000  
 DS 4  
 SWH 26178.010 Hz  
 FIDRES 0.798889 Hz  
 AQ 1.2517376 sec  
 RG 11585.2  
 DW 19.100 usec  
 DE 10.00 usec  
 TE 298.0 K  
 D1 0.75000000 sec  
 d11 0.03000000 sec  
 DELTA 0.64999998 sec  
 TD0 1  
 SFO1 100.6248425 MHz  
 NUC1 13C  
 P1 11.80 usec  
 SFO2 400.1316005 MHz  
 NUC2 1H  
 CPDPRG[2] waltz16  
 PCPD2 100.00 usec

F2 - Processing parameters  
 SI 32768  
 SF 100.6128169 MHz  
 WDW EM  
 SSB 0  
 LB 1.00 Hz  
 GB 0  
 PC 1.40



68 (in D<sub>6</sub>-DMSO)

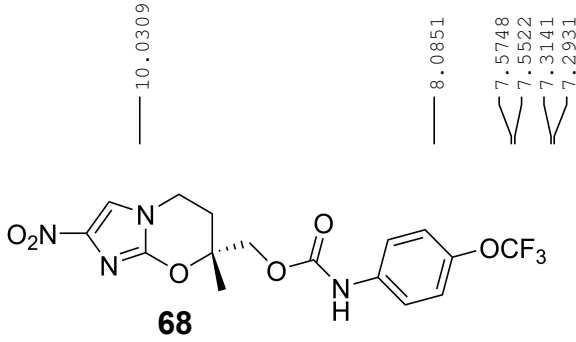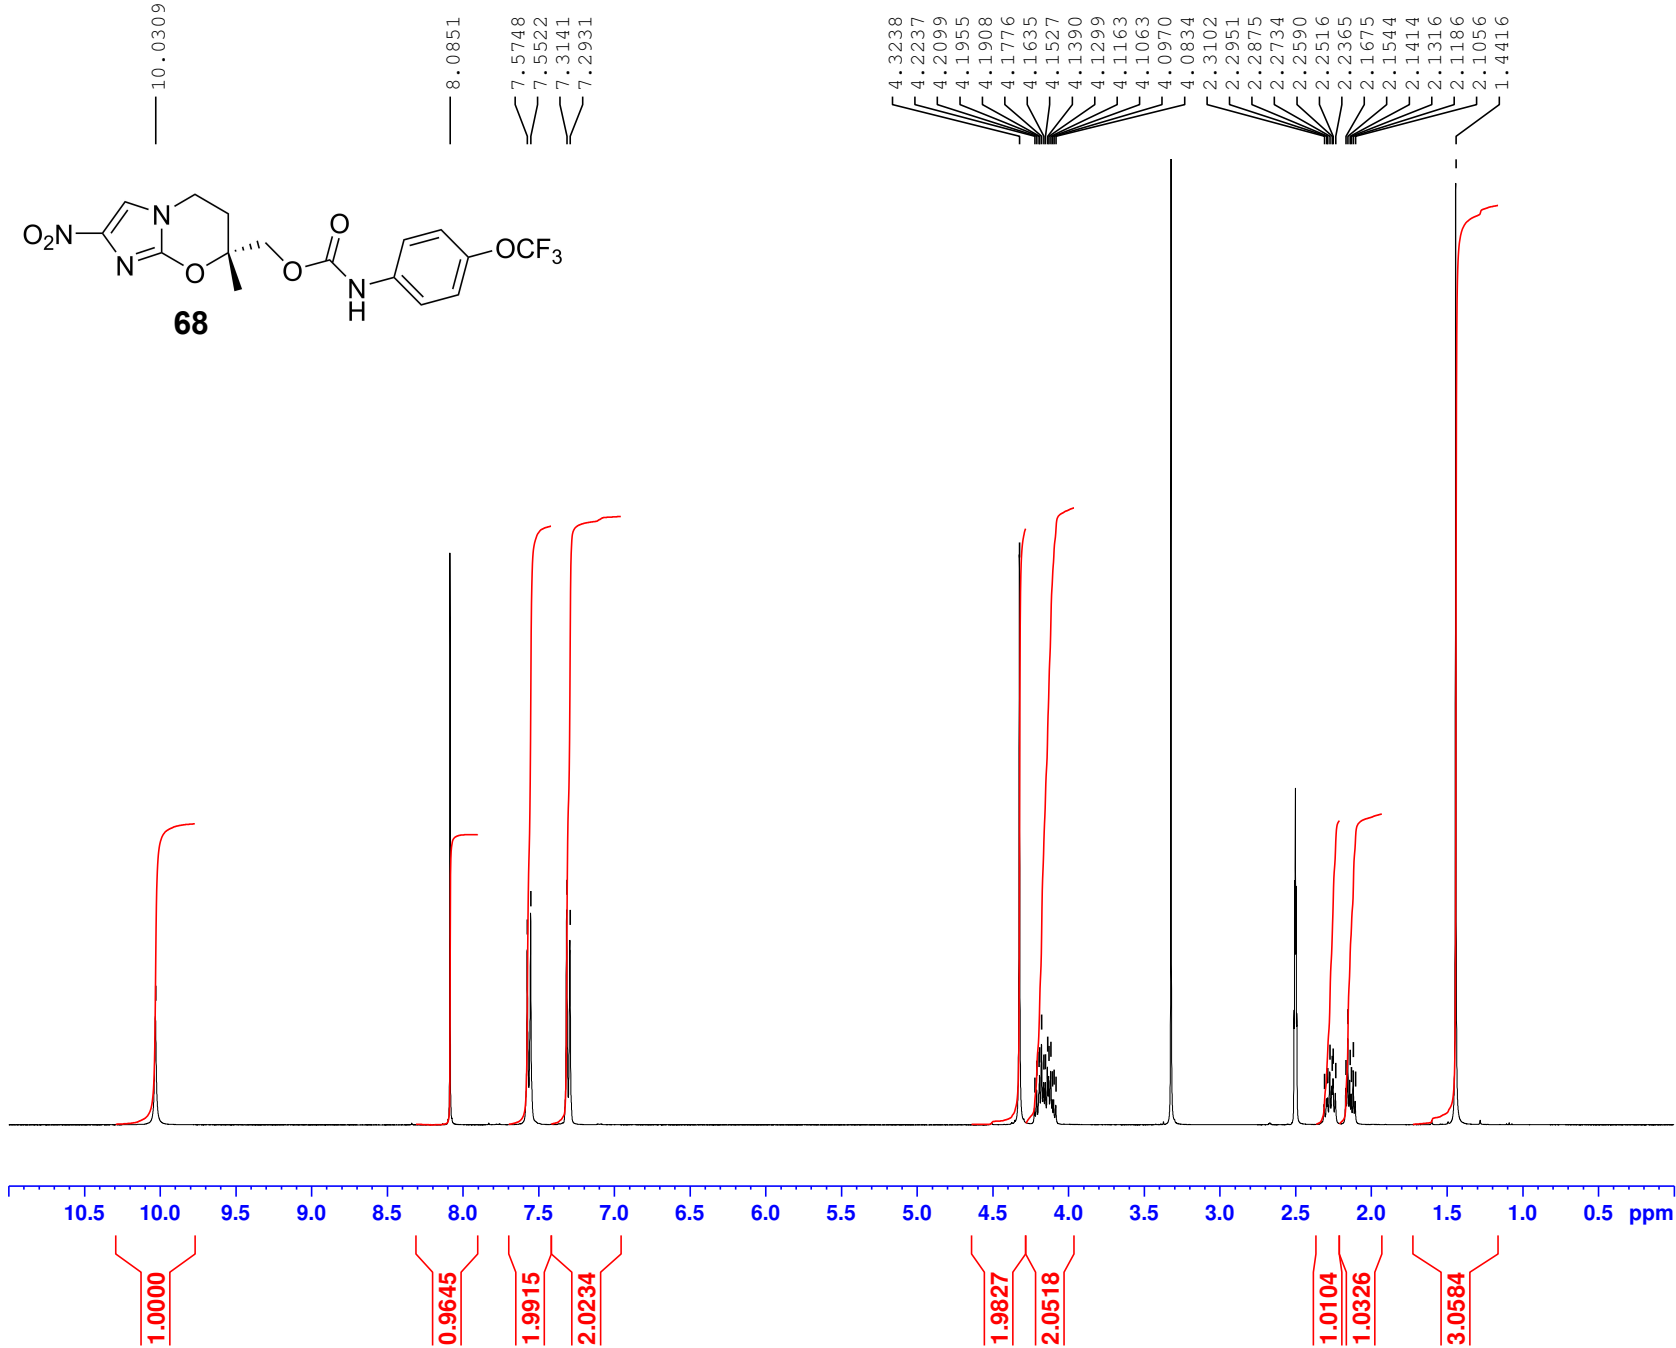

Current Data Parameters  
 NAME Dec04-2020  
 EXPNO 11  
 PROCNO 1

F2 - Acquisition Parameters  
 Date\_ 20201206  
 Time 9.35 h  
 INSTRUM spect  
 PROBHD Z108618\_0860 (  
 PULPROG zg30  
 TD 65536  
 SOLVENT DMSO  
 NS 64  
 DS 2  
 SWH 8012.820 Hz  
 FIDRES 0.244532 Hz  
 AQ 4.0894465 sec  
 RG 176.55  
 DW 62.400 usec  
 DE 6.50 usec  
 TE 298.0 K  
 D1 1.00000000 sec  
 TD0 1  
 SFO1 400.1324708 MHz  
 NUC1 1H  
 P0 4.53 usec  
 P1 13.60 usec  
 PLW1 13.19999981 W

F2 - Processing parameters  
 SI 65536  
 SF 400.1300026 MHz  
 WDW EM  
 SSB 0  
 LB 0.30 Hz  
 GB 0  
 PC 1.00

68 (in D<sub>6</sub>-DMSO)

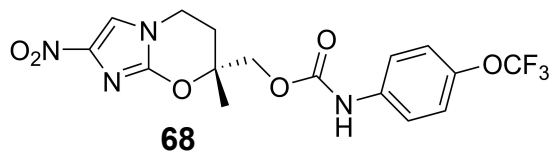

153.0099  
 147.0318  
 143.1809  
 143.1666  
 142.2170  
 138.1483  
 123.9334  
 121.7486  
 121.3947  
 119.4988  
 118.8569  
 117.7762  
 116.3183  
 80.3958  
 67.7138  
 26.5672  
 20.6946

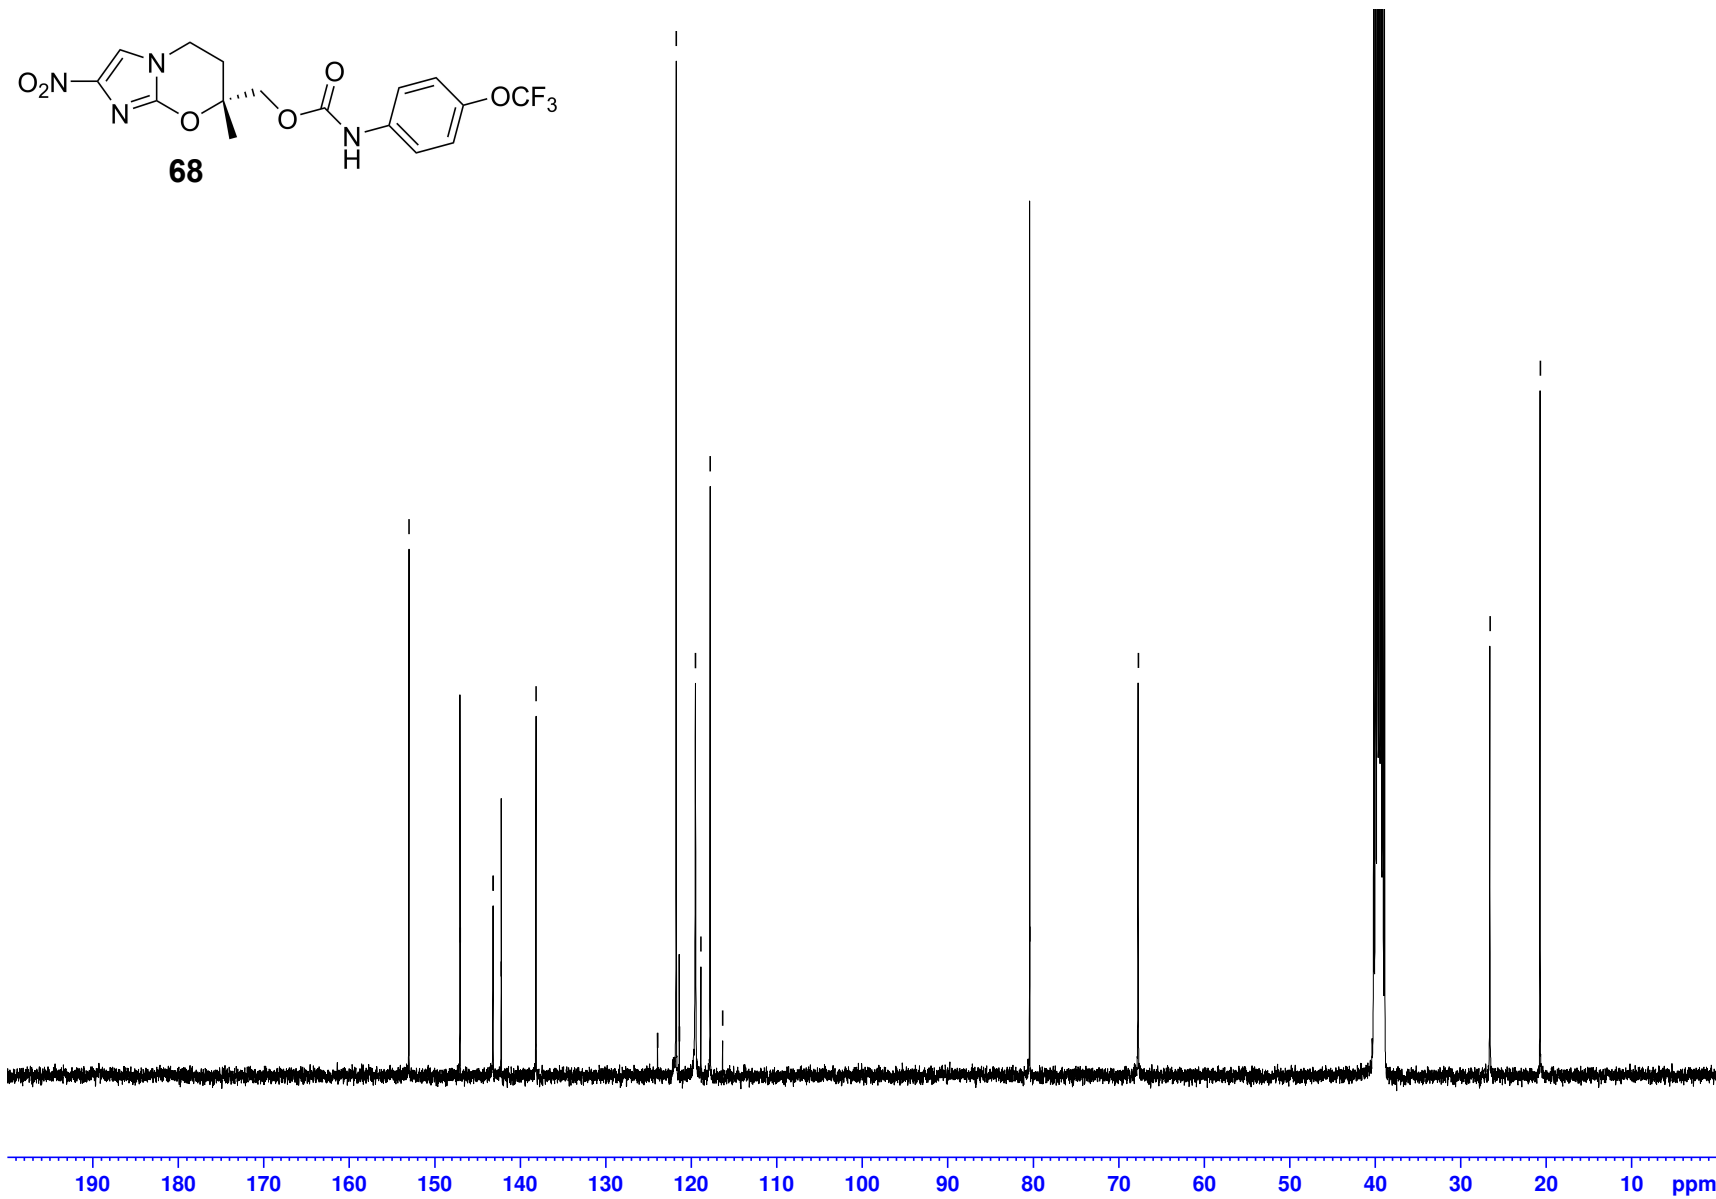

Current Data Parameters  
 NAME Dec04-2020  
 EXPNO 12  
 PROCNO 1

F2 - Acquisition Parameters  
 Date\_ 20201206  
 Time 16.30 h  
 INSTRUM spect  
 PROBHD z108618\_0860 ( )  
 PULPROG zgpg50  
 TD 65536  
 SOLVENT DMSO  
 NS 12000  
 DS 4  
 SWH 24038.461 Hz  
 FIDRES 0.733596 Hz  
 AQ 1.3631488 sec  
 RG 198.55  
 DW 20.800 usec  
 DE 6.50 usec  
 TE 298.0 K  
 D1 0.63999999 sec  
 D11 0.03000000 sec  
 TD0 1  
 SFO1 100.6228298 MHz  
 NUC1 13C  
 P1 10.00 usec  
 PLW1 48.17399979 W  
 SFO2 400.1316005 MHz  
 NUC2 1H  
 CPDPRG[2] waltz16  
 PCPD2 90.00 usec  
 PLW2 13.19999981 W  
 PLW12 0.30142000 W  
 PLW13 0.15161000 W

F2 - Processing parameters  
 SI 32768  
 SF 100.6128171 MHz  
 WDW EM  
 SSB 0  
 LB 1.00 Hz  
 GB 0  
 PC 1.40

69 (in D<sub>6</sub>-DMSO)

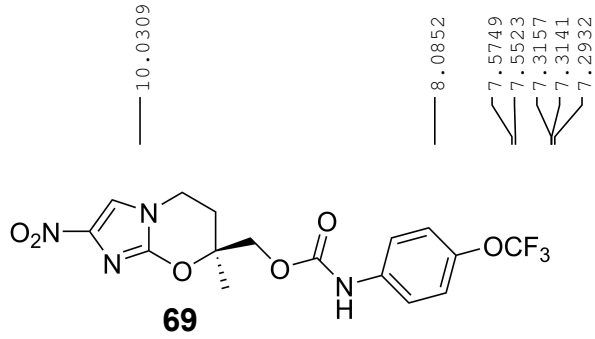

10.0309  
8.0852  
7.5749  
7.5523  
7.3157  
7.3141  
7.2932  
4.3238  
4.2237  
4.2099  
4.1955  
4.1908  
4.1777  
4.1635  
4.1527  
4.1390  
4.1299  
4.1163  
4.1063  
4.0970  
4.0834  
2.3313  
2.3266  
2.3219  
2.3102  
2.2951  
2.2875  
2.2734  
2.2590  
2.2516  
2.2364  
2.1675  
2.1544  
2.1414  
2.1316  
2.1186  
2.1056  
1.4416

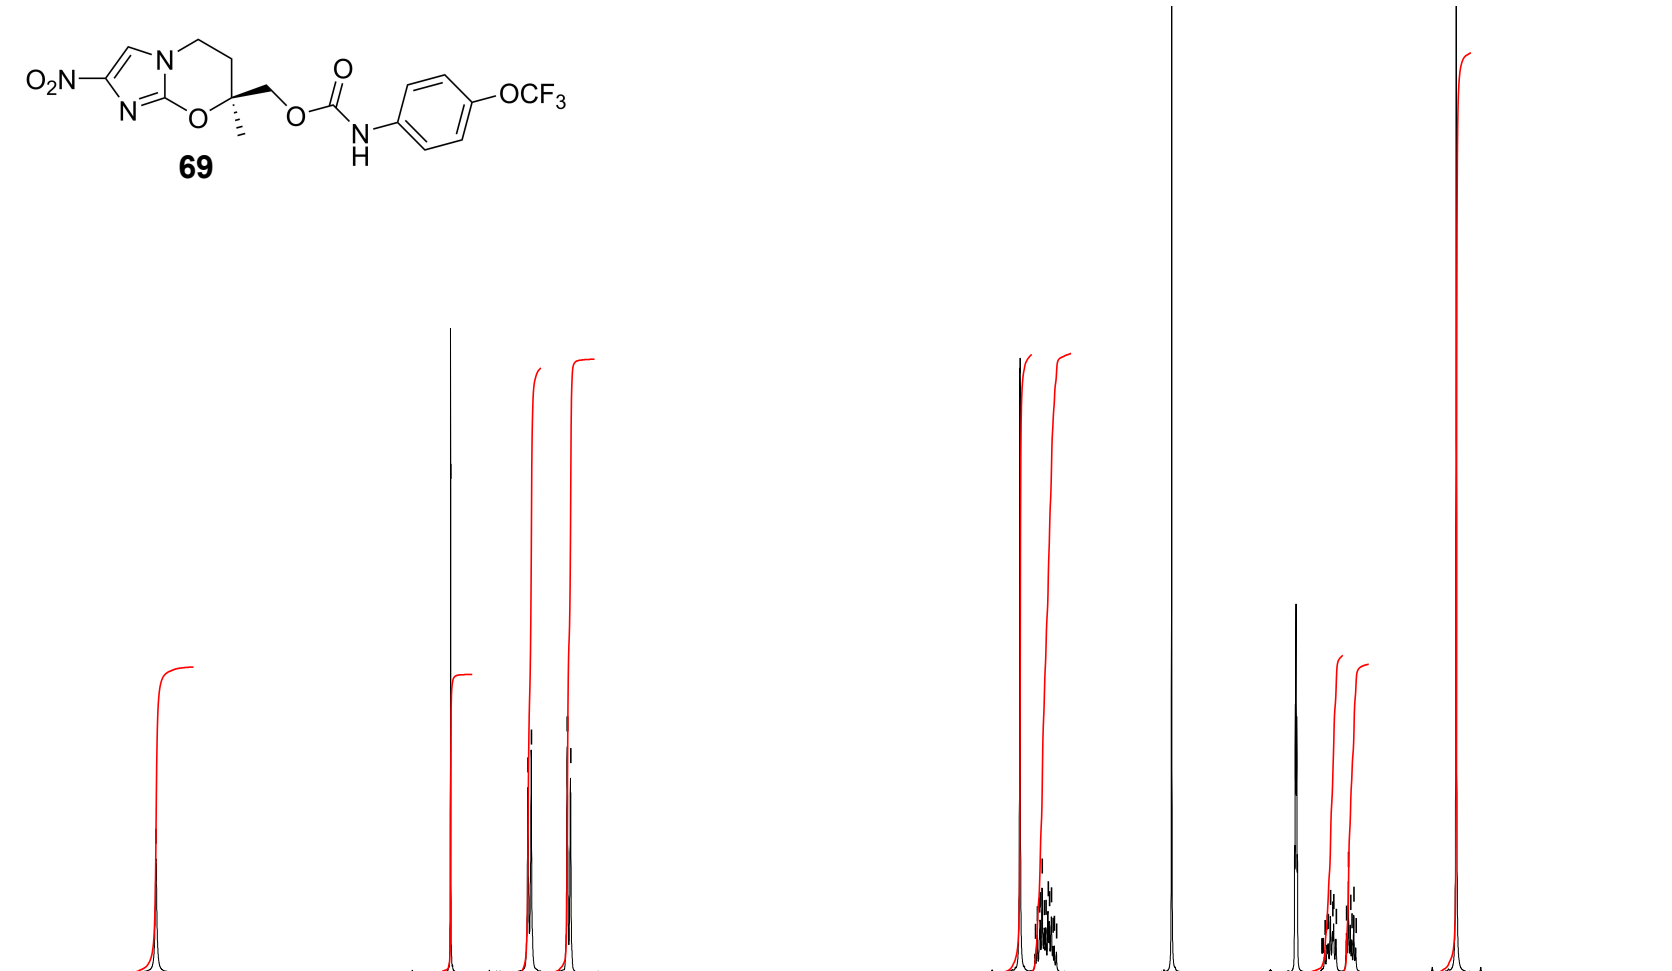

10.5 10.0 9.5 9.0 8.5 8.0 7.5 7.0 6.5 6.0 5.5 5.0 4.5 4.0 3.5 3.0 2.5 2.0 1.5 1.0 0.5 ppm

1.0000  
0.9758  
1.9803  
2.0080  
2.0245  
2.0276  
1.0387  
1.0091  
3.0123

Current Data Parameters  
 NAME Dec04-2020  
 EXPNO 14  
 PROCNO 1  
 F2 - Acquisition Parameters  
 Date\_ 20201206  
 Time 18.56 h  
 INSTRUM spect  
 PROBHD Z108618\_0860 (  
 PULPROG zg30  
 TD 65536  
 SOLVENT DMSO  
 NS 64  
 DS 2  
 SWH 8012.820 Hz  
 FIDRES 0.244532 Hz  
 AQ 4.0894465 sec  
 RG 156.54  
 DW 62.400 usec  
 DE 6.50 usec  
 TE 298.0 K  
 D1 1.00000000 sec  
 TD0 1  
 SFO1 400.1324708 MHz  
 NUC1 1H  
 P0 4.53 usec  
 P1 13.60 usec  
 PLW1 13.19999981 W  
 F2 - Processing parameters  
 SI 65536  
 SF 400.1300026 MHz  
 WDW EM  
 SSB 0  
 LB 0.30 Hz  
 GB 0  
 PC 1.00

69 (in D<sub>6</sub>-DMSO)

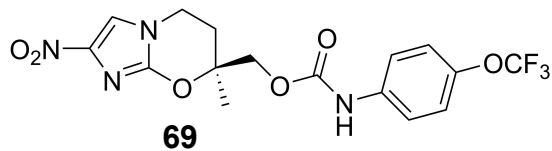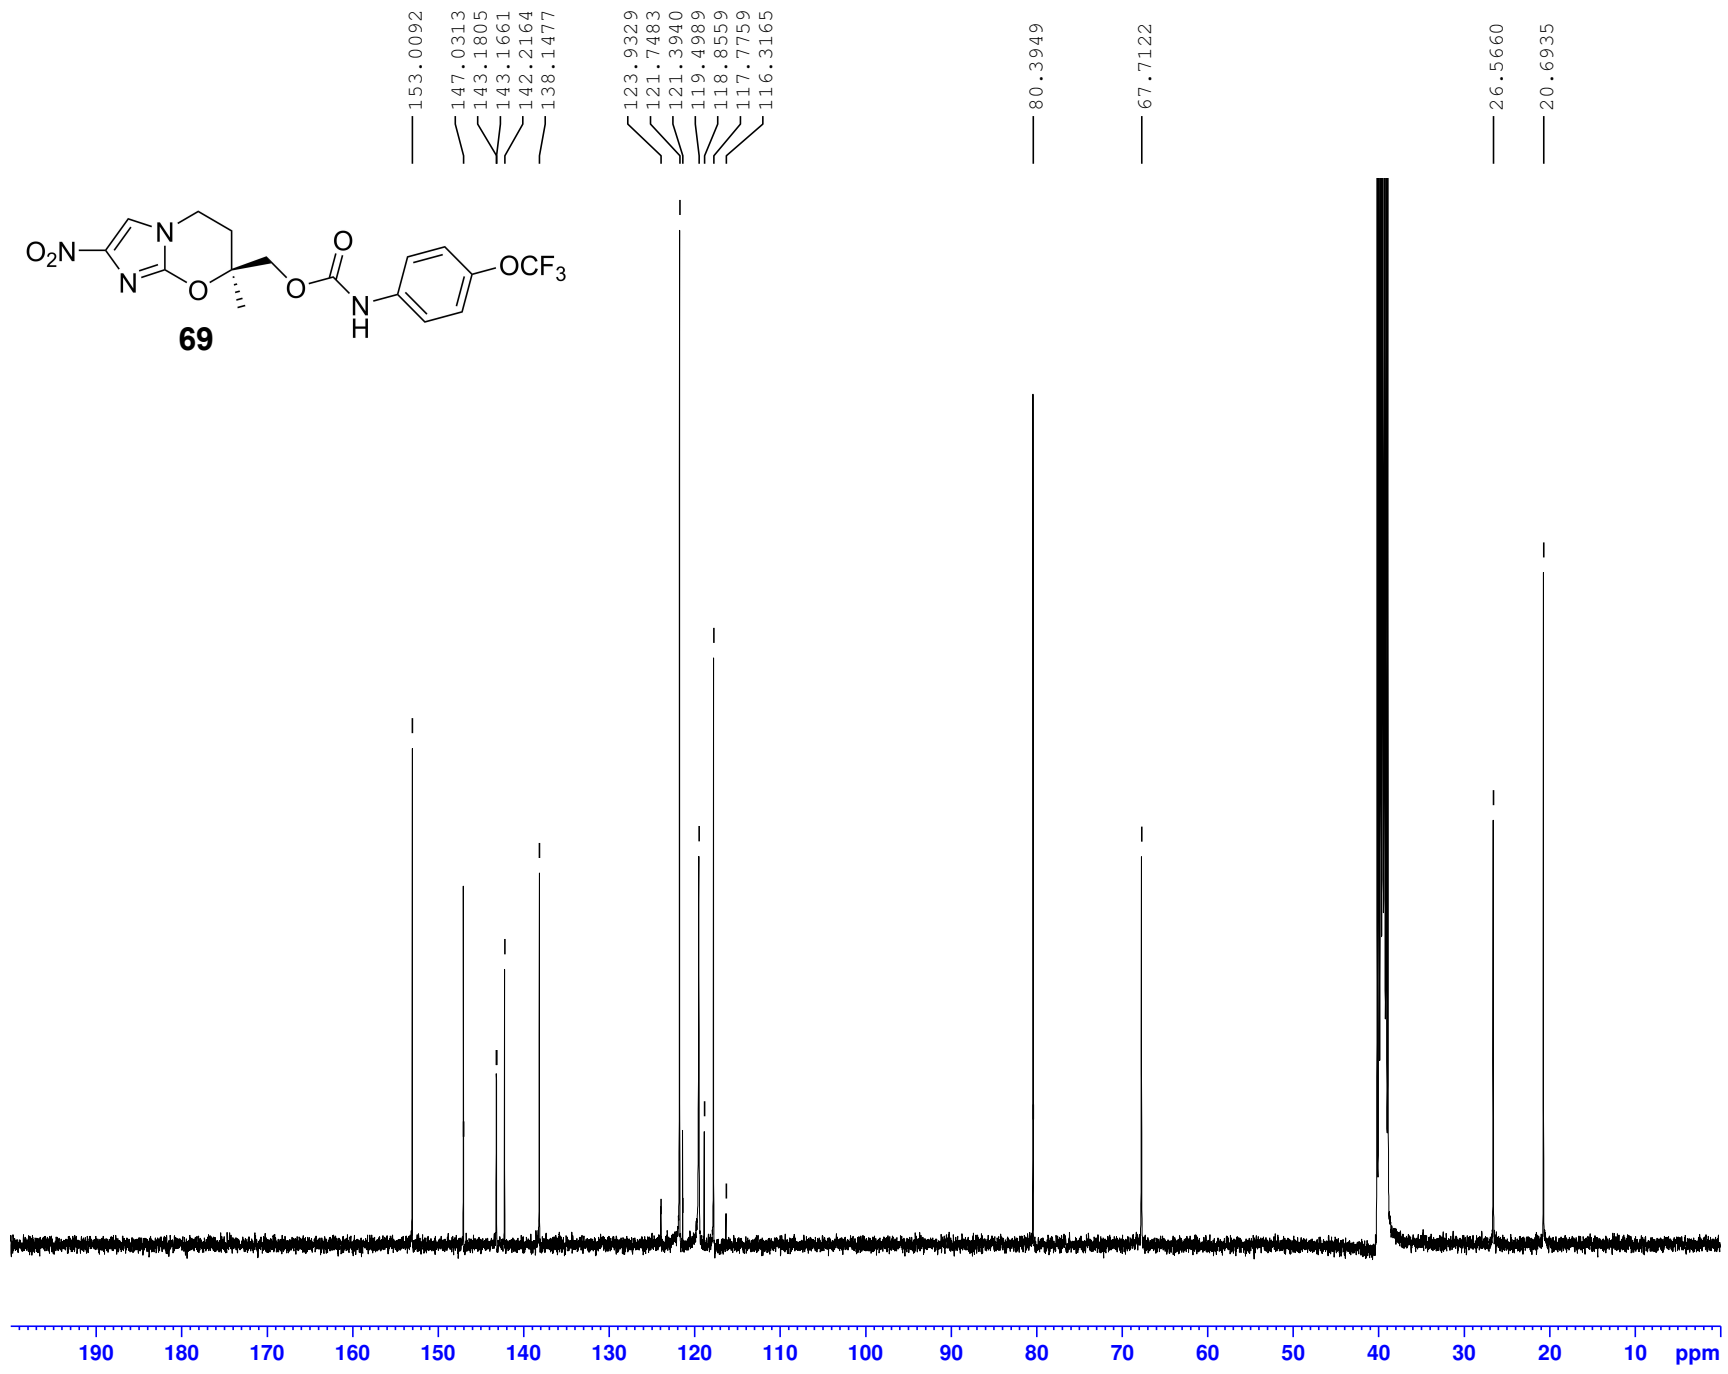

Current Data Parameters  
 NAME Dec04-2020  
 EXPNO 15  
 PROCNO 1

F2 - Acquisition Parameters  
 Date\_ 20201207  
 Time 1.50 h  
 INSTRUM spect  
 PROBHD z108618\_0860 ( )  
 PULPROG zgpg50  
 TD 65536  
 SOLVENT DMSO  
 NS 12000  
 DS 4  
 SWH 24038.461 Hz  
 FIDRES 0.733596 Hz  
 AQ 1.3631488 sec  
 RG 198.55  
 DW 20.800 usec  
 DE 6.50 usec  
 TE 298.0 K  
 D1 0.63999999 sec  
 D11 0.03000000 sec  
 TD0 1  
 SFO1 100.6228298 MHz  
 NUC1 13C  
 P1 10.00 usec  
 PLW1 48.17399979 W  
 SFO2 400.1316005 MHz  
 NUC2 1H  
 CPDPRG[2] waltz16  
 PCPD2 90.00 usec  
 PLW2 13.19999981 W  
 PLW12 0.30142000 W  
 PLW13 0.15161000 W

F2 - Processing parameters  
 SI 32768  
 SF 100.6128173 MHz  
 WDW EM  
 SSB 0  
 LB 1.00 Hz  
 GB 0  
 PC 1.40

# 72 (in D<sub>6</sub>-DMSO)

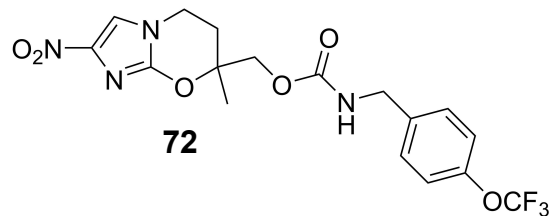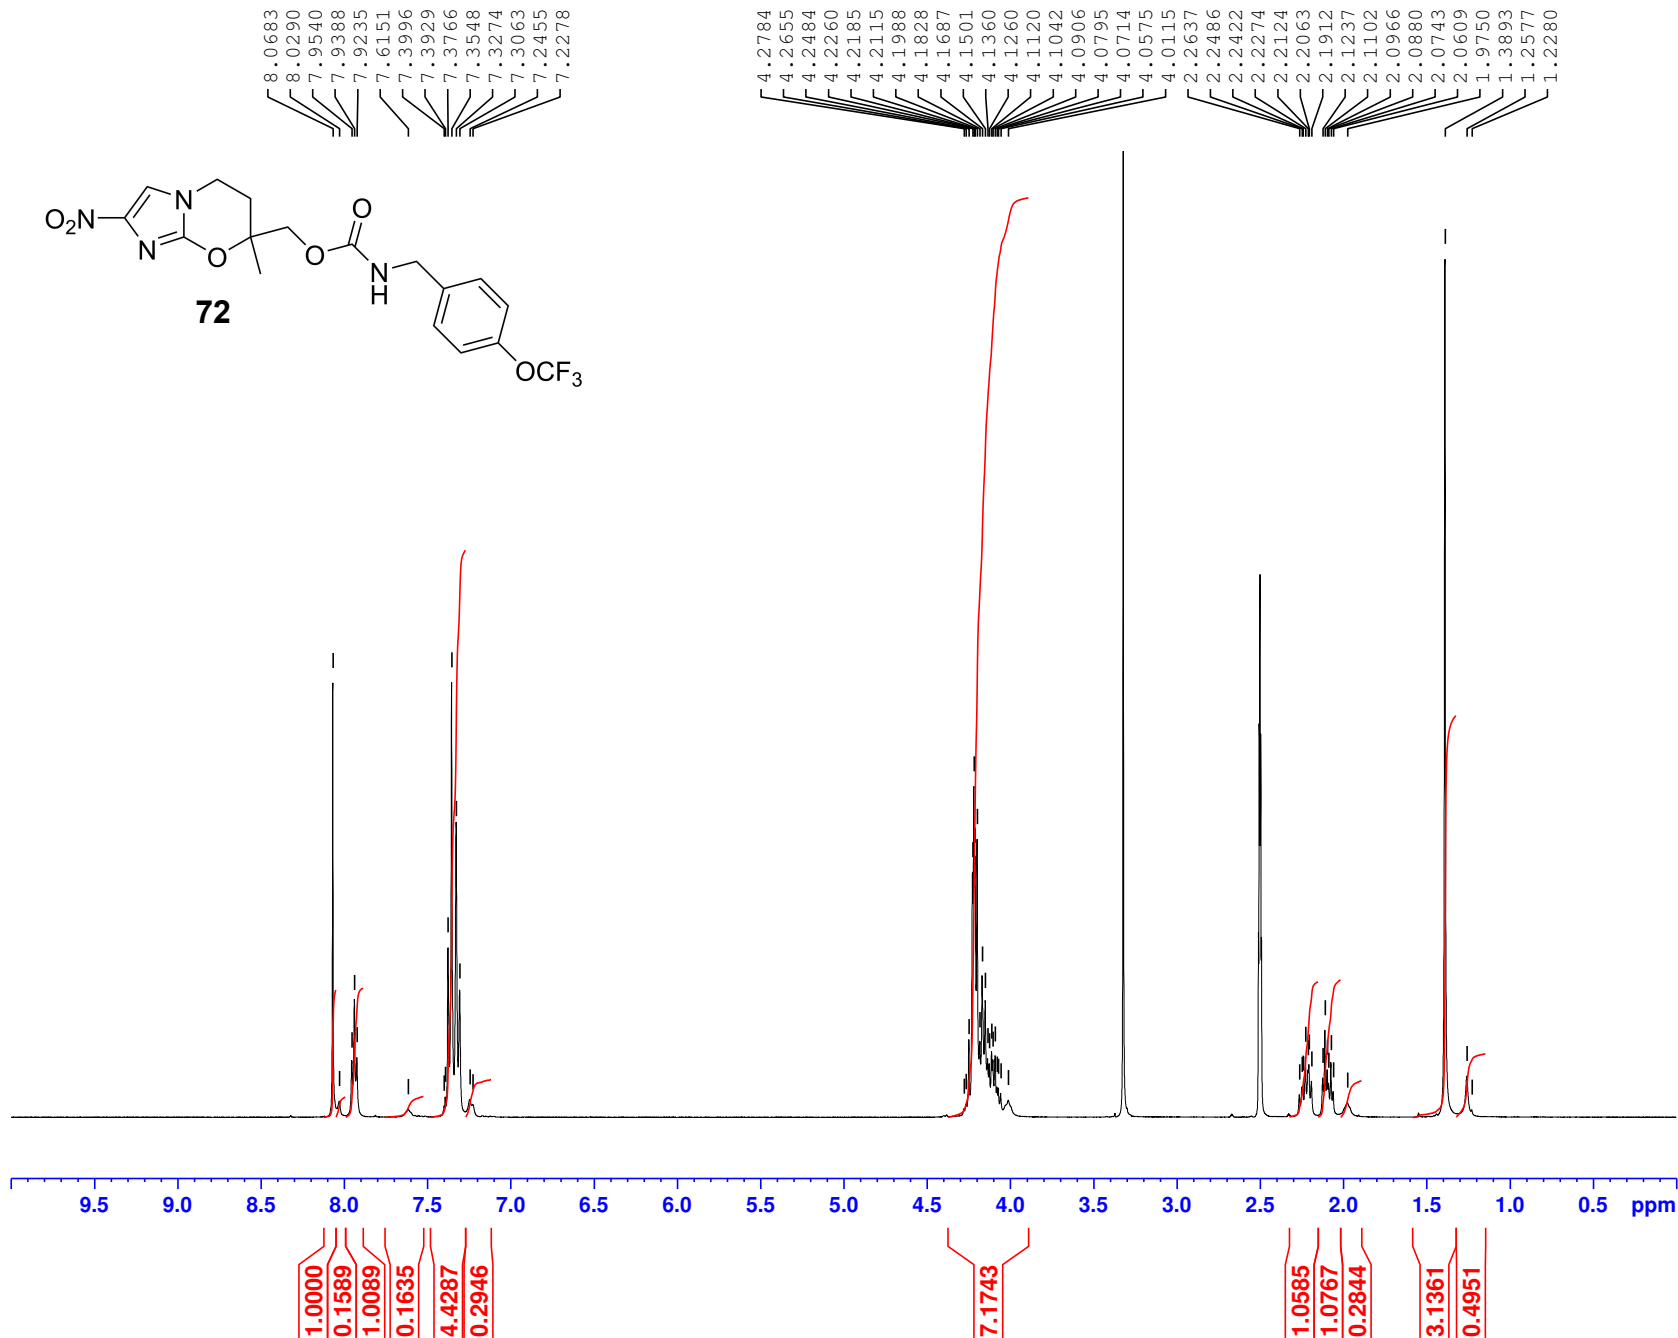

Current Data Parameters  
 NAME Dec04-2020  
 EXPNO 8  
 PROCNO 1

F2 - Acquisition Parameters  
 Date\_ 20201206  
 Time 0.15 h  
 INSTRUM spect  
 PROBHD Z108618\_0860 (  
 PULPROG zg30  
 TD 65536  
 SOLVENT DMSO  
 NS 64  
 DS 2  
 SWH 8012.820 Hz  
 FIDRES 0.244532 Hz  
 AQ 4.0894465 sec  
 RG 156.54  
 DW 62.400 usec  
 DE 6.50 usec  
 TE 298.0 K  
 D1 1.00000000 sec  
 TD0 1  
 SFO1 400.1324708 MHz  
 NUC1 1H  
 P0 4.53 usec  
 P1 13.60 usec  
 PLW1 13.19999981 W

F2 - Processing parameters  
 SI 65536  
 SF 400.1300026 MHz  
 WDW EM  
 SSB 0  
 LB 0.30 Hz  
 GB 0  
 PC 1.00

72 (in D<sub>6</sub>-DMSO at 313K)

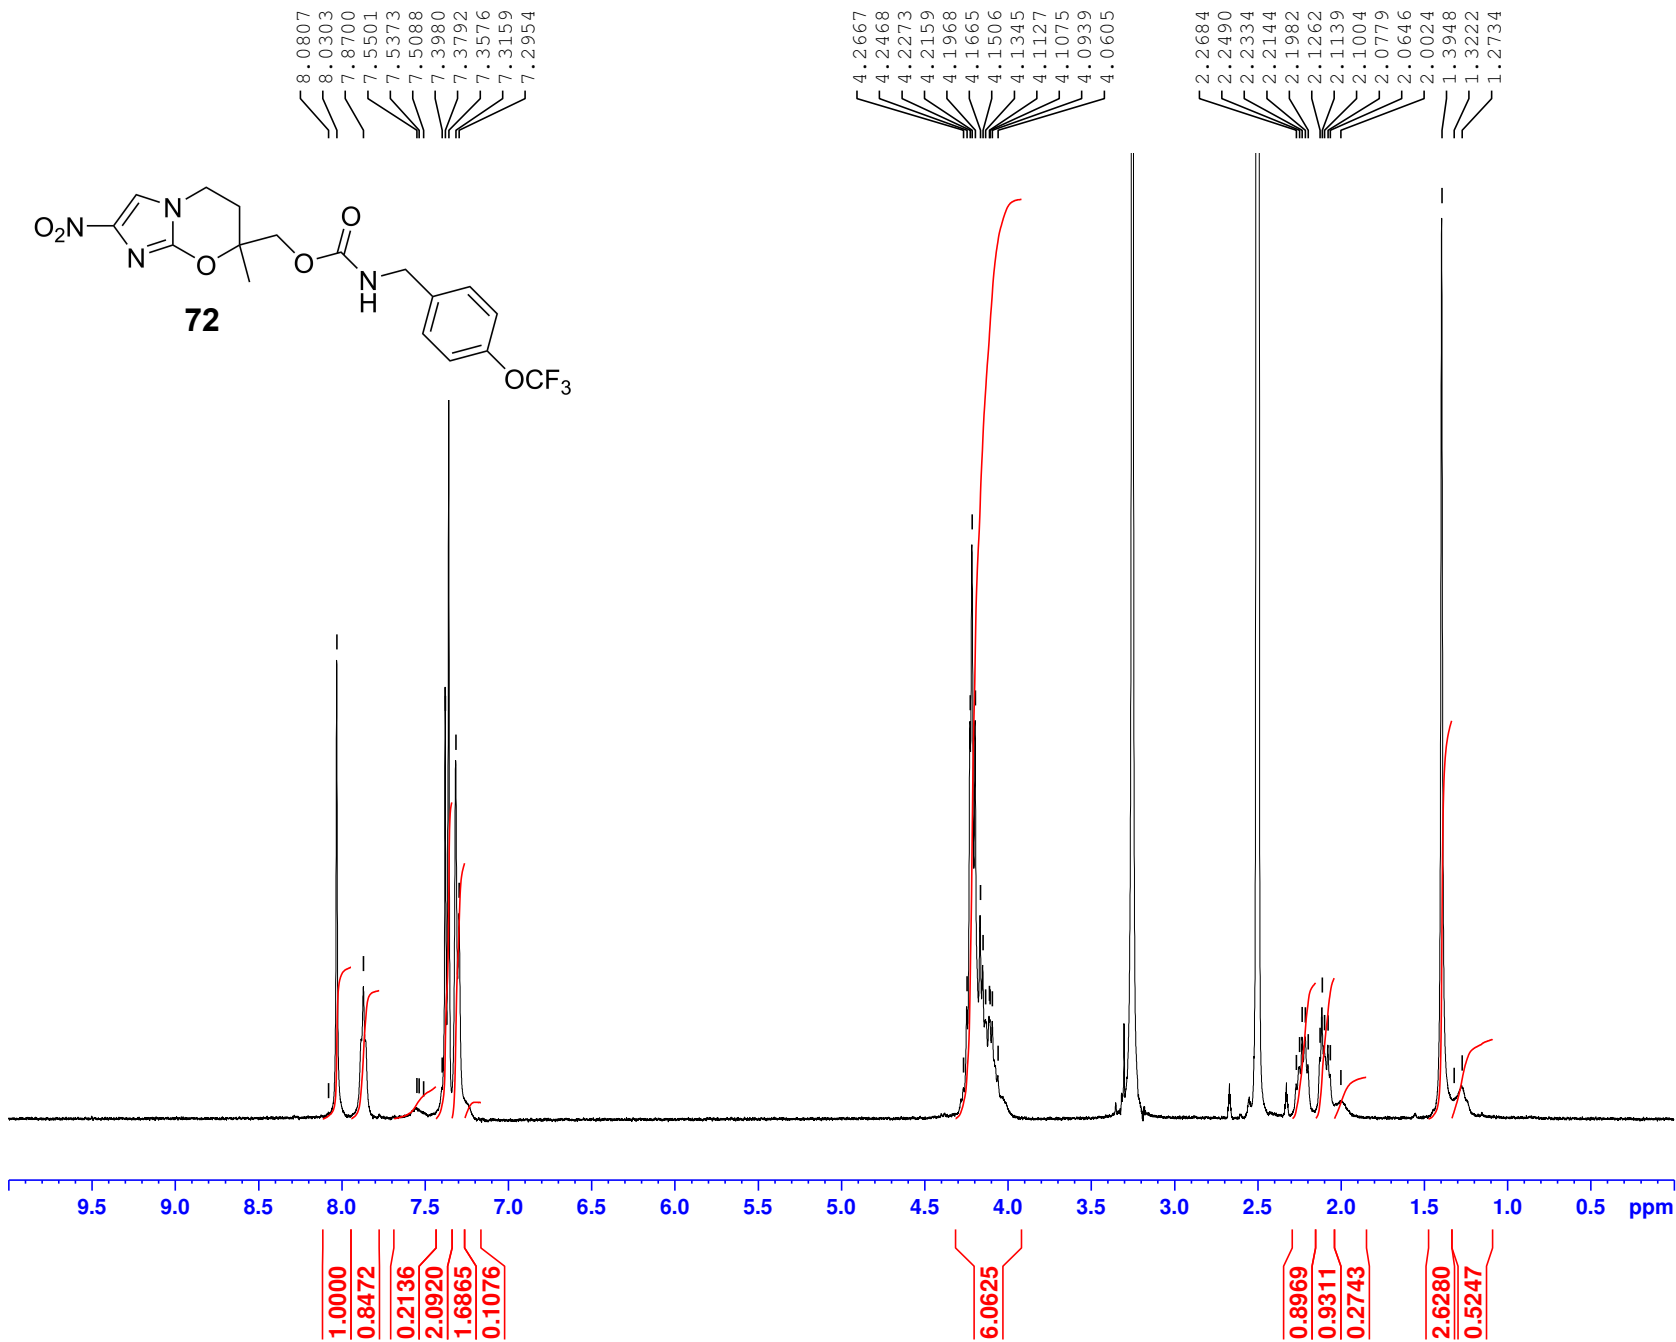

Current Data Parameters  
 NAME Sep05-2019  
 EXPNO 2  
 PROCNO 1

F2 - Acquisition Parameters  
 Date\_ 20190905  
 Time 10.59 h  
 INSTRUM spect  
 PROBHD Z108618\_0860 (  
 PULPROG zg30  
 TD 65536  
 SOLVENT DMSO  
 NS 64  
 DS 2  
 SWH 8012.820 Hz  
 FIDRES 0.244532 Hz  
 AQ 4.0894465 sec  
 RG 198.55  
 DW 62.400 usec  
 DE 6.50 usec  
 TE 313.3 K  
 D1 1.00000000 sec  
 TD0 1  
 SFO1 400.1324708 MHz  
 NUC1 1H  
 P0 4.53 usec  
 P1 13.60 usec  
 PLW1 13.19999981 W

F2 - Processing parameters  
 SI 65536  
 SF 400.1300027 MHz  
 WDW EM  
 SSB 0  
 LB 0.30 Hz  
 GB 0  
 PC 1.00

72 (in D<sub>6</sub>-DMSO at 328K)

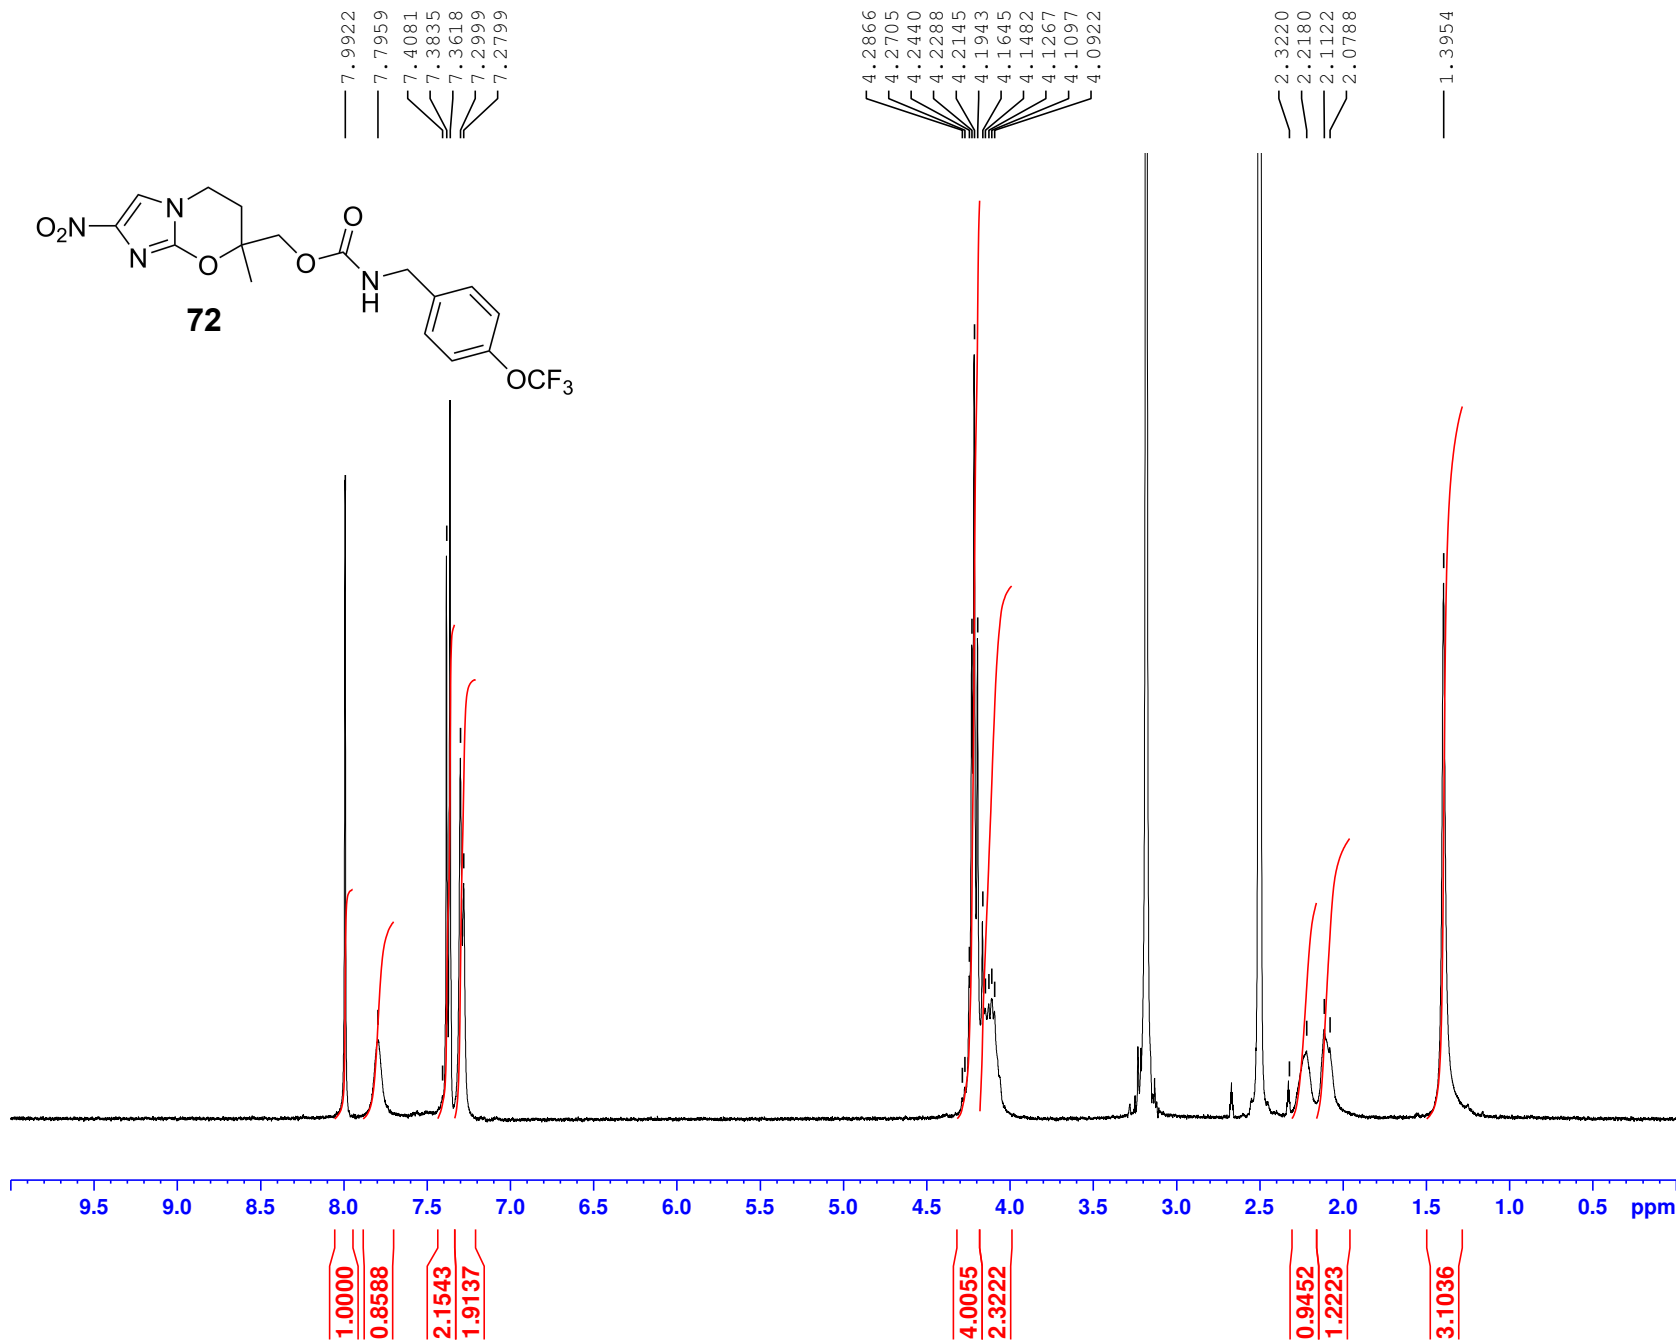

```

Current Data Parameters
NAME      Sep05-2019
EXPNO    3
PROCNO   1

F2 - Acquisition Parameters
Date_    20190905
Time     11.13 h
INSTRUM  spect
PROBHD   Z108618_0860 (
PULPROG  zg30
TD        65536
SOLVENT  DMSO
NS        64
DS        2
SWH       8012.820 Hz
FIDRES    0.244532 Hz
AQ        4.0894465 sec
RG        198.55
DW        62.400 usec
DE        6.50 usec
TE        328.0 K
D1        1.00000000 sec
TD0       1
SFO1     400.1324708 MHz
NUC1      1H
P0        4.53 usec
P1        13.60 usec
PLW1     13.19999981 W

F2 - Processing parameters
SI        65536
SF        400.1300028 MHz
WDW       EM
SSB       0
LB        0.30 Hz
GB        0
PC        1.00
    
```

72 (in D<sub>6</sub>-DMSO - variable temperature spectra overlaid)

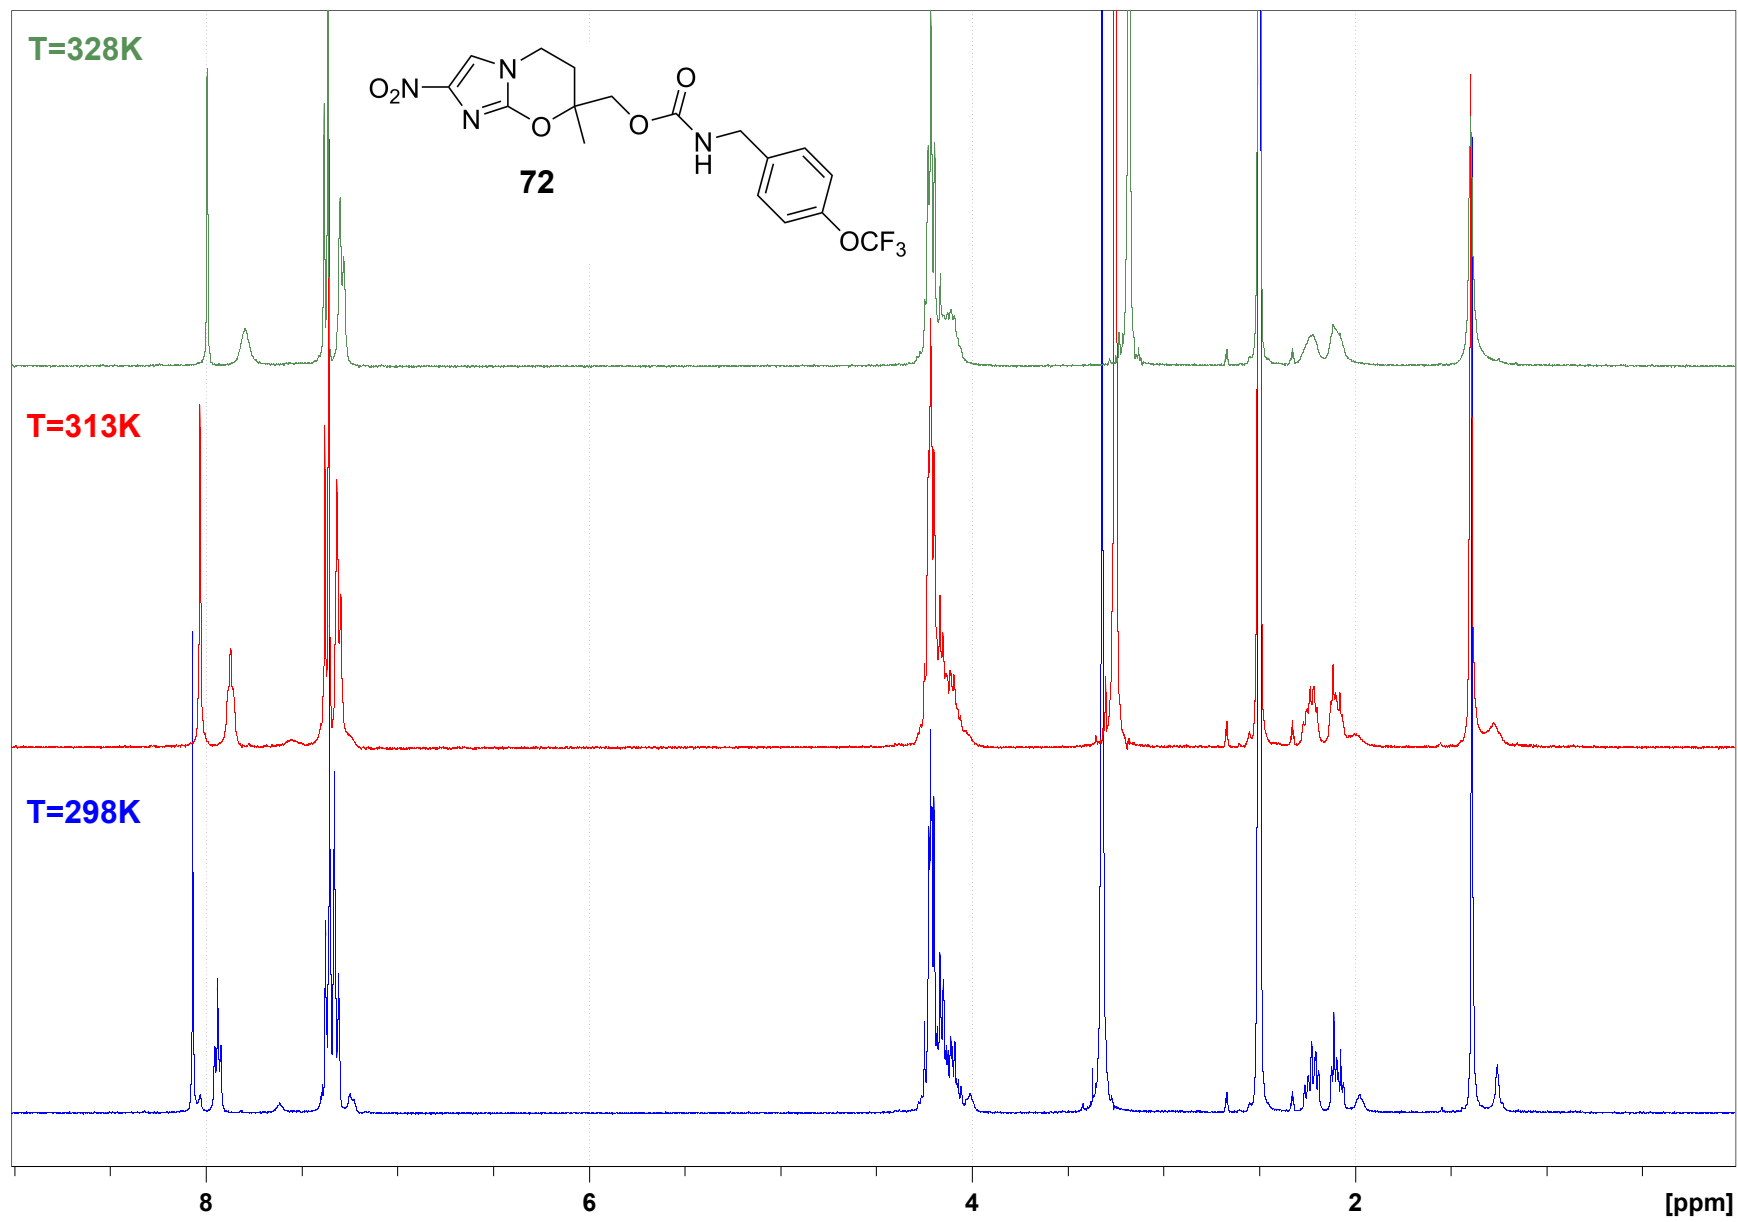



72 (in D<sub>6</sub>-DMSO)

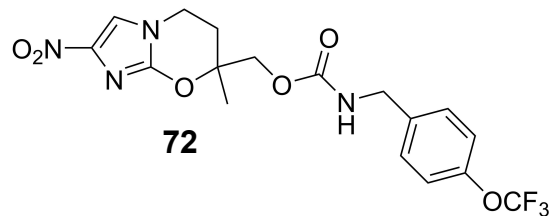

156.0074  
 147.1472  
 142.1822  
 139.0779  
 128.7600  
 123.8864  
 121.3461  
 120.9498  
 120.7702  
 118.8030  
 117.7469  
 116.2598  
 80.4649  
 67.6036  
 43.0778  
 26.7376  
 20.8919

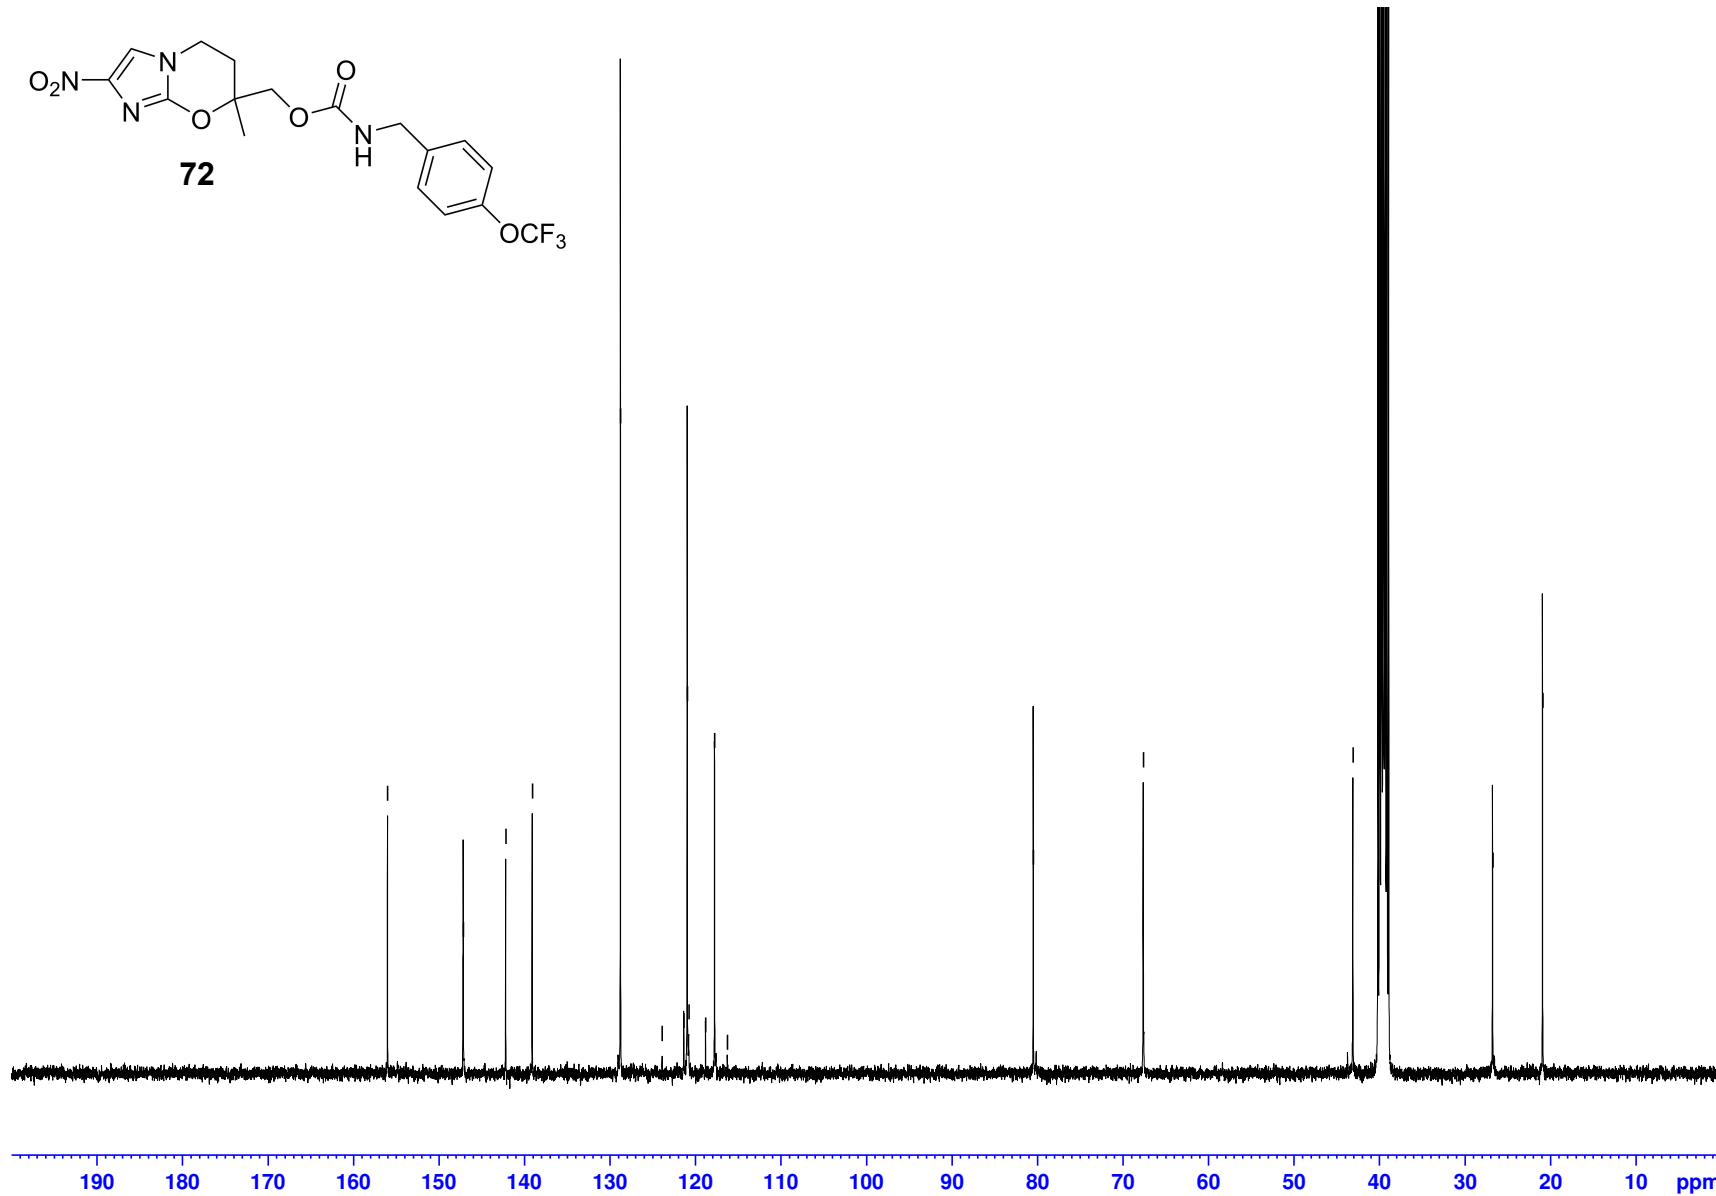

```

Current Data Parameters
NAME          Dec04-2020
EXPNO         9
PROCNO        1

F2 - Acquisition Parameters
Date_         20201206
Time          7.09 h
INSTRUM       spect
PROBHD        z108618_0860 (
PULPROG       zgpg50
TD            65536
SOLVENT       DMSO
NS            12000
DS            4
SWH           24038.461 Hz
FIDRES        0.733596 Hz
AQ            1.3631488 sec
RG            198.55
DW            20.800 usec
DE            6.50 usec
TE            298.0 K
D1            0.63999999 sec
D11           0.03000000 sec
TD0           1
SFO1          100.6228298 MHz
NUC1          13C
P1            10.00 usec
PLW1          48.17399979 W
SFO2          400.1316005 MHz
NUC2          1H
CPDPRG[2]    waltz16
PCPD2         90.00 usec
PLW2          13.19999981 W
PLW12         0.30142000 W
PLW13         0.15161000 W

F2 - Processing parameters
SI            32768
SF            100.6128171 MHz
WDW           EM
SSB           0
LB            1.00 Hz
GB            0
PC            1.40
    
```
